# Supplementary material for: Base-mediated direct fluoroalkenylation of 2-phenyl-1,3,4-oxadiazole, benzothiazole and benzoxazole with gem-difluoroalkenes
Source: Royal Society of Chemistry journal article supplement (doi:10.1039/c4ra13761b), 2014-12-22

## Supplementary Information

### Base-mediated direct fluoroalkenylation of 2-phenyl-1,3,4-oxadiazole, benzothiazole and benzoxazole with *gem*-difluoroalkenes

Xuxue Zhang, Yingyin Lin, Juan Zhang, and Song Cao\*

*Shanghai Key Laboratory of Chemical Biology, School of Pharmacy, East China University of Science and Technology (ECUST), Shanghai 200237, China*

*\*Corresponding author: Tel: +86-21-64253452; fax: +86-21-64252603; E-mail: address: scao@ecust.edu.cn*

### Table of contents

|                                                                                                  |    |
|--------------------------------------------------------------------------------------------------|----|
| General experimental procedures                                                                  | P2 |
| Preparation of 1,1-difluoroalkenes <b>1a–g</b> and 2-phenyl-1,3,4-oxadiazole <b>2a</b>           | P2 |
| General procedure for synthesis of <b>3aa–ga</b>                                                 | P2 |
| General procedure for synthesis of <b>3ab–gb</b>                                                 | P2 |
| General procedure for synthesis of <b>3ac–cc</b> , <b>3gc</b>                                    | P2 |
| Spectral and analytical data of compounds <b>3</b>                                               | P3 |
| References                                                                                       | P7 |
| <sup>1</sup> H, <sup>13</sup> C, <sup>19</sup> F NMR and HRMS (EI) spectra of compounds <b>3</b> | P8 |

## General experimental procedures

All reagents were of analytical grade, and obtained from commercial suppliers and used without further purification. DMSO and other solvents were dried by standard method prior to use. Melting points were measured in an open capillary using Büchi melting point B-540 apparatus and are uncorrected.  $^1\text{H}$  NMR and  $^{13}\text{C}$  NMR spectra were recorded on a 400 spectrometer (400 MHz for  $^1\text{H}$  and 100 MHz for  $^{13}\text{C}$  NMR, respectively) using TMS as internal standard. The  $^{19}\text{F}$  NMR spectra were obtained using a 400 spectrometer (376 MHz).  $\text{CDCl}_3$  was used as the NMR solvent in all cases. High resolution mass spectra (HRMS) were recorded under electron impact conditions using a MicroMass GCT CA 055 instrument and recorded on a MicroMass LCTTM spectrometer. Silica gel (300–400 mesh size) was used for column chromatography. TLC analysis of reaction mixtures was performed using silica gel plates.

### Preparation of 1, 1-difluoroalkenes **1a–g** and 2-phenyl-1,3,4-oxadiazole **2a**

The 1,1-difluoroalkenes (**1a–g**) were prepared according to the Hu's reported procedure.<sup>1</sup> The 2-phenyl-1,3,4-oxadiazole (**2a**) was prepared according to the Miura's reported procedure.<sup>2</sup>

### General procedure for synthesis of **3aa–ga**

A solution of **1a–g** (1.0 mmol) in DMSO (0.2 mL) was added dropwise to a mixture of **2a** (584 mg, 4.0 mmol) and a THF solution of KHMDS (4.0 mmol, 4.0 mL, 1.0 M) in DMSO (5 mL) via syringe and then stirred at room temperature for 12 h (monitored by TLC). After the consumption of the 1,1-difluoroalkenes (**1a–g**), the reaction mixture was quenched with  $\text{H}_2\text{O}$  (20 mL), and subsequently extracted with EtOAc ( $3 \times 10$  mL). The combined organic layer was dried over anhydrous  $\text{Na}_2\text{SO}_4$ , filtered, and concentrated under vacuum. The crude residue was then purified by column chromatography on silica gel using a hexane/EtOAc (30:1) mixture as eluent to afford the pure target compounds **3aa–ga**.

### General procedure for synthesis of **3ab–gb**

A solution of **1a–g** (1.0 mmol) in DMSO (0.2 mL) was added dropwise to a mixture of **2b** (270 mg, 2.0 mmol) and a THF solution of KHMDS (2.0 mmol, 2.0 mL, 1.0 M) in DMSO (5 mL) via syringe and then stirred at room temperature for 2 h (monitored by TLC). After the consumption of the 1,1-difluoroalkenes (**1a–g**), the reaction mixture was quenched with  $\text{H}_2\text{O}$  (20 mL), and subsequently extracted with EtOAc ( $3 \times 10$  mL). The combined organic layer was dried over anhydrous  $\text{Na}_2\text{SO}_4$ , filtered, and concentrated under vacuum. The crude residue was then purified by column chromatography on silica gel using a hexane/EtOAc (30:1) mixture as eluent to afford the pure target compounds **3ab–gb**.

### General procedure for synthesis of **3ac–cc**, **3gc**

A solution of **1a–c**, **1g** (1.0 mmol) in DMSO (0.2 mL) was added dropwise to a mixture of **2c** (476 mg, 4.0 mmol) and NaH (96 mg, 4.0 mmol) in DMSO (5 mL) via syringe and then stirred at room temperature for 2 h (monitored by TLC). After the consumption of the 1,1-difluoroalkenes (**1a–c**, **1g**), the reaction mixture was quenched with  $\text{H}_2\text{O}$  (20 mL), and subsequently extracted with EtOAc ( $3 \times 10$  mL). The combined organic layer was dried over anhydrous  $\text{Na}_2\text{SO}_4$ , filtered, and concentrated under vacuum. The crude residue was then purified by column chromatography on silica gel using a hexane/EtOAc (30:1) mixture as eluent to afford the pure target compounds **3ac–cc**, **3gc**.

## Spectral and analytical data of 3

**2-(2,2-Diphenyl-1-fluorovinyl)-5-phenyl-1,3,4-oxadiazole (3aa):** White solid. Yield: 75%, mp 157.0–158.0 °C.  $^1\text{H}$  NMR (400 MHz,  $\text{CDCl}_3$ ):  $\delta$  7.64–7.62 (m, 2H), 7.54–7.38 (m, 11H), 7.35–7.32 (m, 2H) ppm;  $^{13}\text{C}$  NMR (100 MHz,  $\text{CDCl}_3$ ):  $\delta$  164.5, 159.4 (d,  $^2J_{\text{CF}} = 40.1$  Hz), 140.5 (d,  $^1J_{\text{CF}} = 248.3$  Hz), 136.1 (d,  $^3J_{\text{CF}} = 5.0$  Hz), 135.6 (d,  $^4J_{\text{CF}} = 2.7$  Hz), 132.0, 130.9 (d,  $^2J_{\text{CF}} = 11.0$  Hz), 130.2 (d,  $^3J_{\text{CF}} = 3.0$  Hz), 130.1, 130.0, 129.1, 129.0, 128.7, 128.4, 126.9, 123.2 ppm;  $^{19}\text{F}$  NMR (376 MHz,  $\text{CDCl}_3$ ):  $\delta$  -123.0 (s, 1F) ppm; HRMS (EI): calcd for  $\text{C}_{22}\text{H}_{15}\text{FN}_2\text{O}$   $[\text{M}-\text{H}]^+$ : 341.1090, found: 341.1100.

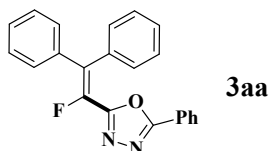

**2-(2,2-Di-4-fluorophenyl-1-fluorovinyl)-5-phenyl-1,3,4-oxadiazole (3ba):** White solid. Yield: 78%, mp 153.7–154.8 °C.  $^1\text{H}$  NMR (400 MHz,  $\text{CDCl}_3$ ):  $\delta$  7.71–7.69 (m, 2H), 7.53–7.43 (m, 5H), 7.32–7.29 (m, 2H), 7.20–7.08 (m, 4H) ppm;  $^{13}\text{C}$  NMR (100 MHz,  $\text{CDCl}_3$ ):  $\delta$  164.5, 163.2 (d,  $^1J_{\text{CF}} = 247.8$  Hz), 162.9 (d,  $^1J_{\text{CF}} = 249.4$  Hz), 140.5 (d,  $^1J_{\text{CF}} = 249.0$  Hz), 132.2–132.1 (m), 132.1–132.0 (m), 131.8–131.7 (m), 131.6–131.5 (m), 129.1, 128.9 (d,  $^2J_{\text{CF}} = 14.6$  Hz), 128.8, 128.7 (d,  $^2J_{\text{CF}} = 41.1$  Hz), 126.9, 123.0, 115.9 (d,  $^2J_{\text{CF}} = 21.6$  Hz), 115.6 (d,  $^2J_{\text{CF}} = 21.5$  Hz) ppm;  $^{19}\text{F}$  NMR (376 MHz,  $\text{CDCl}_3$ ):  $\delta$  -110.7 to -110.8 (m, 1F), -112.0 to -112.1 (m, 1F), -122.2 (s, 1F) ppm; HRMS (EI): calcd for  $\text{C}_{22}\text{H}_{13}\text{F}_3\text{N}_2\text{O}$   $[\text{M}-\text{H}]^+$ : 377.0902, found: 377.0919.

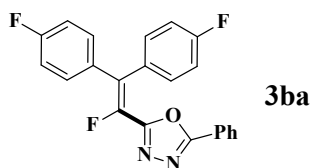

**2-(2,2-Di-4-chlorophenyl-1-fluorovinyl)-5-phenyl-1,3,4-oxadiazole (3ca):** White solid. Yield: 78%, mp 129.6–130.6 °C.  $^1\text{H}$  NMR (400 MHz,  $\text{CDCl}_3$ ):  $\delta$  7.66 (d,  $J = 7.2$  Hz, 2H), 7.53–7.39 (m, 9H), 7.26 (d,  $J = 8.4$  Hz, 2H) ppm;  $^{13}\text{C}$  NMR (100 MHz,  $\text{CDCl}_3$ ):  $\delta$  164.6, 158.8 (d,  $^2J_{\text{CF}} = 39.3$  Hz), 140.9 (d,  $^1J_{\text{CF}} = 250.6$  Hz), 135.4 (d,  $^4J_{\text{CF}} = 1.8$  Hz), 135.3, 134.0 (d,  $^3J_{\text{CF}} = 5.2$  Hz), 133.6 (d,  $^4J_{\text{CF}} = 2.9$  Hz), 132.2, 131.6 (d,  $^3J_{\text{CF}} = 3.1$  Hz), 131.4, 131.3, 129.2, 128.8, 128.5 (d,  $^2J_{\text{CF}} = 11.5$  Hz), 126.9, 122.9 ppm;  $^{19}\text{F}$  NMR (376 MHz,  $\text{CDCl}_3$ ):  $\delta$  -121.4 (s, 1F) ppm; HRMS (EI): calcd for  $\text{C}_{22}\text{H}_{13}\text{Cl}_2\text{FN}_2\text{O}$   $[\text{M}-\text{H}]^+$ : 409.0311, found: 409.0310.

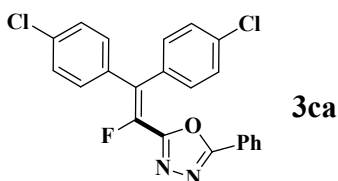

**2-(2,2-Di-3-fluorophenyl-1-fluorovinyl)-5-phenyl-1,3,4-oxadiazole (3da):** White solid. Yield: 80%, mp 120.2–121.4 °C.  $^1\text{H}$  NMR (400 MHz,  $\text{CDCl}_3$ ):  $\delta$  7.60 (s, 1H), 7.59 (s, 1H), 7.44–7.27 (m, 5H), 7.17–6.93 (m, 6H) ppm;  $^{13}\text{C}$  NMR (100 MHz,  $\text{CDCl}_3$ ):  $\delta$  164.7, 162.9 (d,  $^1J_{\text{CF}} = 246.6$  Hz), 162.6 (d,  $^1J_{\text{CF}} = 245.0$  Hz), 158.7 (d,  $^2J_{\text{CF}} = 39.1$  Hz), 141.3 (d,  $^1J_{\text{CF}} = 251.7$  Hz), 137.4 (dd,  $^3J_{\text{CF}} = 8.0$  Hz,  $^3J_{\text{CF}} = 5.2$  Hz), 137.0 (dd,  $^3J_{\text{CF}} = 7.9$  Hz,  $^3J_{\text{CF}} = 2.7$  Hz), 132.2, 130.5 (d,  $^3J_{\text{CF}} = 8.3$  Hz), 130.0 (d,  $^3J_{\text{CF}} = 8.2$  Hz), 129.1, 126.9, 126.0–125.9 (m), 125.8–125.7 (m), 123.0, 117.3 (dd,  $^2J_{\text{CF}} = 22.1$  Hz,  $^4J_{\text{CF}} = 3.4$  Hz), 116.9 (d,  $^2J_{\text{CF}} = 23.0$  Hz), 116.8 (d,  $^2J_{\text{CF}} = 23.0$  Hz), 116.3 (d,

$^2J_{\text{CF}} = 21.1$  Hz), 116.1 (d,  $^2J_{\text{CF}} = 20.8$  Hz);  $^{19}\text{F}$  NMR (376 MHz,  $\text{CDCl}_3$ ):  $\delta$  -111.9 to -112.0 (m, 1F), -112.1 to -112.2 (m, 1F), -120.2 (s, 1F); HRMS (EI): calcd for  $\text{C}_{22}\text{H}_{13}\text{F}_3\text{N}_2\text{O}$   $[\text{M}-\text{H}]^+$ : 377.0902, found: 377.0900.

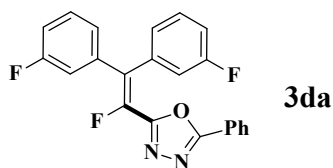

**2-(2,2-Di-3-(trifluoromethyl)phenyl-1-fluorovinyl)-5-phenyl-1,3,4-oxadiazole (3ea)**: White solid. Yield: 60%, mp 98.7–99.5 °C.  $^1\text{H}$  NMR (400 MHz,  $\text{CDCl}_3$ ):  $\delta$  7.79 (d,  $J = 7.6$  Hz, 1H), 7.72 (s, 1H), 7.67–7.40 (m, 11H) ppm;  $^{13}\text{C}$  NMR (100 MHz,  $\text{CDCl}_3$ ):  $\delta$  164.8, 158.4 (d,  $^2J_{\text{CF}} = 38.8$  Hz), 141.8 (d,  $^1J_{\text{CF}} = 252.4$  Hz), 136.0 (d,  $^3J_{\text{CF}} = 5.1$  Hz), 135.7 (d,  $^3J_{\text{CF}} = 2.5$  Hz), 133.6 (d,  $^3J_{\text{CF}} = 1.3$  Hz), 133.1 (d,  $^3J_{\text{CF}} = 4.6$  Hz), 132.4, 131.6 (q,  $^2J_{\text{CF}} = 32.6$  Hz), 131.2 (q,  $^2J_{\text{CF}} = 32.4$  Hz), 129.7, 129.3, 129.1, 127.8 (d,  $^2J_{\text{CF}} = 12.3$  Hz), 127.0, 126.9, 126.8, 126.6–126.4 (m), 126.2–126.0 (m), 123.7 (q,  $^1J_{\text{CF}} = 270.9$  Hz), 123.6 (q,  $^1J_{\text{CF}} = 270.9$  Hz), 122.8 ppm;  $^{19}\text{F}$  NMR (376 MHz,  $\text{CDCl}_3$ ):  $\delta$  -62.6 (s, 3F), -62.8 (s, 3F), -119.6 (s, 1F) ppm; HRMS (EI): calcd for  $\text{C}_{24}\text{H}_{13}\text{F}_7\text{N}_2\text{O}$   $[\text{M}-\text{H}]^+$ : 477.0838, found: 477.0848.

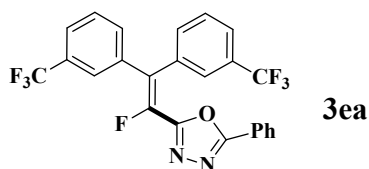

**2-(2,2-Di-4-methylphenyl-1-fluorovinyl)-5-phenyl-1,3,4-oxadiazole (3fa)**: White solid. Yield: 15%, mp 138.9–139.9 °C.  $^1\text{H}$  NMR (400 MHz,  $\text{CDCl}_3$ ):  $\delta$  7.61–7.59 (m, 2H), 7.50–7.45 (m, 1H), 7.41–7.35 (m, 4H), 7.25–7.15 (m, 6H), 2.45 (s, 3H), 2.37 (s, 3H) ppm;  $^{13}\text{C}$  NMR (100 MHz,  $\text{CDCl}_3$ ):  $\delta$  164.3, 159.6 (d,  $^2J_{\text{CF}} = 40.2$  Hz), 140.1 (d,  $^1J_{\text{CF}} = 247.4$  Hz), 139.3, 138.6, 133.2 (d,  $^3J_{\text{CF}} = 5.3$  Hz), 132.9 (d,  $^3J_{\text{CF}} = 3.0$  Hz), 131.9, 130.9 (d,  $^2J_{\text{CF}} = 10.7$  Hz), 130.1 (d,  $^4J_{\text{CF}} = 1.7$  Hz), 130.0 (d,  $^4J_{\text{CF}} = 2.8$  Hz), 129.3, 129.1, 128.9, 126.9, 123.3, 21.4, 21.3 ppm;  $^{19}\text{F}$  NMR (376 MHz,  $\text{CDCl}_3$ ):  $\delta$  -123.9 (s, 1F); HRMS (EI): calcd for  $\text{C}_{24}\text{H}_{19}\text{FN}_2\text{O}$   $[\text{M}-\text{H}]^+$ : 369.1403, found: 369.1413.

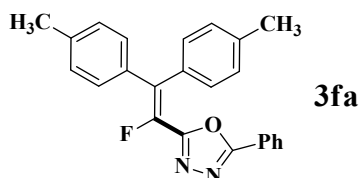

**(E/Z)-2-(2-(4-Fluorophenyl)-2-phenyl-1-fluorovinyl)-5-phenyl-1,3,4-oxadiazole (3ga)**: White solid. Yield: 85%. A mixture of *E*- and *Z*-isomers (4:3, the *E/Z* ratio was determined by  $^{19}\text{F}$  NMR spectroscopy).  $^1\text{H}$  NMR (400 MHz,  $\text{CDCl}_3$ ):  $\delta$  7.70–7.67 (m, 1H), 7.60–7.58 (m, 1H), 7.51–7.37 (m, 8H), 7.30–7.27 (m, 2H), 7.16–7.12 (m, 1H), 7.10–7.06 (m, 1H) ppm;  $^{13}\text{C}$  NMR (100 MHz,  $\text{CDCl}_3$ ):  $\delta$  164.5, 164.4, 163.1 (d,  $^1J_{\text{CF}} = 247.6$  Hz), 162.9 (d,  $^1J_{\text{CF}} = 247.4$  Hz), 159.3 (d,  $^2J_{\text{CF}} = 40.0$  Hz), 159.2 (d,  $^2J_{\text{CF}} = 39.3$  Hz), 140.5 (d,  $^1J_{\text{CF}} = 249.4$  Hz), 140.4 (d,  $^1J_{\text{CF}} = 246.9$  Hz), 135.9, 135.8, 135.5, 135.4, 132.1–132.0 (m), 131.7–131.6 (m), 130.1 (d,  $^3J_{\text{CF}} = 3.0$  Hz), 130.0 (d,  $^3J_{\text{CF}} = 5.8$  Hz), 129.9 (d,  $^2J_{\text{CF}} = 13.5$  Hz), 129.7 (d,  $^2J_{\text{CF}} = 10.9$  Hz), 129.3, 129.1, 129.0, 128.9, 128.8, 128.7, 128.5, 128.4, 126.9, 126.8, 123.2, 123.1, 115.8 (d,  $^2J_{\text{CF}} = 21.6$  Hz), 115.5 (d,  $^2J_{\text{CF}} = 21.6$  Hz) ppm;  $^{19}\text{F}$  NMR (376 MHz,  $\text{CDCl}_3$ ):  $\delta$  -111.0 to -111.1 (m), -112.3 to -112.4 (m), -122.0 (s), -123.2 (s) ppm; HRMS (EI): calcd for  $\text{C}_{22}\text{H}_{14}\text{F}_2\text{N}_2\text{O}$   $[\text{M}-\text{H}]^+$ : 359.0996, found: 359.1010.

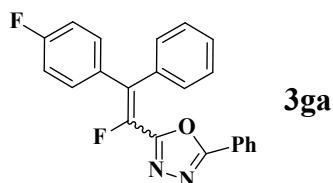

**2-(2,2-Diphenyl-1-fluorovinyl)benzo[d]thiazole (3ab):** White solid. Yield: 88%, mp 148.2–150.1 °C.  $^1\text{H}$  NMR (400 MHz,  $\text{CDCl}_3$ ):  $\delta$  8.10 (d,  $J = 8.4$  Hz, 1H), 7.70 (d,  $J = 7.6$  Hz, 1H), 7.55–7.46 (m, 6H), 7.42–7.34 (m, 6H) ppm;  $^{13}\text{C}$  NMR (100 MHz,  $\text{CDCl}_3$ ):  $\delta$  159.5 (d,  $^2J_{\text{CF}} = 27.7$  Hz), 151.6, 148.5 (d,  $^1J_{\text{CF}} = 254.4$  Hz), 136.5 (d,  $^4J_{\text{CF}} = 2.3$  Hz), 136.2 (d,  $^3J_{\text{CF}} = 6.2$  Hz), 135.6 (d,  $^4J_{\text{CF}} = 1.6$  Hz), 131.1 (d,  $^4J_{\text{CF}} = 3.0$  Hz), 130.0 (d,  $^3J_{\text{CF}} = 6.3$  Hz), 129.5, 129.4, 129.2 (d,  $^2J_{\text{CF}} = 13.9$  Hz), 128.6, 128.3, 126.5, 126.0, 123.7, 121.0 ppm;  $^{19}\text{F}$  NMR (376 MHz,  $\text{CDCl}_3$ ):  $\delta$  –110.8 (s, 1F); HRMS (EI): calcd for  $\text{C}_{21}\text{H}_{14}\text{FNS}$   $[\text{M}-\text{H}]^+$ : 330.0753, found: 330.0749.

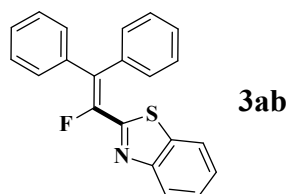

**2-(2,2-Di-4-fluorophenyl-1-fluorovinyl)benzo[d]thiazole (3bb):** White solid. Yield: 89%, mp 163.0–164.0 °C.  $^1\text{H}$  NMR (400 MHz,  $\text{CDCl}_3$ ):  $\delta$  8.03 (d,  $J = 8.4$  Hz, 1H), 7.73 (d,  $J = 8.8$  Hz, 1H), 7.49–7.43 (m, 3H), 7.38–7.32 (m, 3H), 7.22–7.17 (m, 2H), 7.10–7.06 (m, 2H) ppm;  $^{13}\text{C}$  NMR (100 MHz,  $\text{CDCl}_3$ ):  $\delta$  163.5 (d,  $^1J_{\text{CF}} = 248.1$  Hz), 162.6 (d,  $^1J_{\text{CF}} = 248.6$  Hz), 159.0 (d,  $^2J_{\text{CF}} = 28.8$  Hz), 152.2, 148.7 (d,  $^1J_{\text{CF}} = 253.4$  Hz), 135.6 (d,  $^4J_{\text{CF}} = 1.6$  Hz), 133.0 (dd,  $^3J_{\text{CF}} = 8.4$  Hz,  $^4J_{\text{CF}} = 3.1$  Hz), 132.5–132.4 (m), 132.1–132.0 (m), 131.8 (dd,  $^3J_{\text{CF}} = 8.1$  Hz,  $^4J_{\text{CF}} = 6.6$  Hz), 126.6 (d,  $^2J_{\text{CF}} = 14.5$  Hz), 126.5, 126.0, 123.9, 121.1, 116.6 (d,  $^2J_{\text{CF}} = 21.6$  Hz), 115.4 (d,  $^2J_{\text{CF}} = 21.5$  Hz) ppm;  $^{19}\text{F}$  NMR (376 MHz,  $\text{CDCl}_3$ ):  $\delta$  –109.8 (s, 1F), –111.2 to –111.3 (m, 1F), –111.6 to –111.7 (m, 1F) ppm; HRMS (EI): calcd for  $\text{C}_{21}\text{H}_{12}\text{F}_3\text{NS}$   $[\text{M}-\text{H}]^+$ : 366.0564, found: 366.0559.

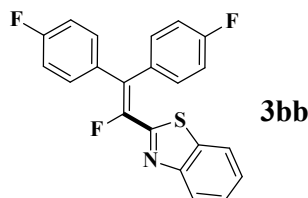

**2-(2,2-Di-3-fluorophenyl-1-fluorovinyl)benzo[d]thiazole (3db):** White solid. Yield: 90%, mp 114.3–115.4 °C.  $^1\text{H}$  NMR (400 MHz,  $\text{CDCl}_3$ ):  $\delta$  7.94 (s, 1H), 7.65 (s, 1H), 7.37–6.98 (m, 10H) ppm;  $^{13}\text{C}$  NMR (100 MHz,  $\text{CDCl}_3$ ):  $\delta$  163.3 (d,  $^1J_{\text{CF}} = 246.9$  Hz), 162.6 (d,  $^1J_{\text{CF}} = 244.4$  Hz), 158.6 (d,  $^2J_{\text{CF}} = 29.2$  Hz), 152.2, 149.3 (d,  $^1J_{\text{CF}} = 255.4$  Hz), 138.0 (dd,  $^3J_{\text{CF}} = 8.0$  Hz,  $^3J_{\text{CF}} = 2.3$  Hz), 137.8 (dd,  $^3J_{\text{CF}} = 7.8$  Hz,  $^3J_{\text{CF}} = 6.4$  Hz), 135.6, 131.1 (d,  $^3J_{\text{CF}} = 8.3$  Hz), 129.8 (d,  $^3J_{\text{CF}} = 8.2$  Hz), 126.9–126.8 (m), 126.6, 126.2, 125.6–125.5 (m), 124.1, 121.1, 118.1 (dd,  $^2J_{\text{CF}} = 21.7$  Hz,  $^4J_{\text{CF}} = 3.3$  Hz), 116.8 (d,  $^2J_{\text{CF}} = 22.9$  Hz), 116.7 (d,  $^2J_{\text{CF}} = 23.0$  Hz), 116.5 (d,  $^2J_{\text{CF}} = 20.8$  Hz), 115.7 (d,  $^2J_{\text{CF}} = 20.9$  Hz) ppm;  $^{19}\text{F}$  NMR (376 MHz,  $\text{CDCl}_3$ ):  $\delta$  –107.9 (s, 1F), –111.2 to –111.3 (m, 1F), –112.5 to –112.6 (m, 1F) ppm; HRMS (EI): calcd for  $\text{C}_{21}\text{H}_{12}\text{F}_3\text{NS}$   $[\text{M}-\text{H}]^+$ : 366.0564, found: 366.0576.

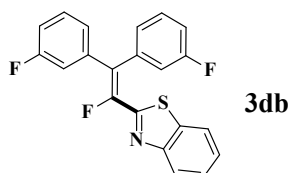

**2-(2,2-Di-4-methylphenyl-1-fluorovinyl)benzo[d]thiazole (3fb):** White solid. Yield: 70%, mp 138.7–140.1 °C. <sup>1</sup>H NMR (400 MHz, CDCl<sub>3</sub>): δ 8.03 (d, *J* = 8.4 Hz, 1H), 7.62 (d, *J* = 8.0 Hz, 1H), 7.42–7.38 (m, 1H), 7.35 (d, *J* = 7.6 Hz, 2H), 7.30–7.20 (m, 5H), 7.14 (d, *J* = 8.4 Hz, 2H), 2.44 (s, 3H), 2.33 (s, 3H) ppm; <sup>13</sup>C NMR (100 MHz, CDCl<sub>3</sub>): δ 159.8 (d, <sup>2</sup>*J*<sub>CF</sub> = 27.1 Hz), 152.1, 148.4 (d, <sup>1</sup>*J*<sub>CF</sub> = 253.4 Hz), 139.4, 138.6 (d, <sup>5</sup>*J*<sub>CF</sub> = 1.0 Hz), 135.8 (d, <sup>4</sup>*J*<sub>CF</sub> = 1.8 Hz), 134.0 (d, <sup>4</sup>*J*<sub>CF</sub> = 2.5 Hz), 133.3 (d, <sup>3</sup>*J*<sub>CF</sub> = 6.4 Hz), 131.0 (d, <sup>4</sup>*J*<sub>CF</sub> = 3.0 Hz), 130.2, 130.0 (d, <sup>3</sup>*J*<sub>CF</sub> = 6.5 Hz), 129.1 (d, <sup>2</sup>*J*<sub>CF</sub> = 13.8 Hz), 129.0, 126.3, 125.7, 123.7, 121.0, 121.6, 121.4 ppm; <sup>19</sup>F NMR (376 MHz, CDCl<sub>3</sub>): δ –111.6 (s, 1F); HRMS (EI): calcd for C<sub>23</sub>H<sub>18</sub>FNS [M–H]<sup>+</sup>: 358.1066, found: 358.1069.

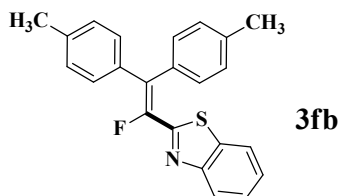

**(*E/Z*)-2-(2-(4-Fluorophenyl)-2-phenyl-1-fluorovinyl)benzo[d]thiazole (3gb):** White solid. Yield: 92%. A mixture of *E*- and *Z*-isomers (4:3, the *E/Z* ratio was determined by <sup>19</sup>F NMR spectroscopy). <sup>1</sup>H NMR (400 MHz, CDCl<sub>3</sub>): δ 8.03–8.00 (m, 1H), 7.72–7.65 (m, 1H), 7.50–7.30 (m, 9H), 7.18–7.02 (m, 2H) ppm; <sup>13</sup>C NMR (100 MHz, CDCl<sub>3</sub>): δ 163.5 (d, <sup>1</sup>*J*<sub>CF</sub> = 247.7 Hz), 162.5 (d, <sup>1</sup>*J*<sub>CF</sub> = 250.2 Hz), 159.2 (d, <sup>2</sup>*J*<sub>CF</sub> = 27.6 Hz), 159.1 (d, <sup>2</sup>*J*<sub>CF</sub> = 29.2 Hz), 152.2, 152.1, 148.8 (d, <sup>1</sup>*J*<sub>CF</sub> = 253.2 Hz), 148.6 (d, <sup>1</sup>*J*<sub>CF</sub> = 253.9 Hz), 136.1, 136.0, 135.7 (d, <sup>4</sup>*J*<sub>CF</sub> = 1.7 Hz), 135.1 (d, <sup>4</sup>*J*<sub>CF</sub> = 1.7 Hz), 133.6 (dd, <sup>3</sup>*J*<sub>CF</sub> = 8.3 Hz, <sup>4</sup>*J*<sub>CF</sub> = 3.1 Hz), 131.9 (dd, <sup>3</sup>*J*<sub>CF</sub> = 8.2 Hz, <sup>4</sup>*J*<sub>CF</sub> = 6.7 Hz), 132.7–132.6 (m), 132.4–132.3 (m), 131.1 (d, <sup>3</sup>*J*<sub>CF</sub> = 3.0 Hz), 129.5 (d, <sup>3</sup>*J*<sub>CF</sub> = 6.2 Hz), 129.5, 129.4, 128.7, 128.4, 127.7 (d, <sup>2</sup>*J*<sub>CF</sub> = 12.9 Hz), 127.6 (d, <sup>2</sup>*J*<sub>CF</sub> = 14.8 Hz), 126.5, 126.4, 126.0, 125.9, 123.9, 123.8, 121.1, 121.0, 116.5 (d, <sup>2</sup>*J*<sub>CF</sub> = 21.5 Hz), 115.4 (d, <sup>2</sup>*J*<sub>CF</sub> = 21.5 Hz) ppm; <sup>19</sup>F NMR (376 MHz, CDCl<sub>3</sub>): δ –109.7 (s), –111.0 (s), –111.6 to –111.7 (m), –112.0 to –112.1 (m); HRMS (EI): calcd for C<sub>21</sub>H<sub>13</sub>F<sub>2</sub>NS [M–H]<sup>+</sup>: 348.0659, found: 348.0660.

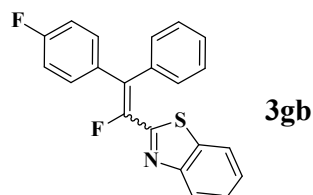

**2-(2,2-Diphenyl-1-fluorovinyl)benzo[d]oxazole (3ac):** White solid. Yield: 57%, mp 111.2–112.0 °C. <sup>1</sup>H NMR (400 MHz, CDCl<sub>3</sub>): δ 7.76–7.74 (m, 1H), 7.47–7.36 (m, 8H), 7.35–7.27 (m, 5H) ppm; <sup>13</sup>C NMR (100 MHz, CDCl<sub>3</sub>): δ 157.1 (d, <sup>2</sup>*J*<sub>CF</sub> = 37.6 Hz), 150.1 (d, <sup>4</sup>*J*<sub>CF</sub> = 1.0 Hz), 142.7 (d, <sup>1</sup>*J*<sub>CF</sub> = 246.8 Hz), 140.9, 136.6 (d, <sup>3</sup>*J*<sub>CF</sub> = 5.0 Hz), 136.5 (d, <sup>4</sup>*J*<sub>CF</sub> = 1.9 Hz), 131.1 (d, <sup>2</sup>*J*<sub>CF</sub> = 12.7 Hz), 130.5 (d, <sup>4</sup>*J*<sub>CF</sub> = 3.0 Hz), 130.2 (d, <sup>3</sup>*J*<sub>CF</sub> = 5.3 Hz), 128.8, 128.5, 128.4, 128.3, 126.0, 124.9, 120.7, 110.7 ppm; <sup>19</sup>F NMR (376 MHz, CDCl<sub>3</sub>): δ –120.3 (s, 1F) ppm; HRMS (EI): calcd for C<sub>21</sub>H<sub>14</sub>FNO [M–H]<sup>+</sup>: 314.0981, found: 314.0985.

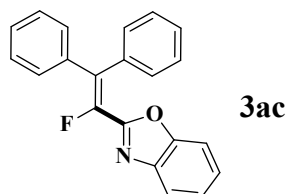

**2-(2,2-Di-4-fluorophenyl-1-fluorovinyl)benzo[d]oxazole (3bc):** White solid. Yield: 58%, mp 106.3–107.4 °C. <sup>1</sup>H NMR (400 MHz, CDCl<sub>3</sub>): δ 7.75–7.73 (m, 1H), 7.44–7.41 (m, 2H), 7.36–7.33 (m, 3H), 7.27–7.24 (m, 2H), 7.13–7.08 (m, 4H) ppm; <sup>13</sup>C NMR (100 MHz, CDCl<sub>3</sub>): δ 163.0 (d, <sup>1</sup>*J*<sub>CF</sub> = 247.0 Hz), 162.8 (d, <sup>1</sup>*J*<sub>CF</sub> = 248.8 Hz),

156.6 (d,  $^2J_{\text{CF}} = 37.4$  Hz), 150.1, 142.8 (d,  $^1J_{\text{CF}} = 247.3$  Hz), 140.8, 132.3 (dd,  $^3J_{\text{CF}} = 8.2$  Hz,  $^4J_{\text{CF}} = 3.1$  Hz), 132.1 (dd,  $^3J_{\text{CF}} = 8.3$  Hz,  $^4J_{\text{CF}} = 5.6$  Hz), 130.5–130.1 (m), 128.9 (d,  $^2J_{\text{CF}} = 13.1$  Hz), 128.5–128.4 (m), 126.2, 125.0, 120.7, 115.6 (d,  $^2J_{\text{CF}} = 21.6$  Hz), 115.5 (d,  $^2J_{\text{CF}} = 21.5$  Hz), 110.7 ppm;  $^{19}\text{F}$  NMR (376 MHz,  $\text{CDCl}_3$ ):  $\delta$  -111.3 to -111.4 (m, 1F), -112.4 to -112.5 (m, 1F), -120.0 (s, 1F) ppm; HRMS (EI): calcd for  $\text{C}_{21}\text{H}_{12}\text{F}_3\text{NO}$   $[\text{M}-\text{H}]^+$ : 350.0793, found: 350.0798.

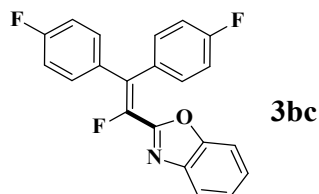

**2-(2,2-Di-4-chlorophenyl-1-fluorovinyl)benzo[d]oxazole (3cc):** White solid. Yield: 54%, mp 158.5–159.4 °C.  $^1\text{H}$  NMR (400 MHz,  $\text{CDCl}_3$ ):  $\delta$  7.76–7.73 (m, 1H), 7.40–7.35 (m, 9H), 7.22–7.20 (m, 2H) ppm;  $^{13}\text{C}$  NMR (100 MHz,  $\text{CDCl}_3$ ):  $\delta$  156.4 (d,  $^2J_{\text{CF}} = 37.2$  Hz), 150.1, 143.1 (d,  $^1J_{\text{CF}} = 248.8$  Hz), 140.8, 135.1, 134.9, 134.7 (d,  $^3J_{\text{CF}} = 5.2$  Hz), 134.5 (d,  $^4J_{\text{CF}} = 1.9$  Hz), 131.8 (d,  $^4J_{\text{CF}} = 3.0$  Hz), 131.4 (d,  $^3J_{\text{CF}} = 5.6$  Hz), 128.8, 128.7, 128.6 (d,  $^2J_{\text{CF}} = 11.7$  Hz), 126.4, 125.1, 120.8, 110.8 ppm;  $^{19}\text{F}$  NMR (376 MHz,  $\text{CDCl}_3$ ):  $\delta$  -118.7 (s, 1F) ppm; HRMS (EI): calcd for  $\text{C}_{21}\text{H}_{12}\text{Cl}_2\text{FNO}$   $[\text{M}-\text{H}]^+$ : 382.0202, found: 382.0208.

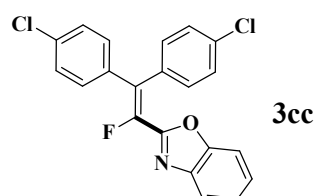

**(E/Z)-2-(2-(4-Fluorophenyl)-2-phenyl-1-fluorovinyl)benzo[d]oxazole (3gc):** White solid. Yield: 70%. A mixture of *E*- and *Z*-isomers (4:3, the *E/Z* ratio was determined by  $^{19}\text{F}$  NMR spectroscopy).  $^1\text{H}$  NMR (400 MHz,  $\text{CDCl}_3$ ):  $\delta$  7.75–7.73 (m, 1H), 7.46–7.32 (m, 8H), 7.28–7.25 (m, 2H), 7.12–7.07 (m, 2H) ppm;  $^{13}\text{C}$  NMR (100 MHz,  $\text{CDCl}_3$ ):  $\delta$  163.0 (d,  $^1J_{\text{CF}} = 246.7$  Hz), 162.7 (d,  $^1J_{\text{CF}} = 250.0$  Hz), 156.9 (d,  $^2J_{\text{CF}} = 37.6$  Hz), 156.8 (d,  $^2J_{\text{CF}} = 37.4$  Hz), 150.1, 140.9, 142.8 (d,  $^1J_{\text{CF}} = 248.0$  Hz), 142.7 ( $^1J_{\text{CF}} = 246.8$  Hz), 136.4, 136.3, 136.2, 136.1, 132.6–132.5 (m), 132.5–132.4 (m), 132.3 (dd,  $^3J_{\text{CF}} = 8.3$  Hz,  $^4J_{\text{CF}} = 3.2$  Hz), 132.1 (dd,  $^3J_{\text{CF}} = 8.3$  Hz,  $^4J_{\text{CF}} = 5.7$  Hz), 130.4 (d,  $^3J_{\text{CF}} = 3.0$  Hz), 130.2 (d,  $^3J_{\text{CF}} = 5.3$  Hz), 130.1 (d,  $^2J_{\text{CF}} = 13.3$  Hz), 130.0 (d,  $^2J_{\text{CF}} = 12.4$  Hz), 128.9, 128.7, 128.5, 128.4, 126.1, 126.0, 125.0, 124.9, 120.8, 120.7, 115.5 (d,  $^2J_{\text{CF}} = 21.6$  Hz), 115.4 (d,  $^2J_{\text{CF}} = 21.5$  Hz), 110.7, 110.6 ppm;  $^{19}\text{F}$  NMR (376 MHz,  $\text{CDCl}_3$ ):  $\delta$  -111.6 to -111.7 (m), -112.8 to -112.9 (m), -119.9 (s), -120.6 (s) ppm; HRMS (EI): calcd for  $\text{C}_{21}\text{H}_{13}\text{F}_2\text{NO}$   $[\text{M}-\text{H}]^+$ : 332.0887, found: 332.0891.

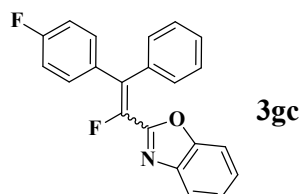

## References

- 1 M. Hu, Z. He, B. Gao, L. Li, C. Ni and J. Hu, *J. Am. Chem. Soc.*, 2013, **135**, 17302.
- 2 T. Kawano, K. Hirano, T. Satoh and M. Miura, *J. Am. Chem. Soc.*, 2010, **132**, 6900.

# $^1\text{H}$ , $^{13}\text{C}$ , $^{19}\text{F}$ NMR and HRMS (EI) spectra of compounds 3

## $^1\text{H}$ NMR Spectrum of 3aa

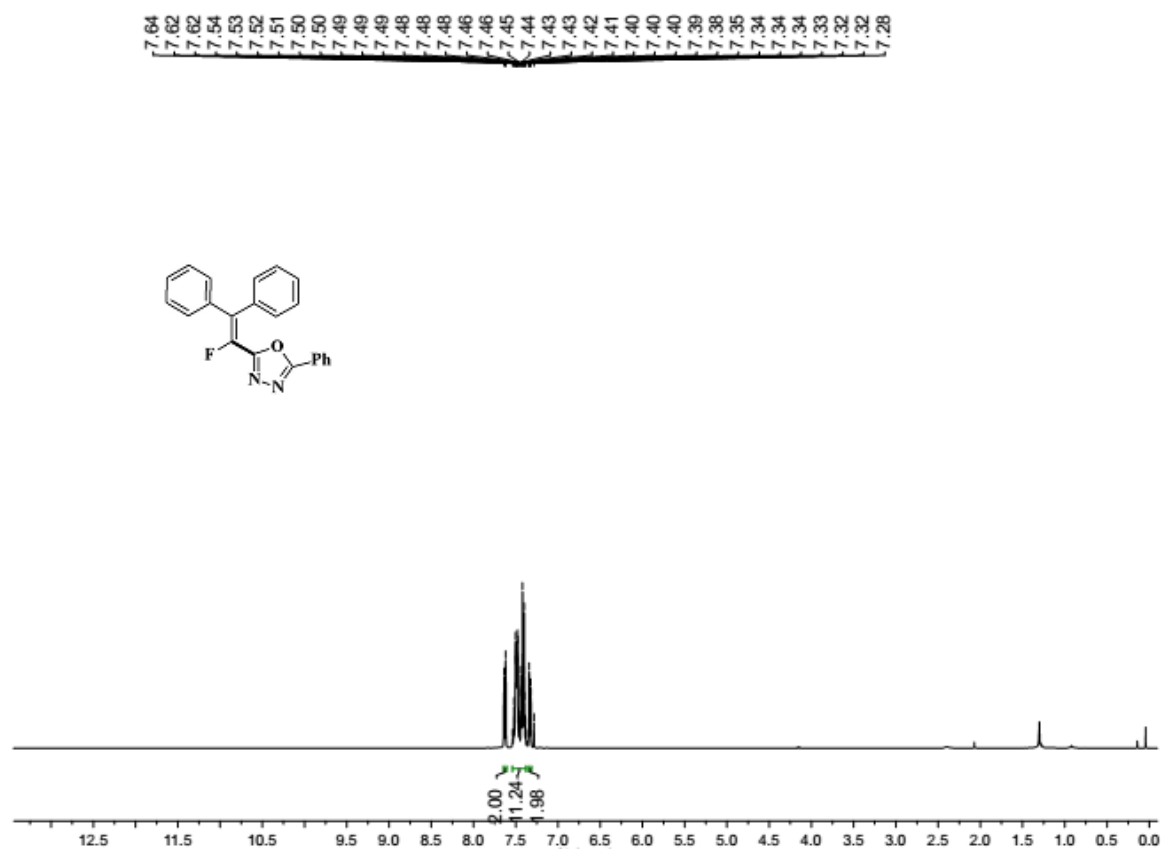

## $^{19}\text{F}$ NMR Spectrum of 3aa

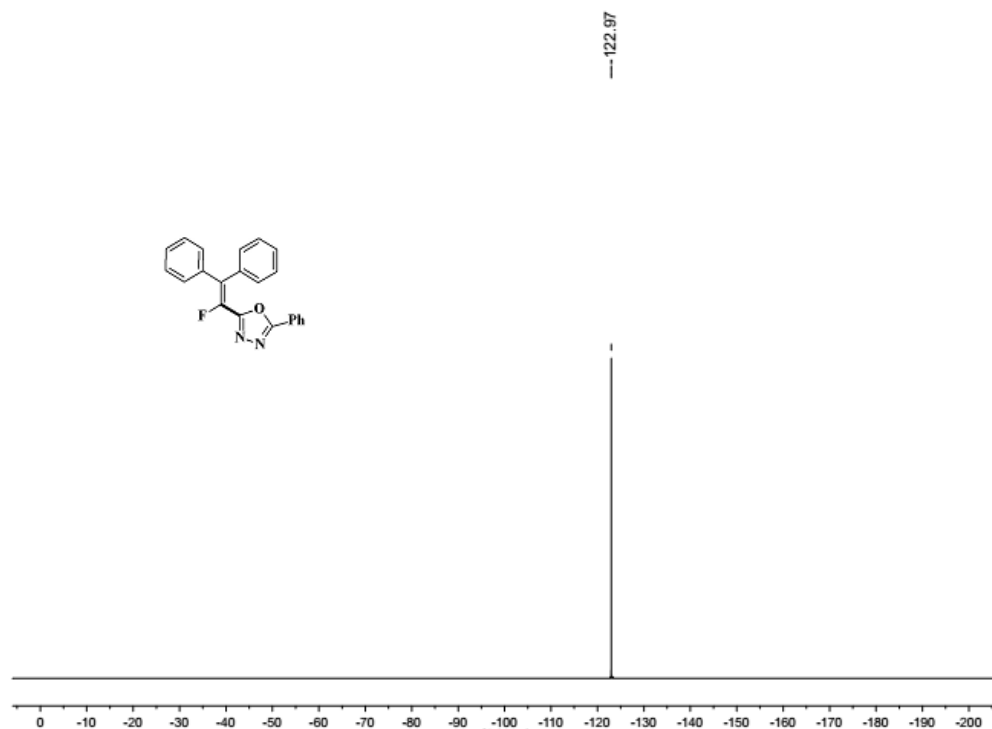

# <sup>13</sup>C NMR Spectrum of 3aa

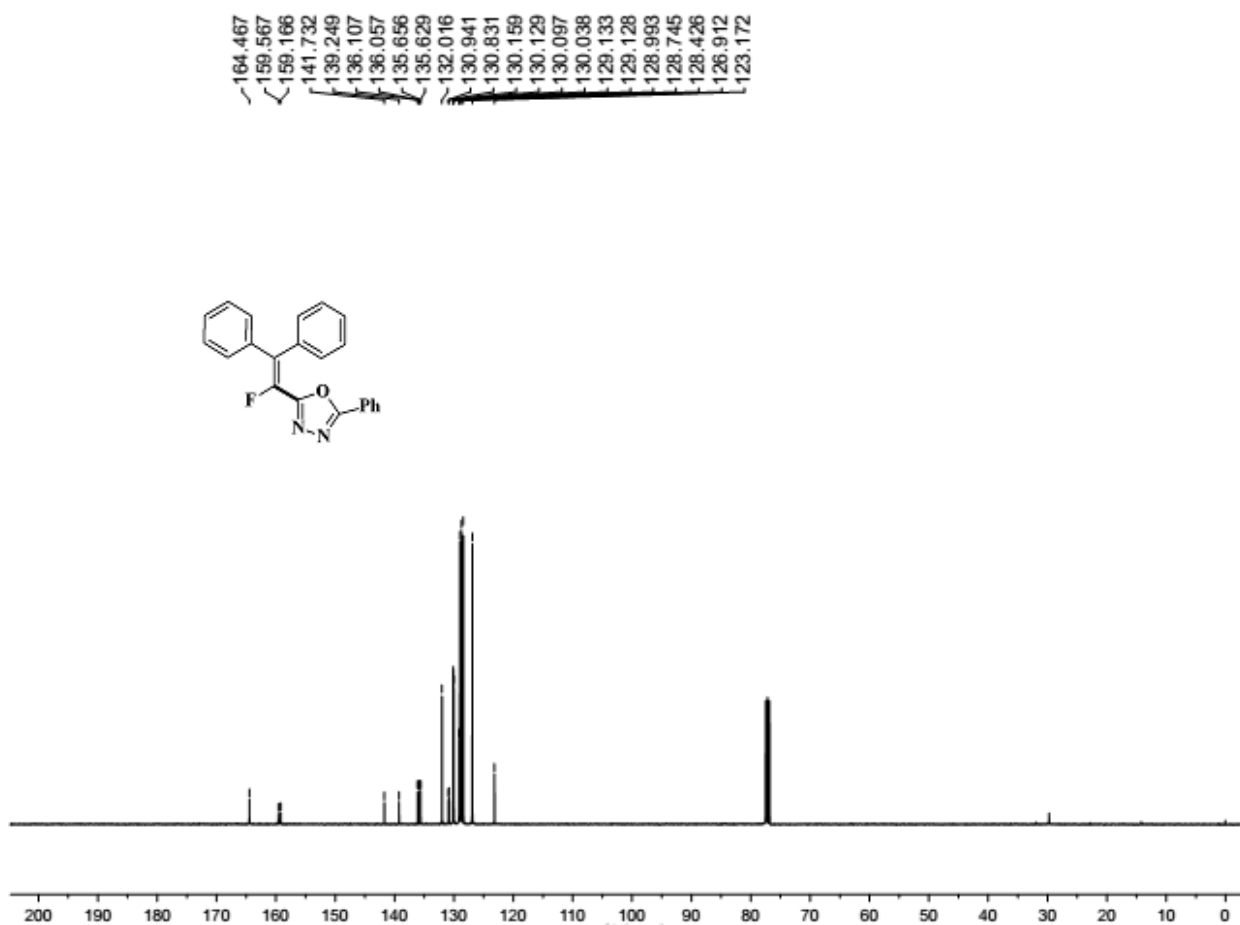

## HRMS (EI) of 3aa

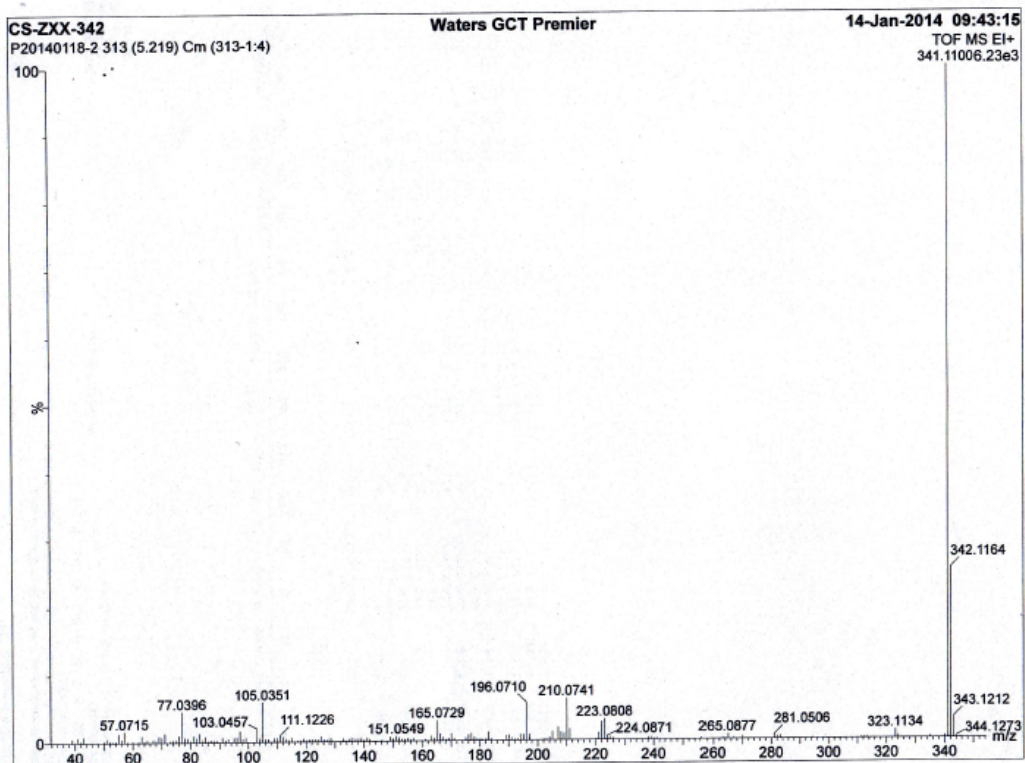

# <sup>1</sup>H NMR Spectrum of 3ba

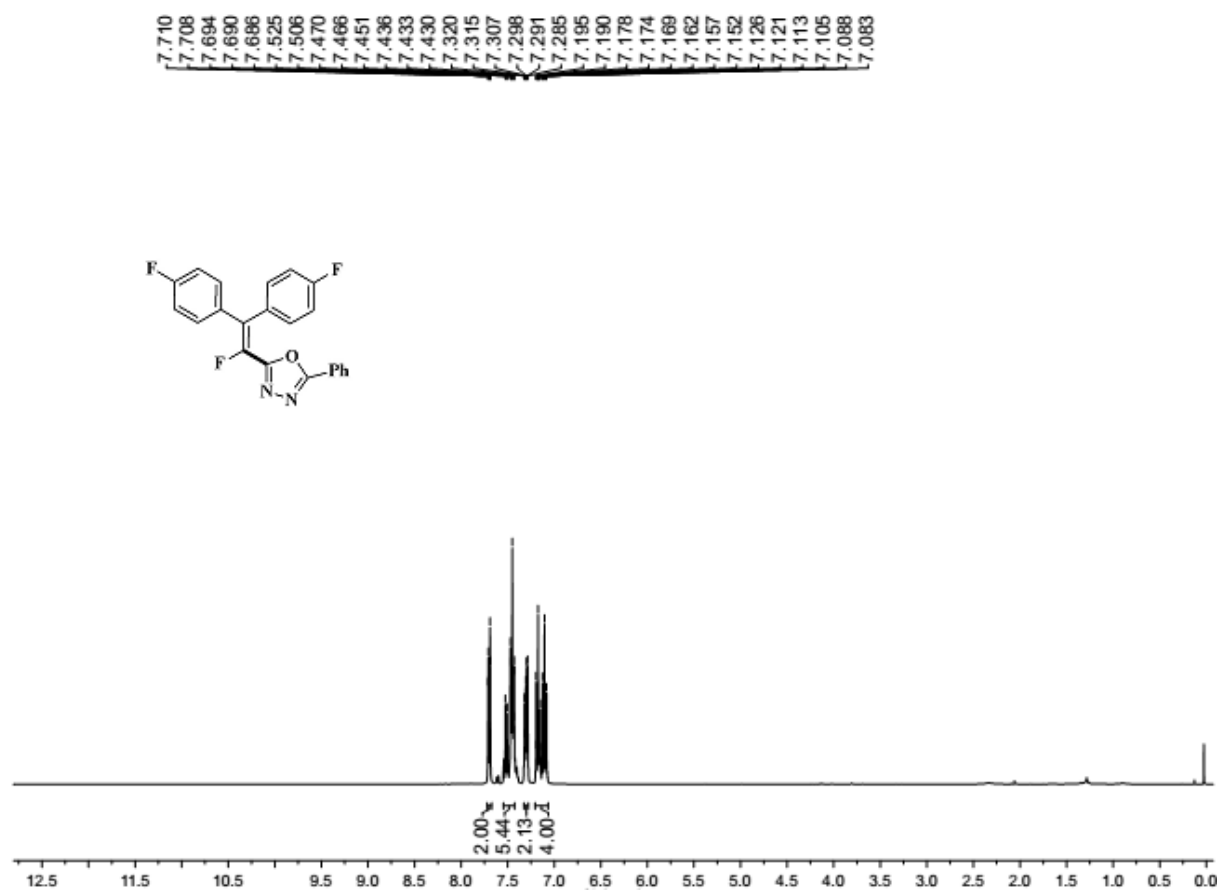

# <sup>19</sup>F NMR Spectrum of 3ba

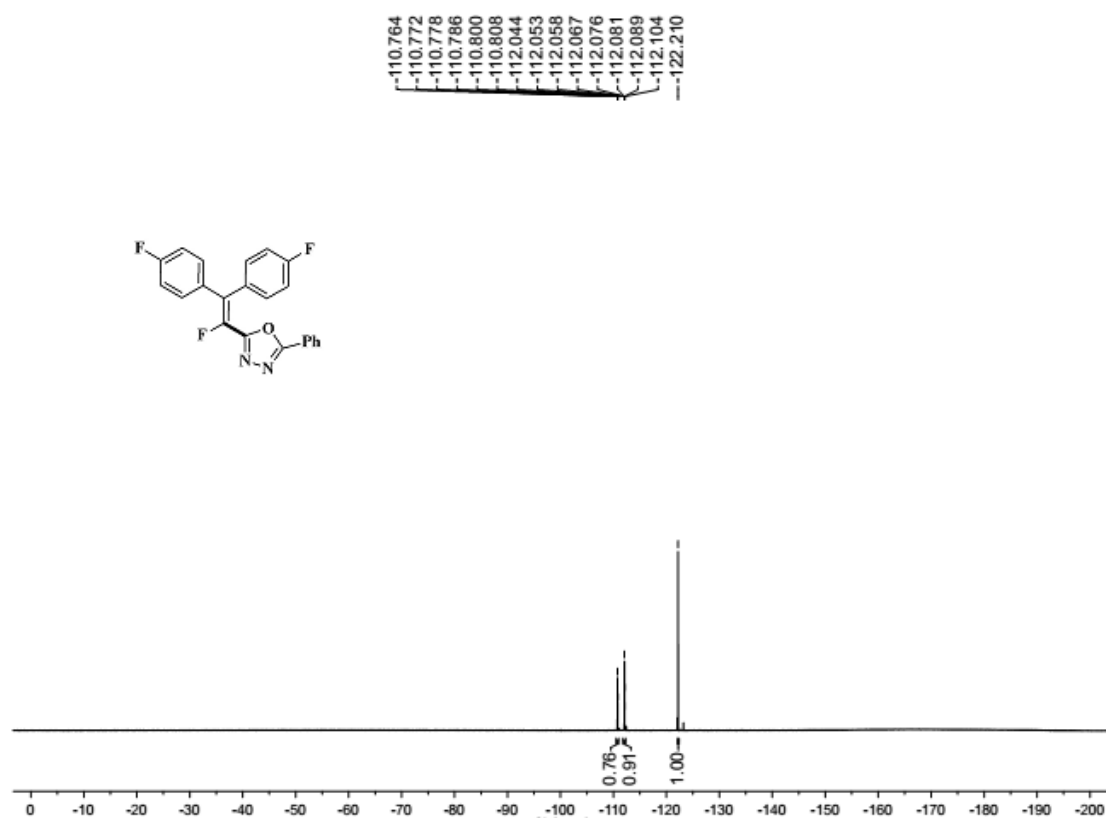

# <sup>13</sup>C NMR Spectrum of 3ba

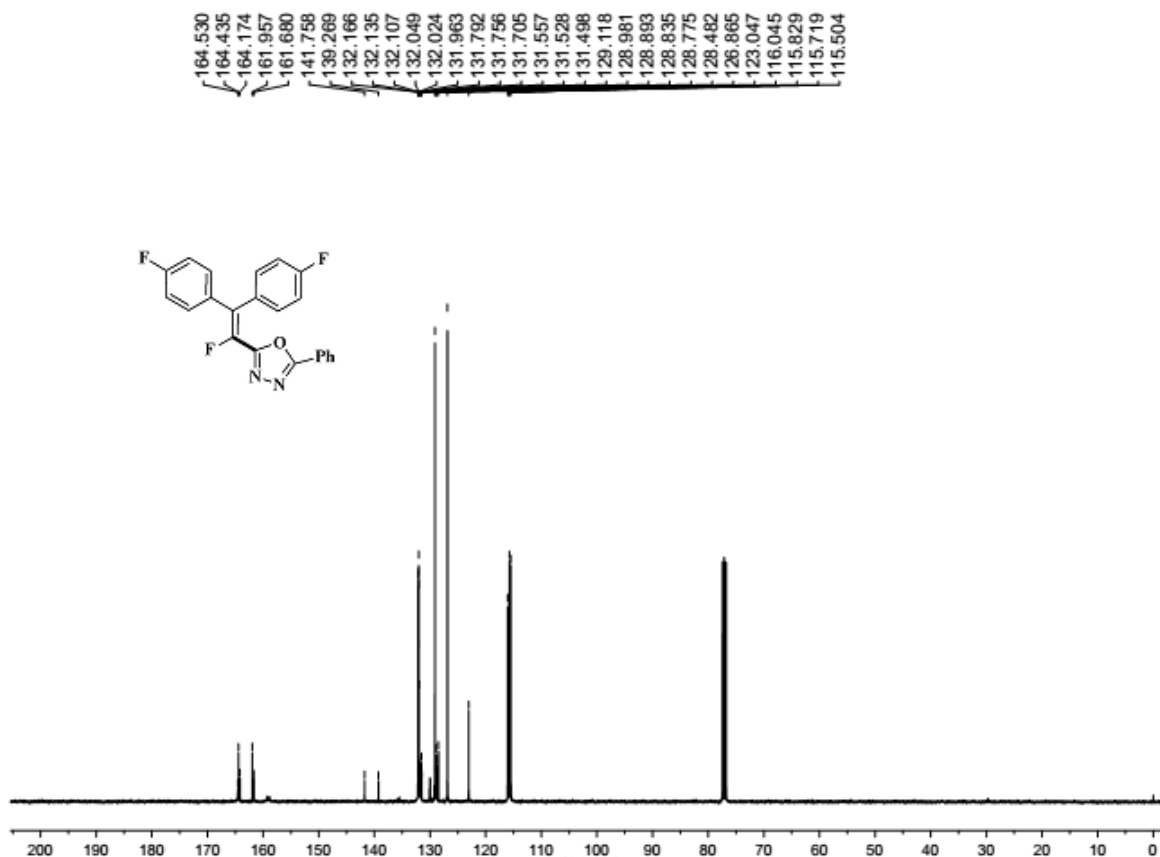

## HRMS (EI) of 3ba

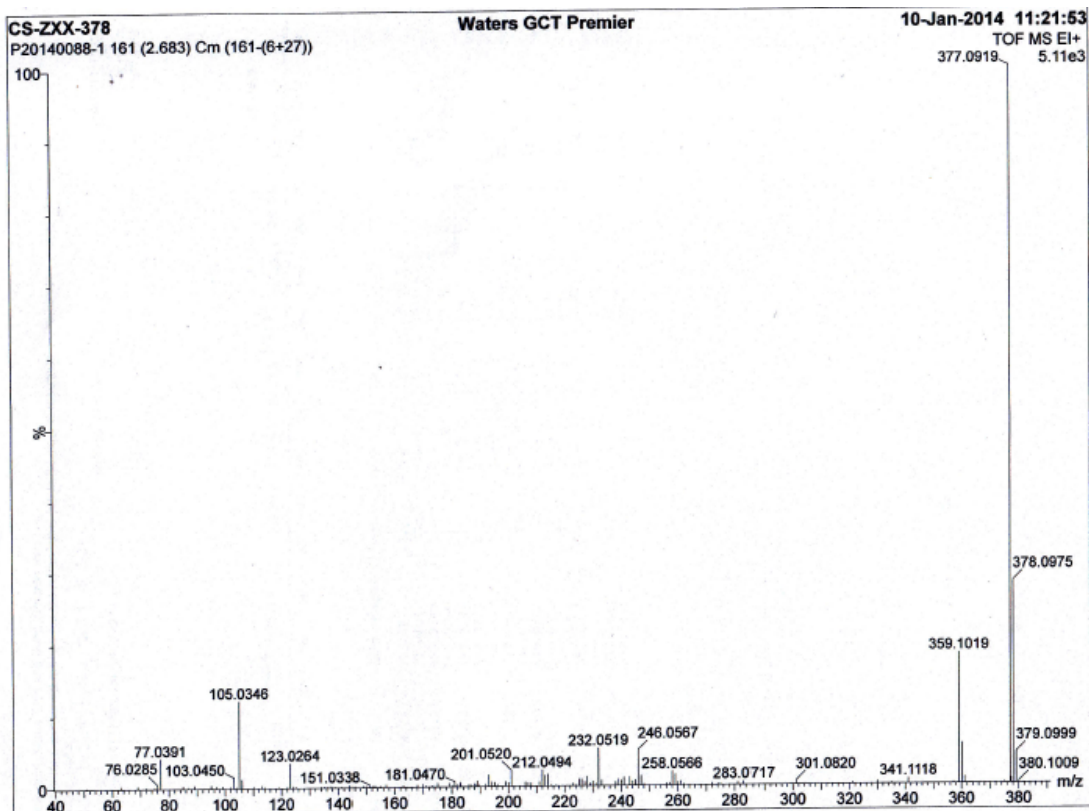

# <sup>1</sup>H NMR Spectrum of 3ca

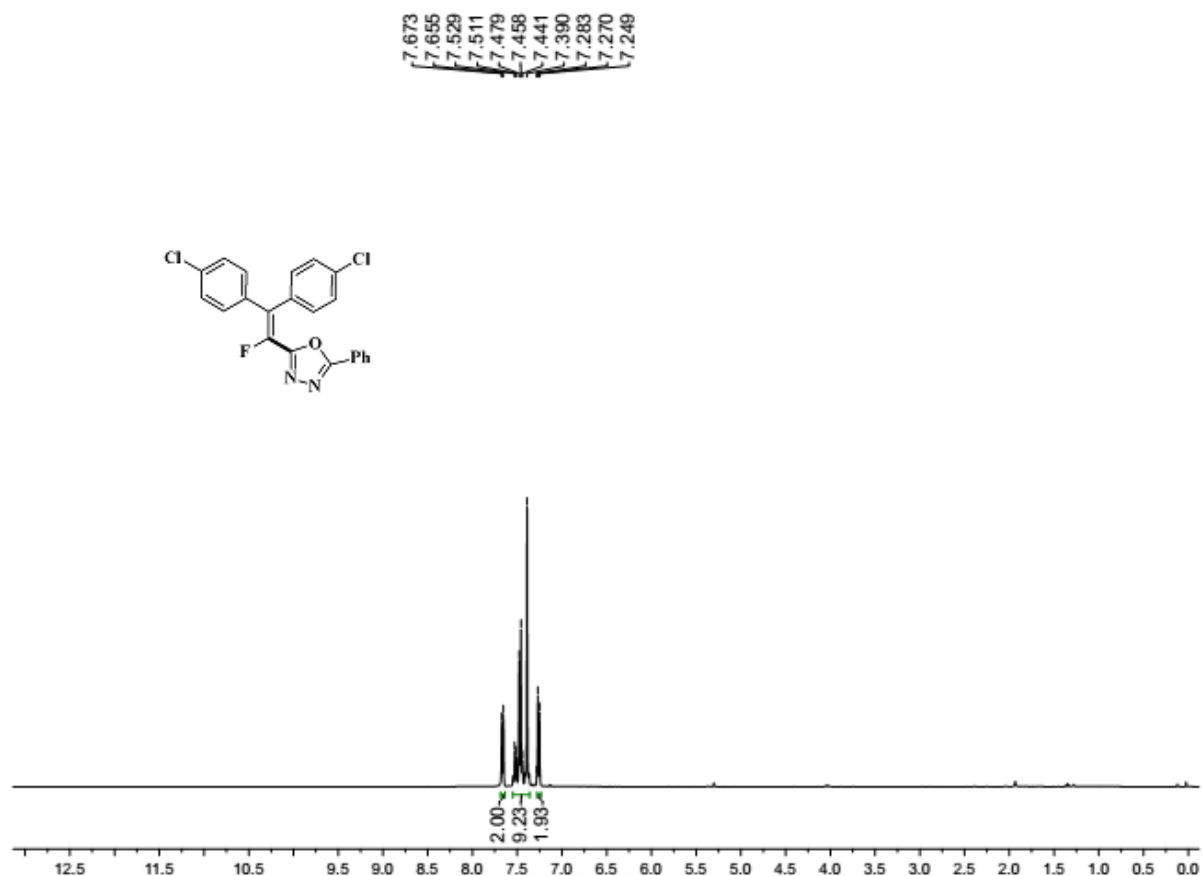

# <sup>19</sup>F NMR Spectrum of 3ca

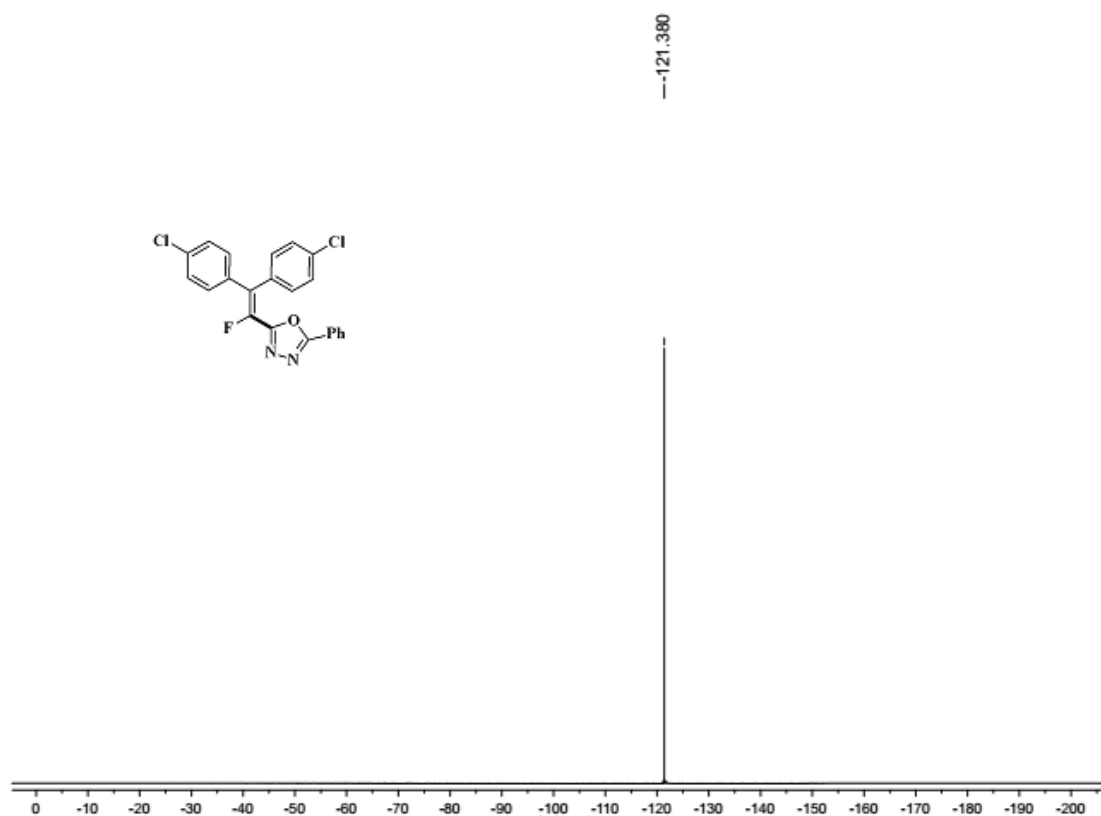

# <sup>13</sup>C NMR Spectrum of 3ca

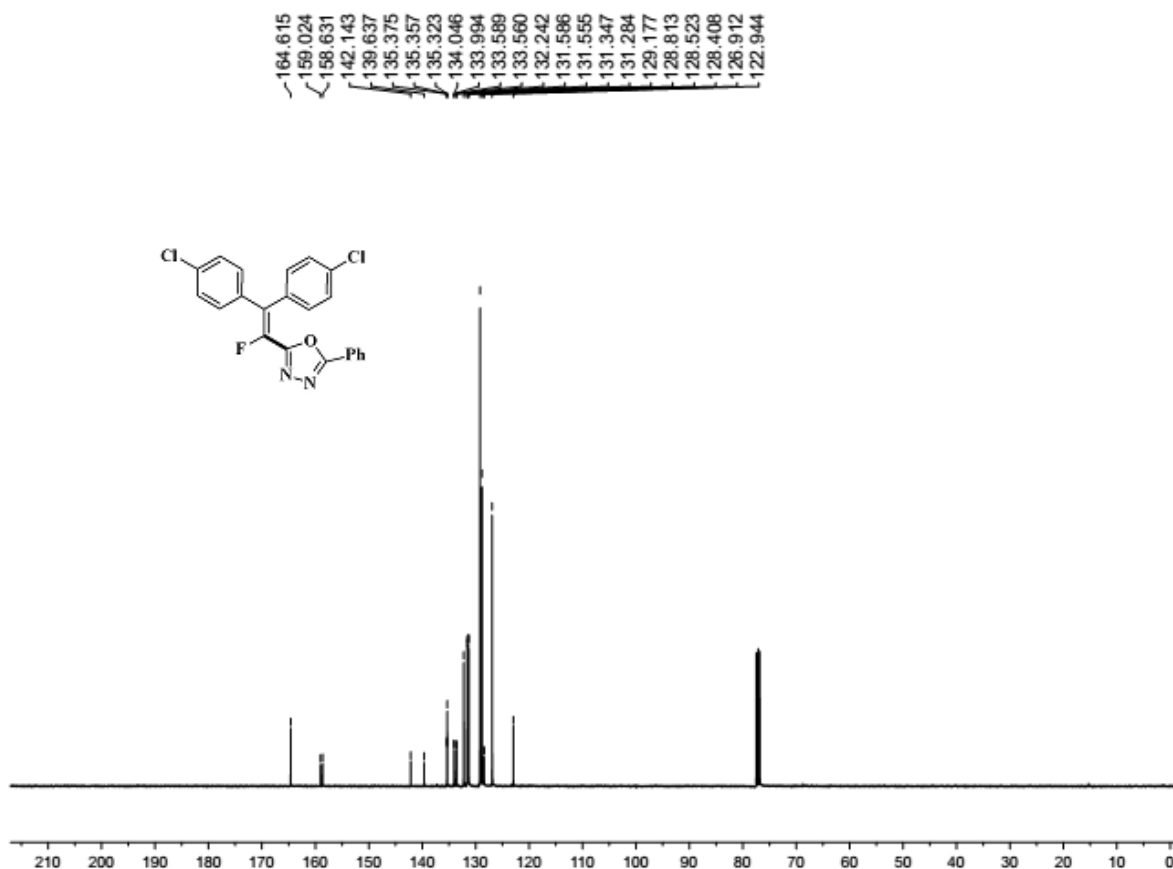

## HRMS (EI) of 3ca

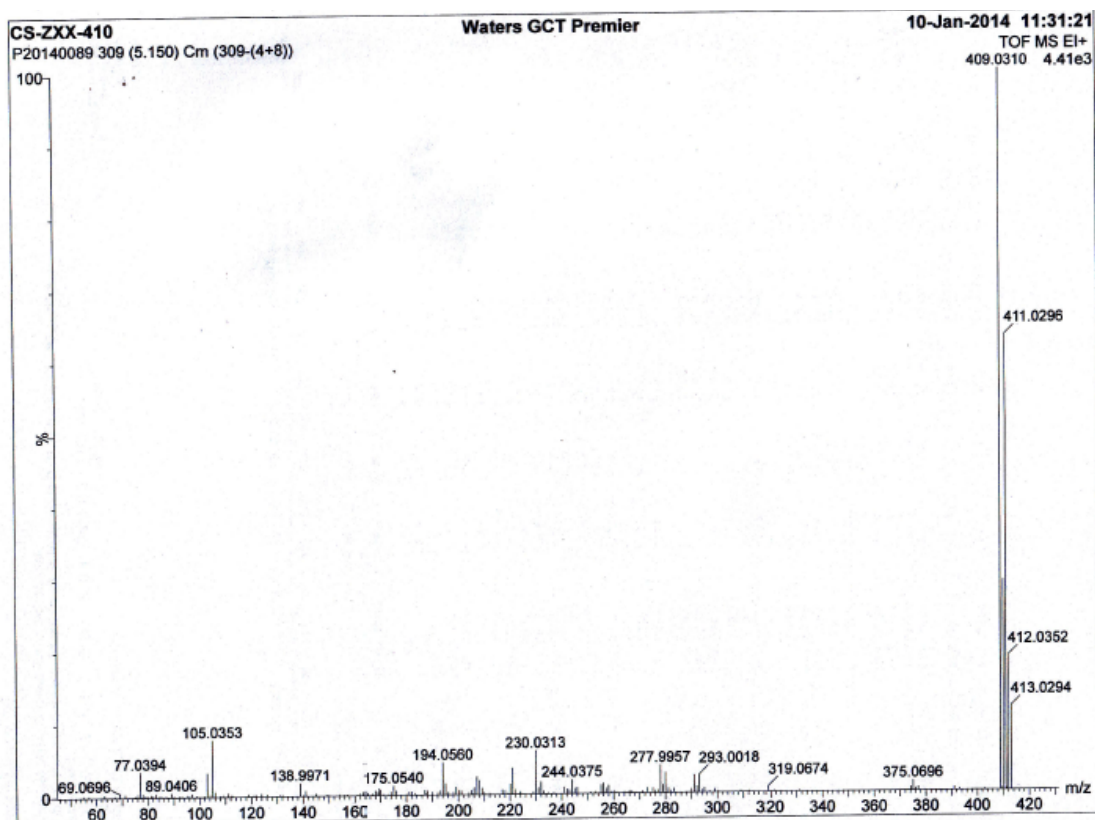

### <sup>1</sup>H NMR Spectrum of 3da

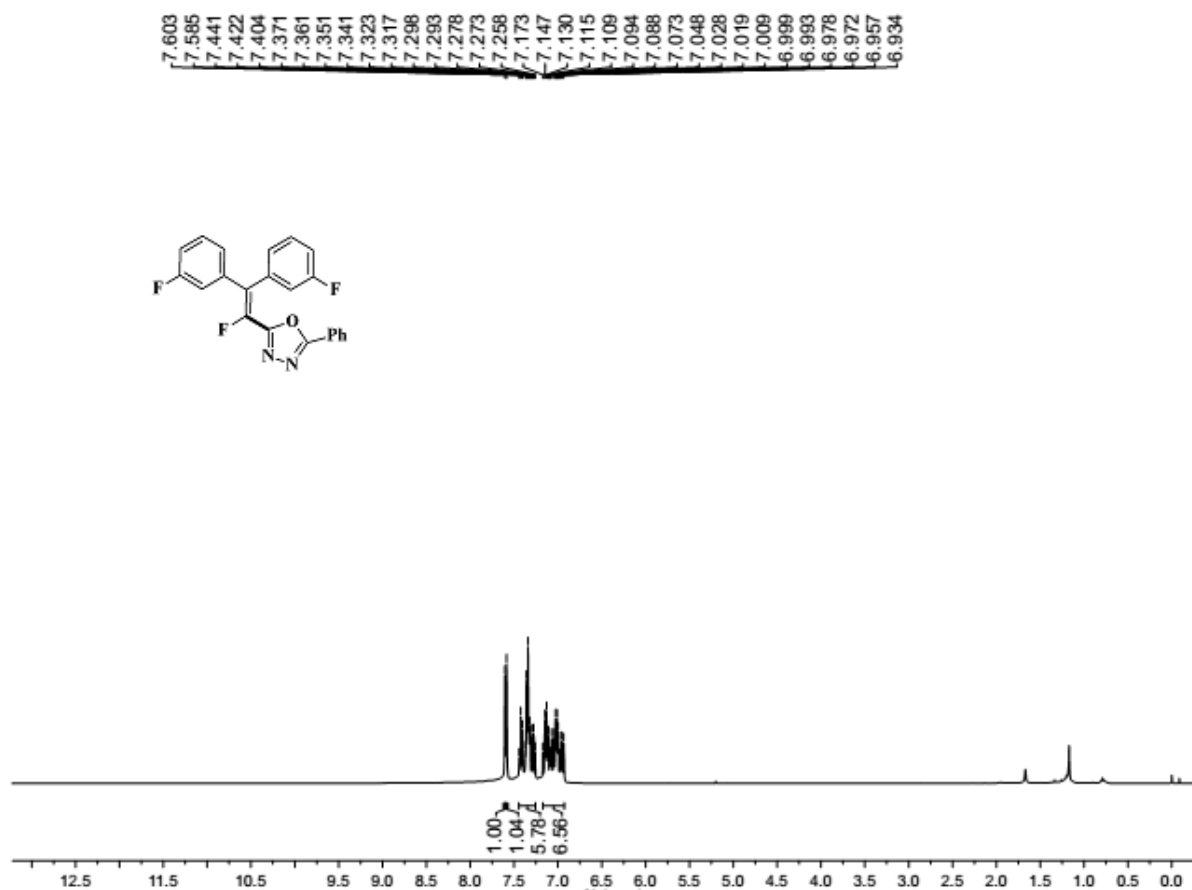

### <sup>19</sup>F NMR Spectrum of 3da

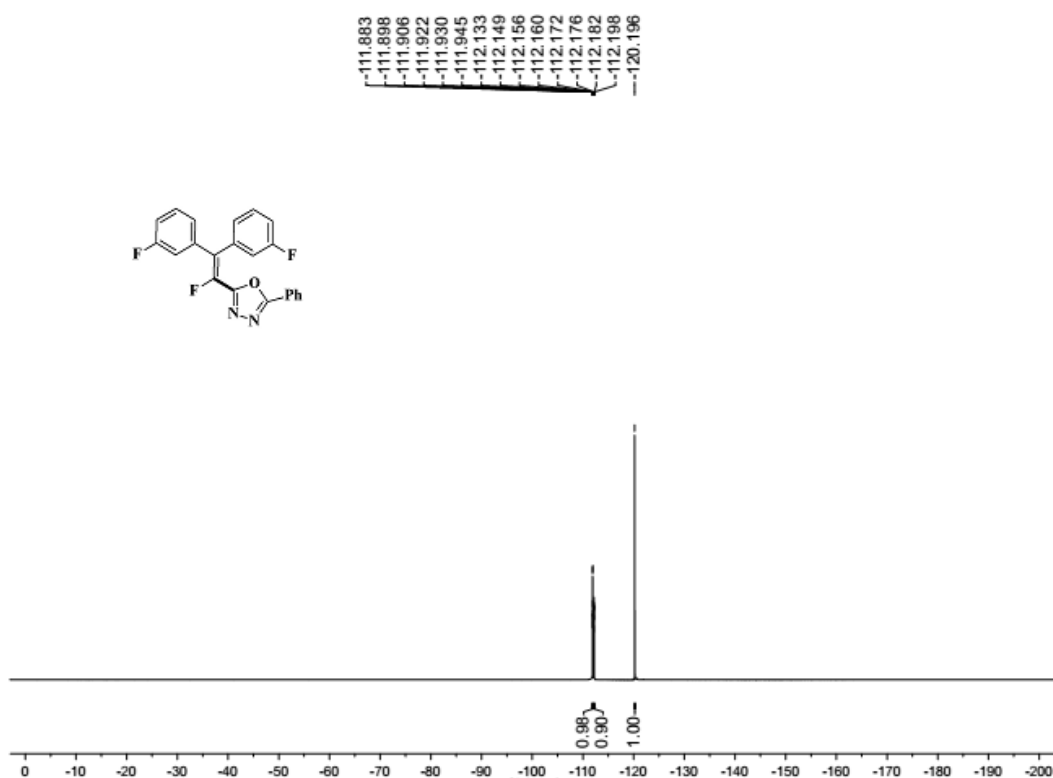

# <sup>13</sup>C NMR Spectrum of 3da

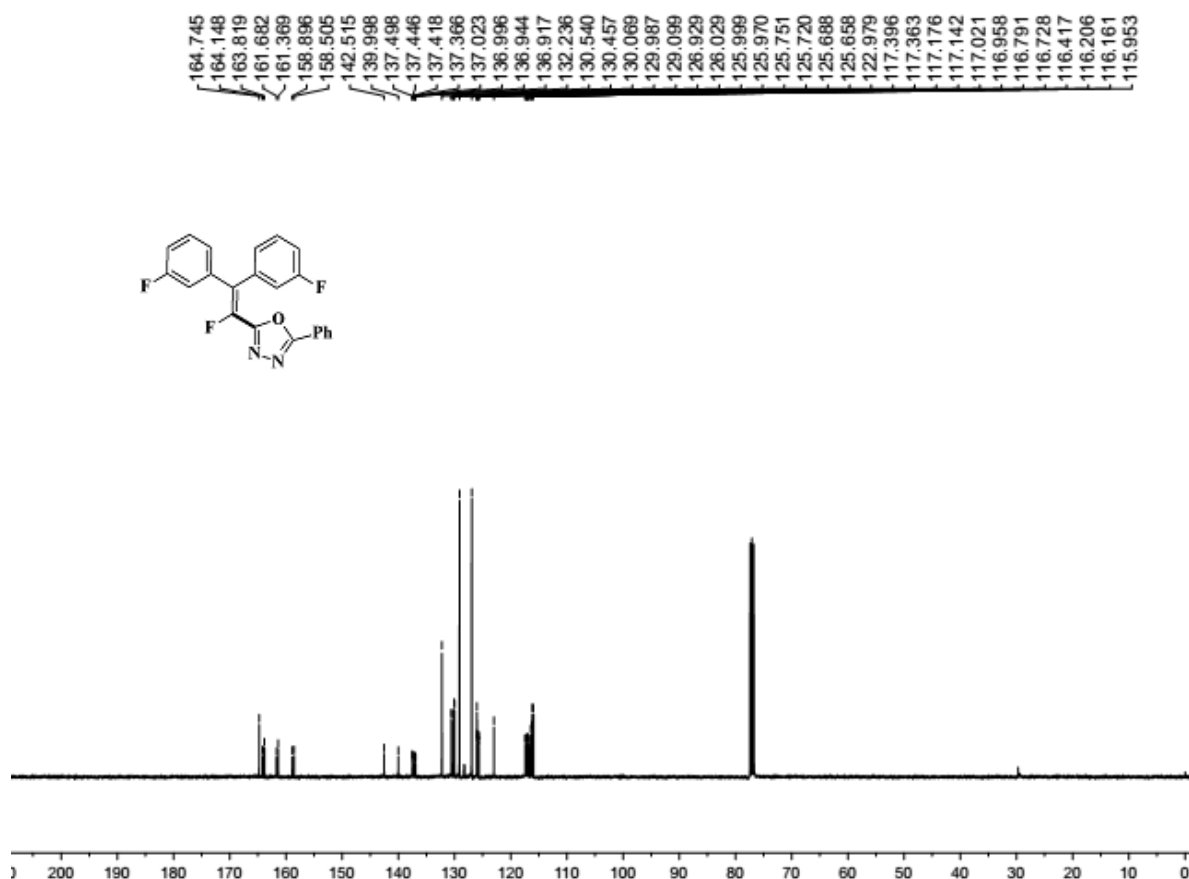

## HRMS (EI) of 3da

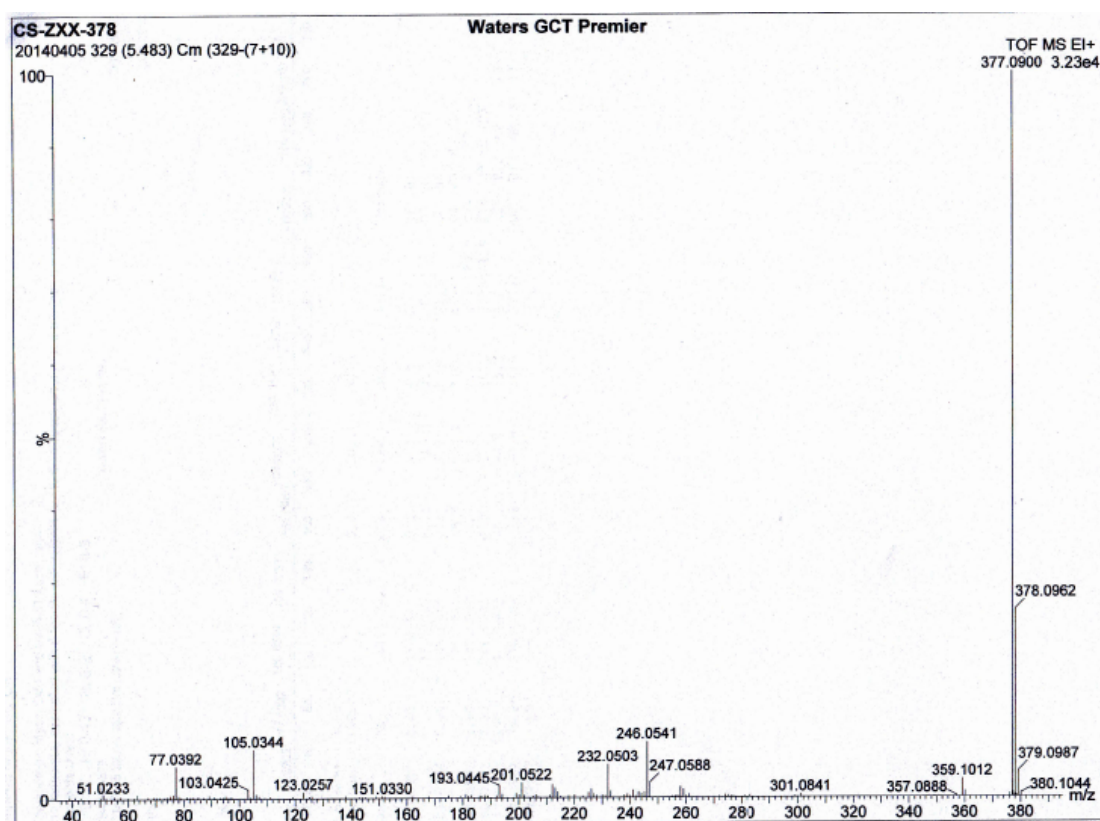

# <sup>1</sup>H NMR Spectrum of 3ea

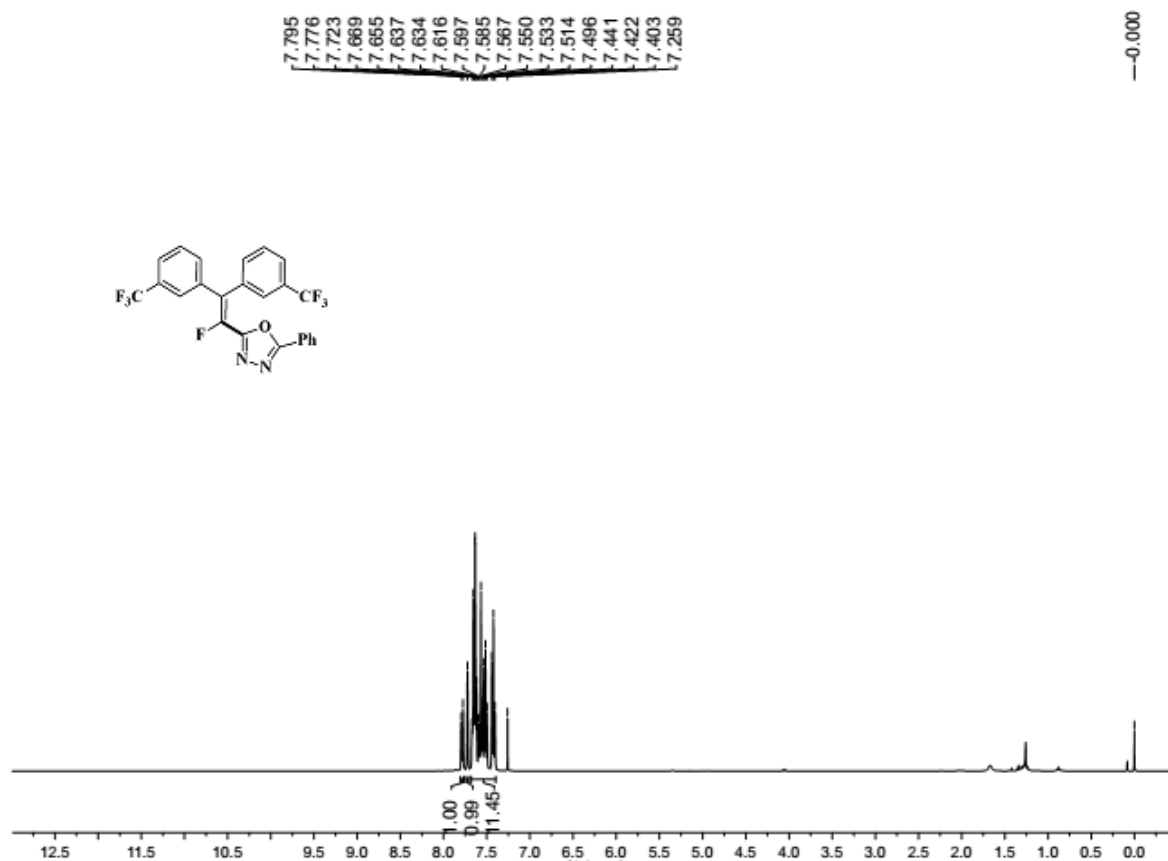

# <sup>19</sup>F NMR Spectrum of 3ea

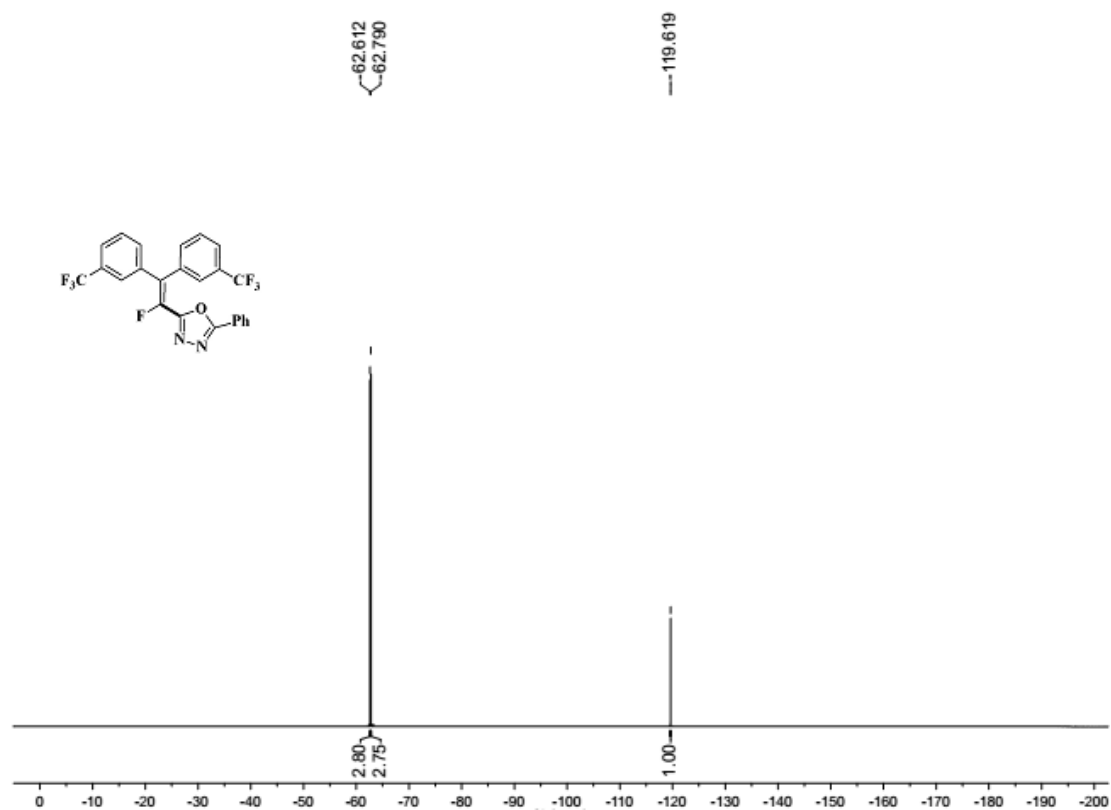

# <sup>13</sup>C NMR Spectrum of 3ea

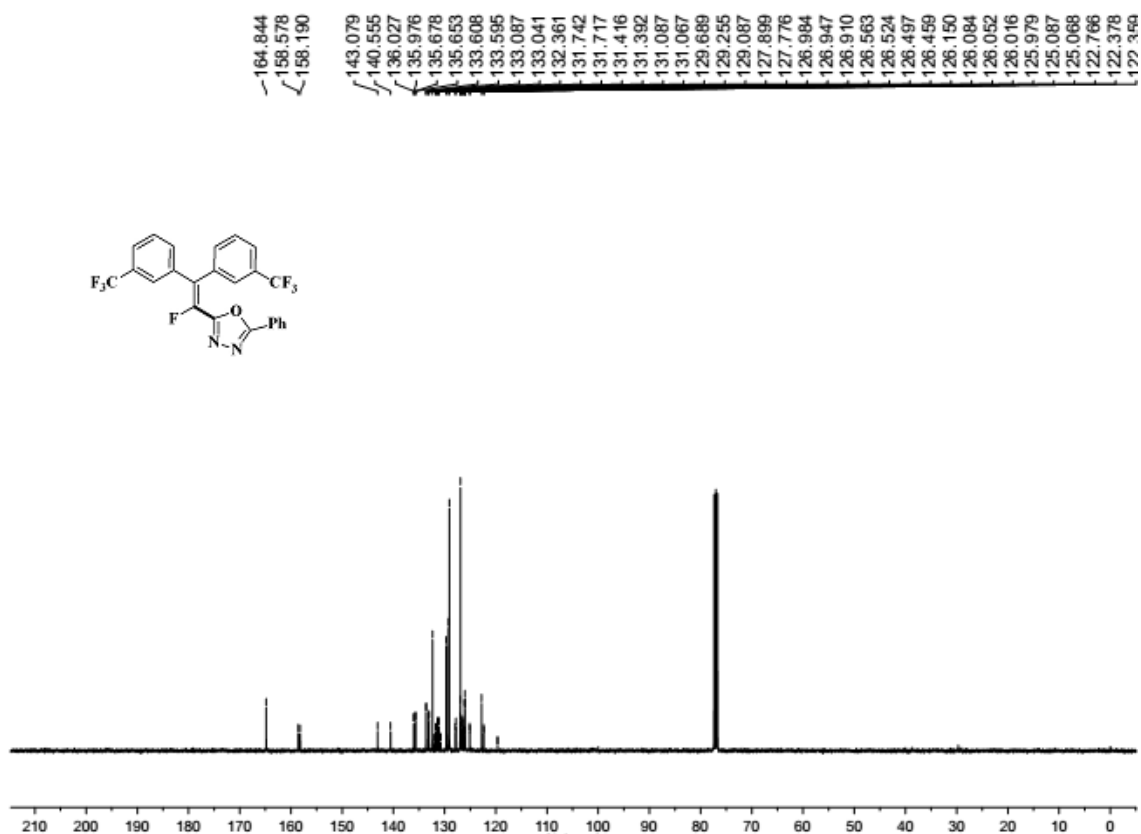

## HRMS (EI) of 3ea

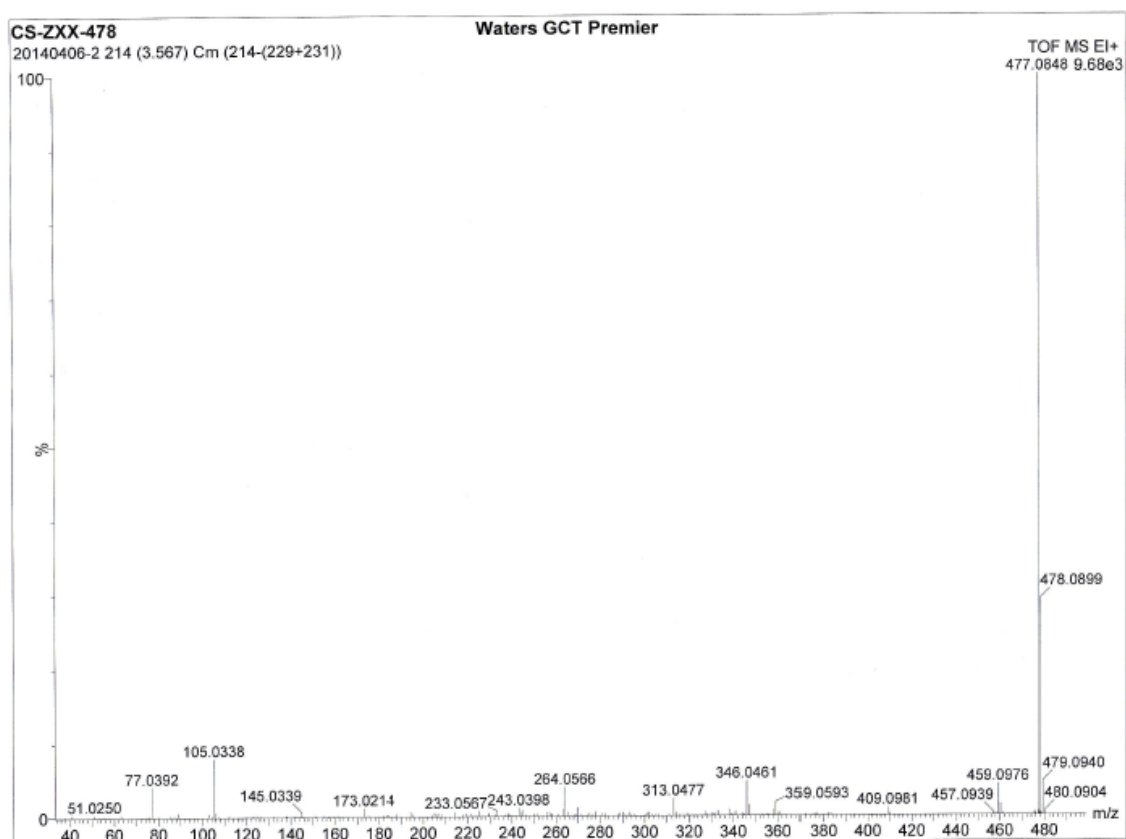

### <sup>1</sup>H NMR Spectrum of 3fa

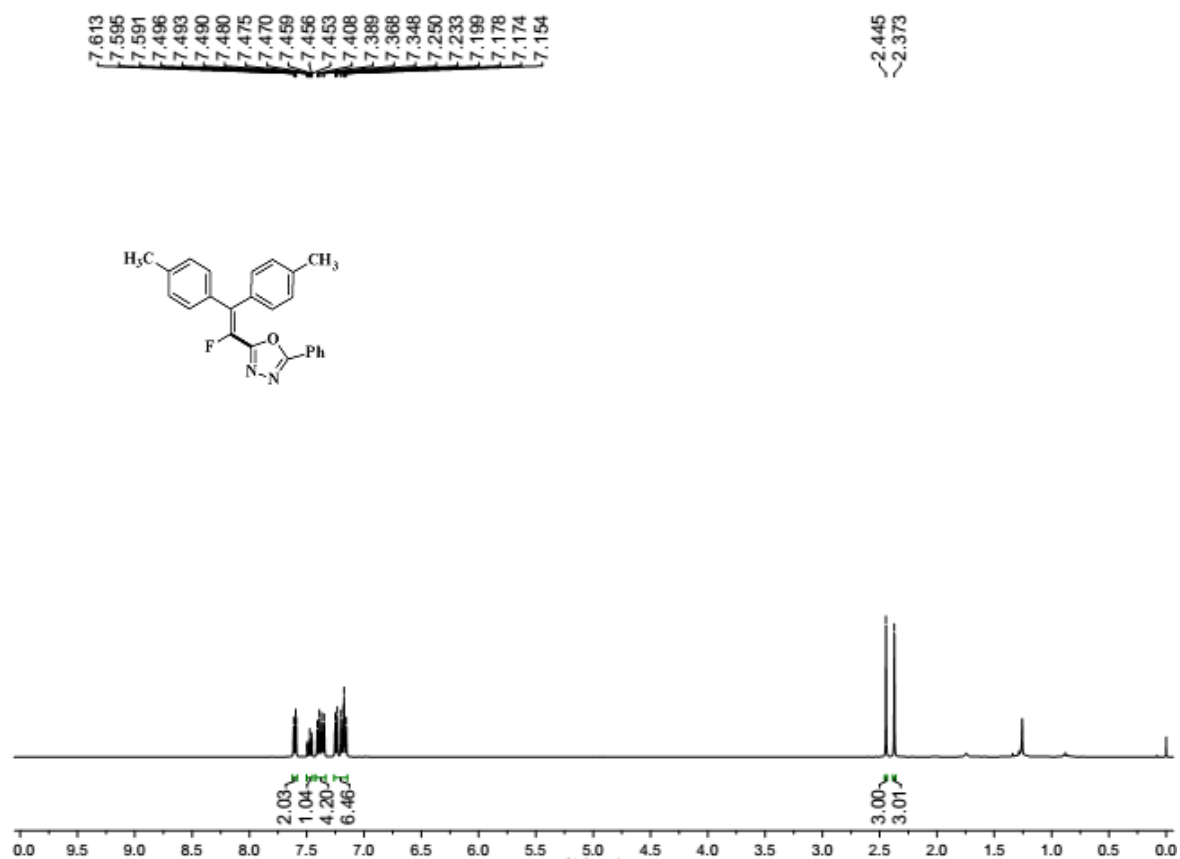

### <sup>19</sup>F NMR Spectrum of 3fa

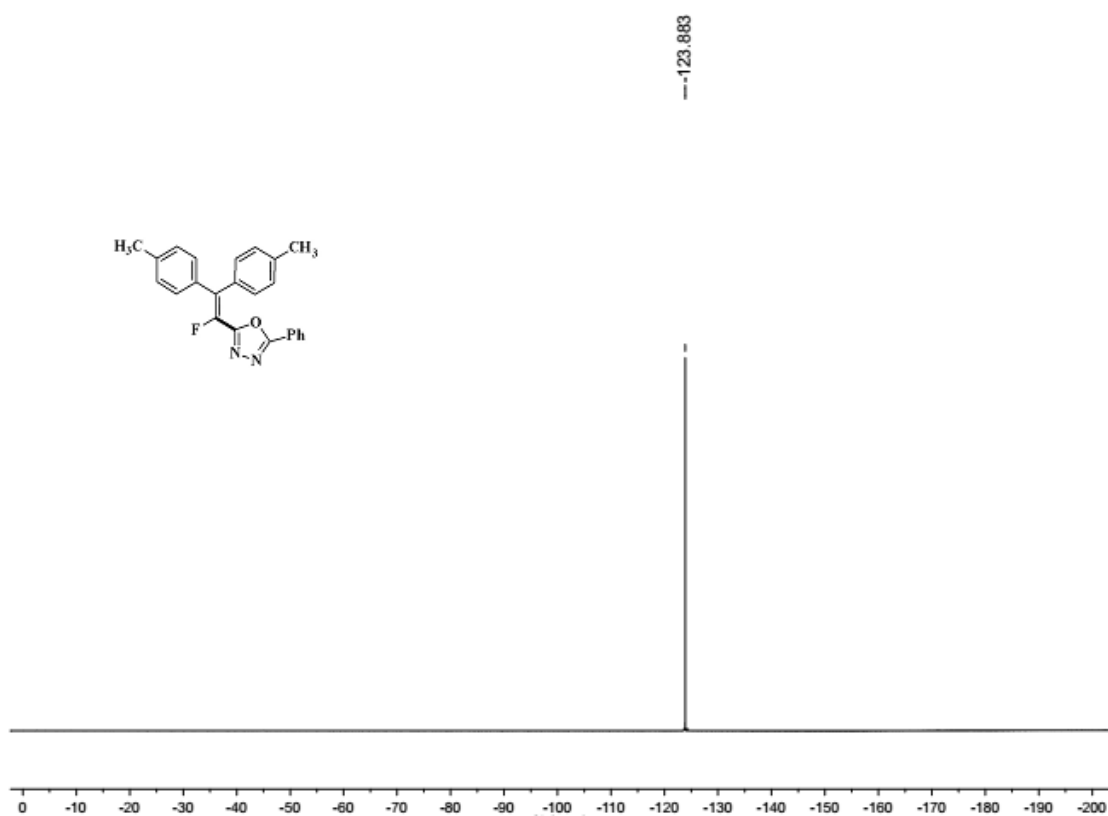

# <sup>13</sup>C NMR Spectrum of 3fa

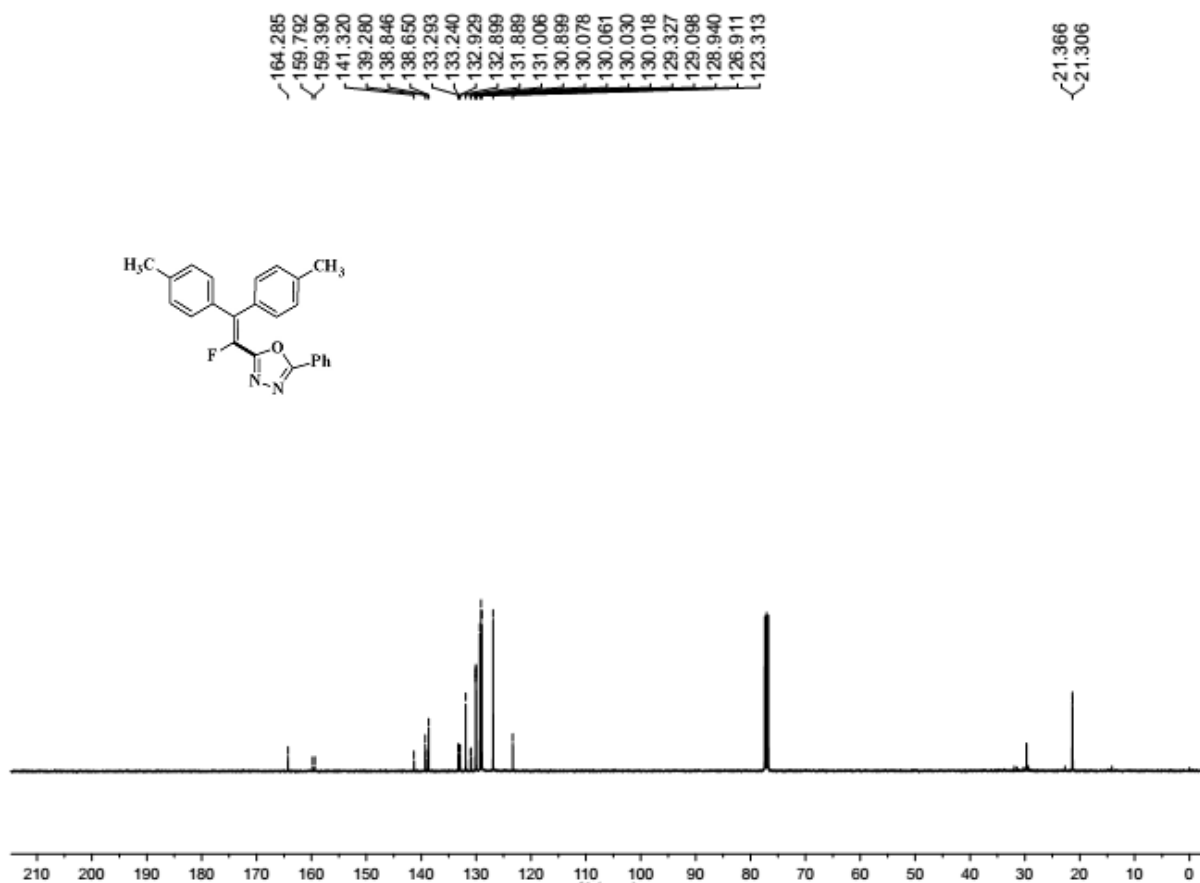

## HRMS (EI) of 3fa

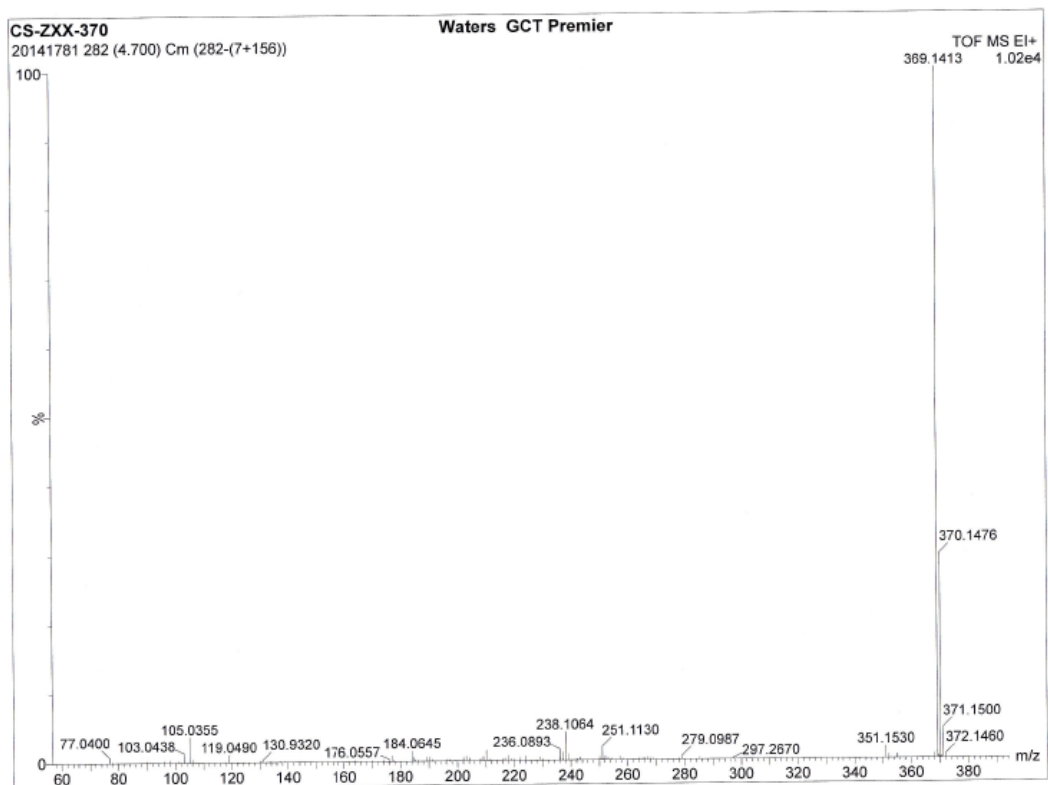

# <sup>1</sup>H NMR Spectrum of 3ga

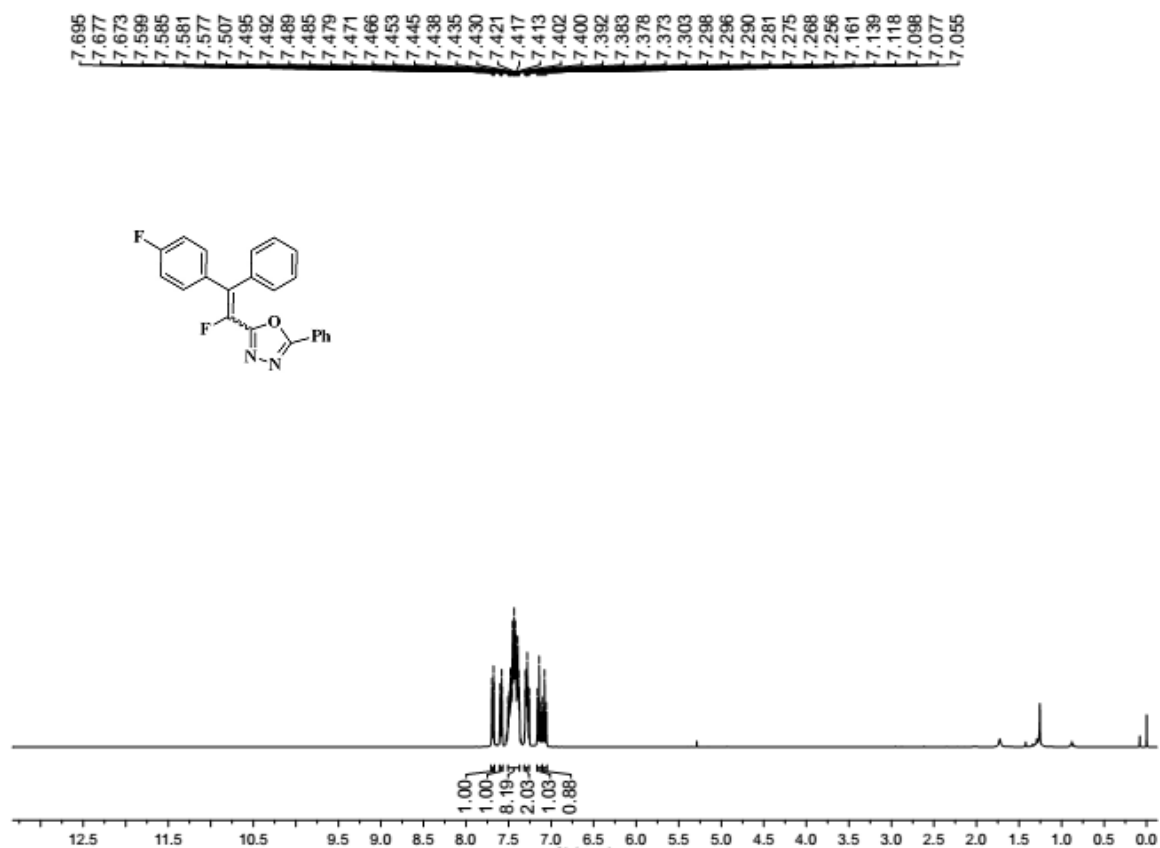

# <sup>19</sup>F NMR Spectrum of 3ga

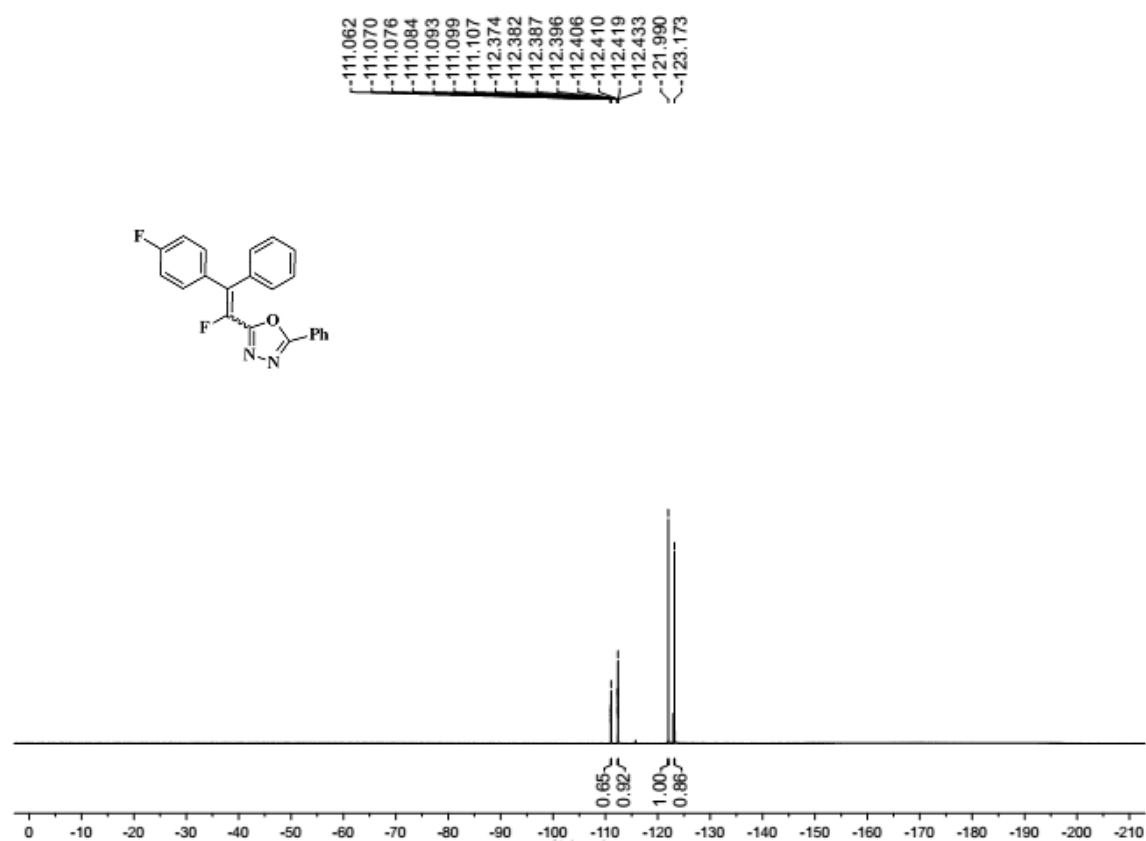

# <sup>13</sup>C NMR Spectrum of 3ga

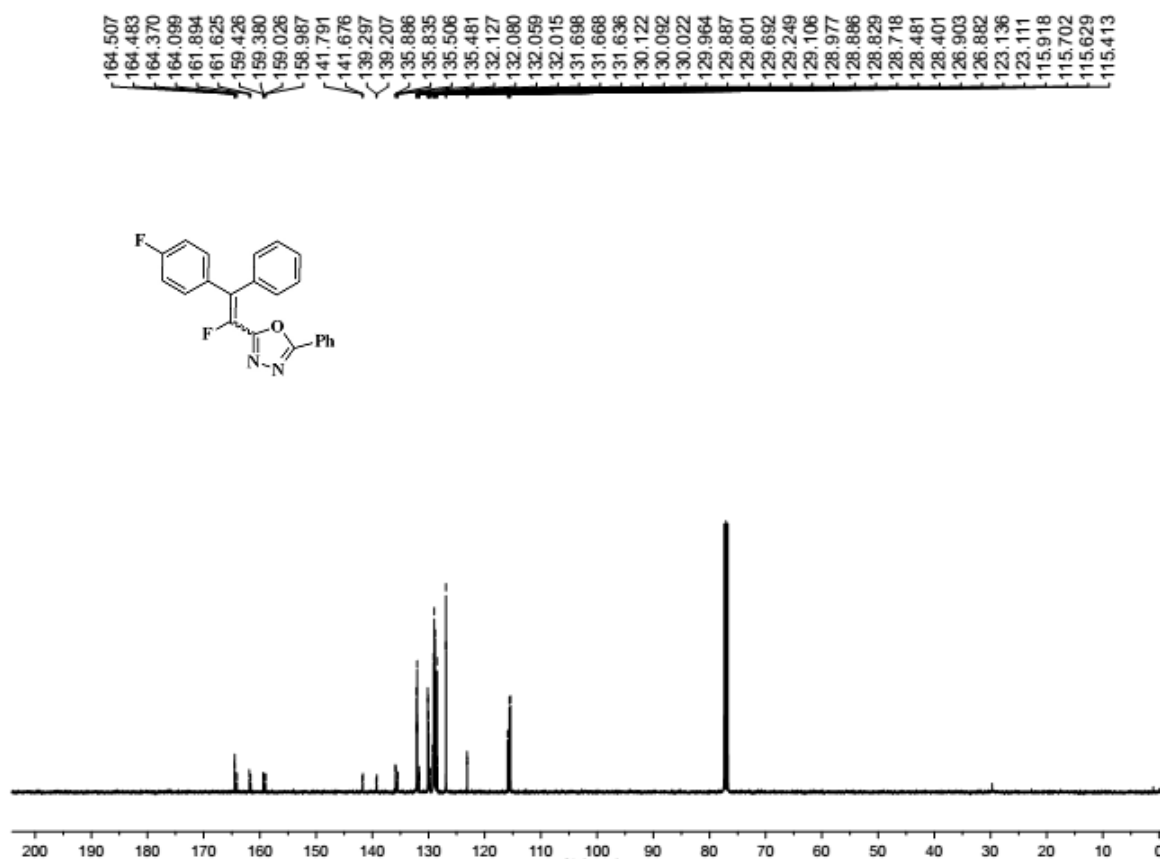

## HRMS (EI) of 3ga

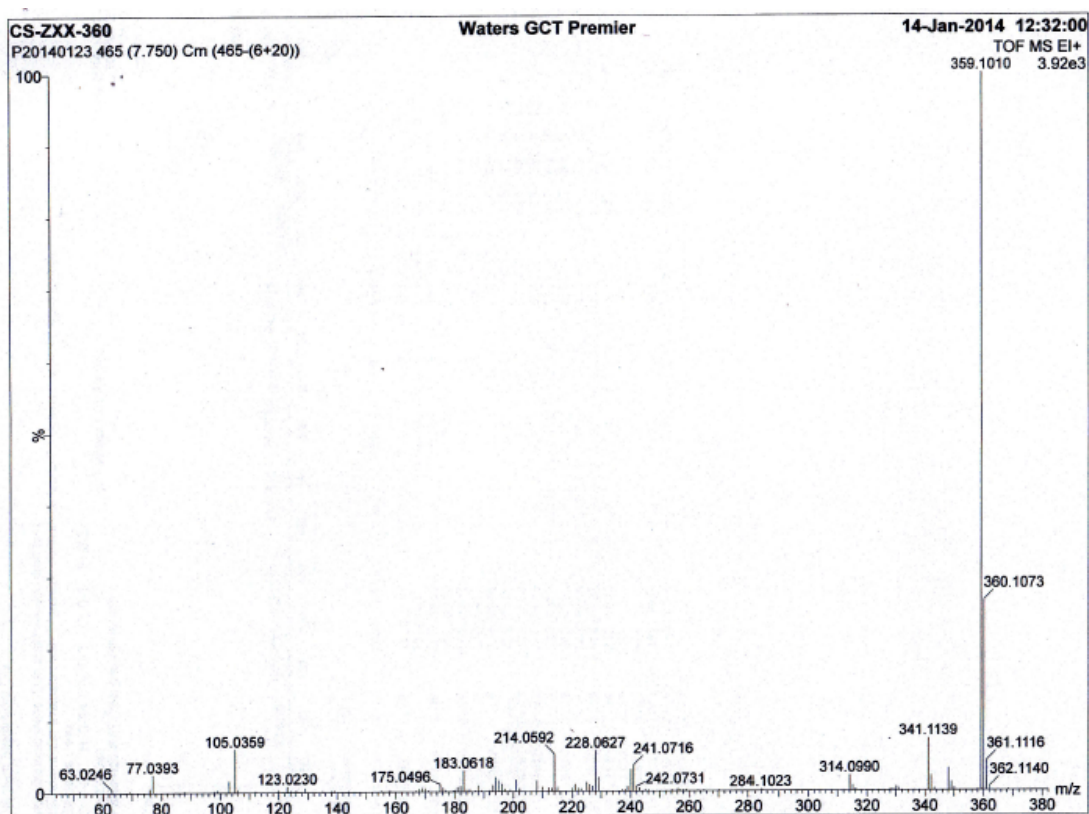

### <sup>1</sup>H NMR Spectrum of 3ab

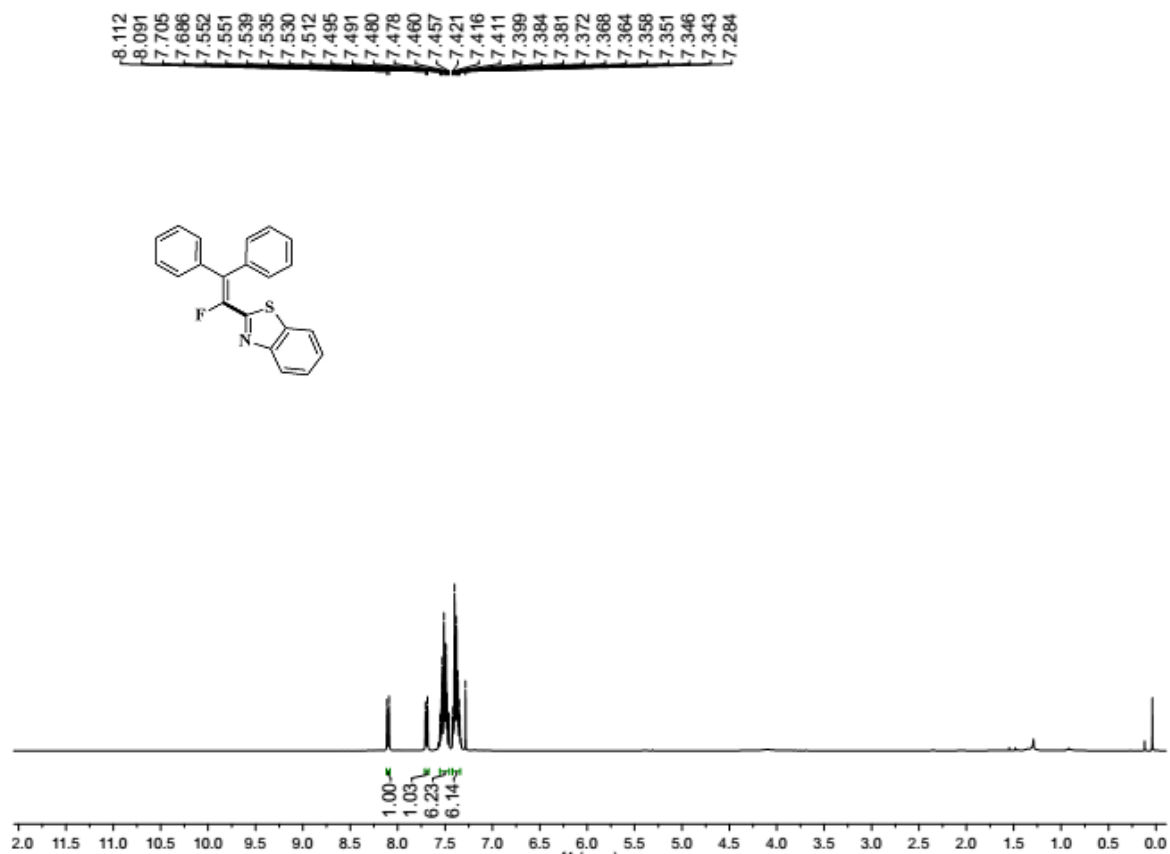

### <sup>19</sup>F NMR Spectrum of 3ab

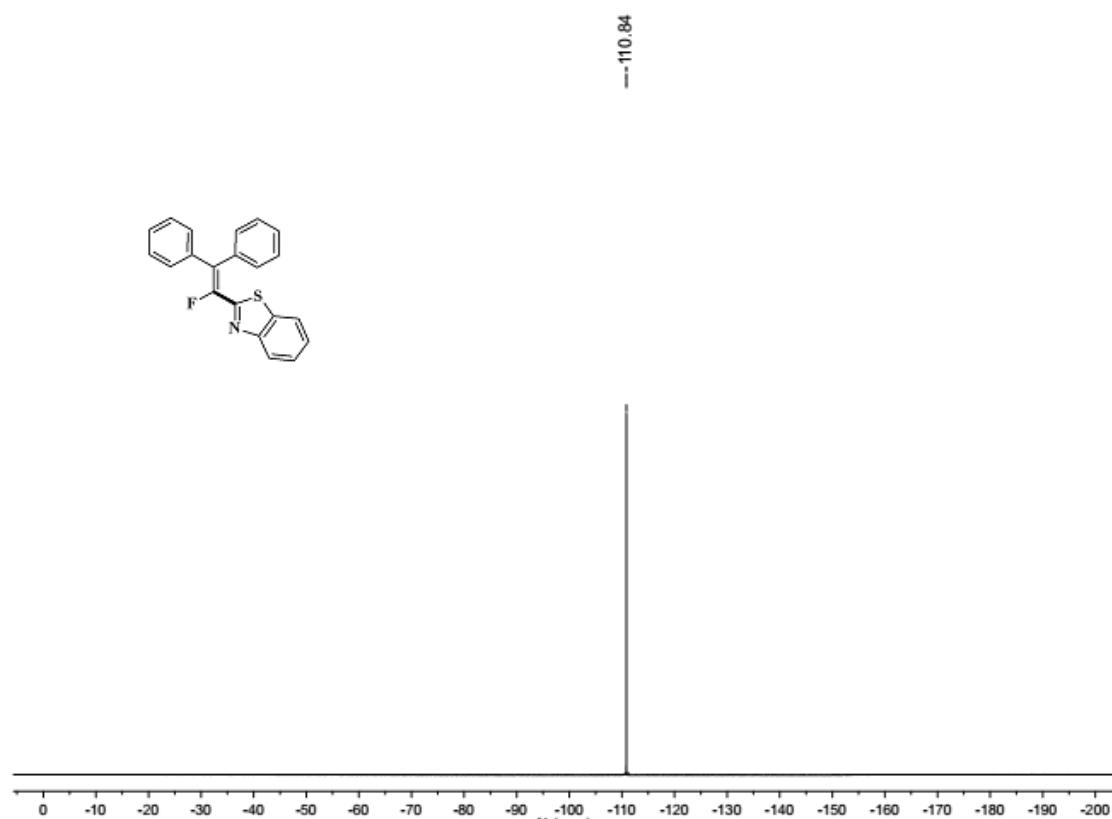

# <sup>13</sup>C NMR Spectrum of 3ab

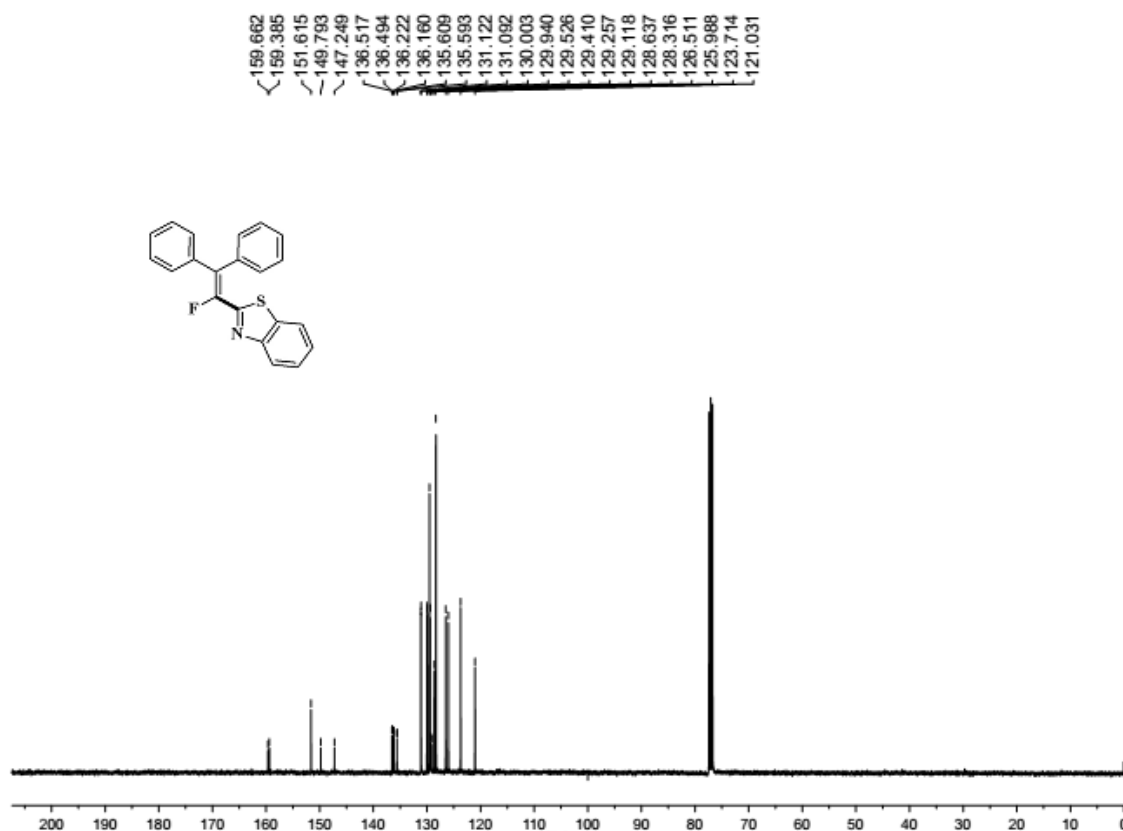

## HRMS (EI) of 3ab

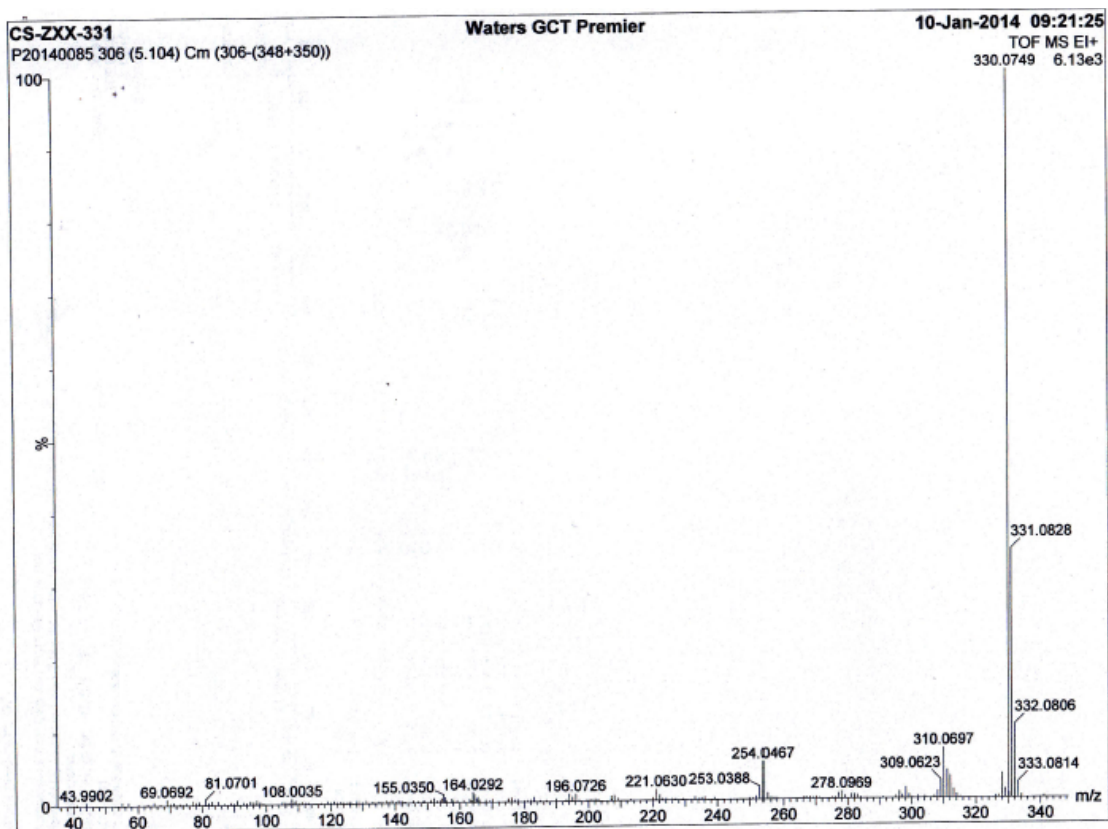

### <sup>1</sup>H NMR Spectrum of 3bb

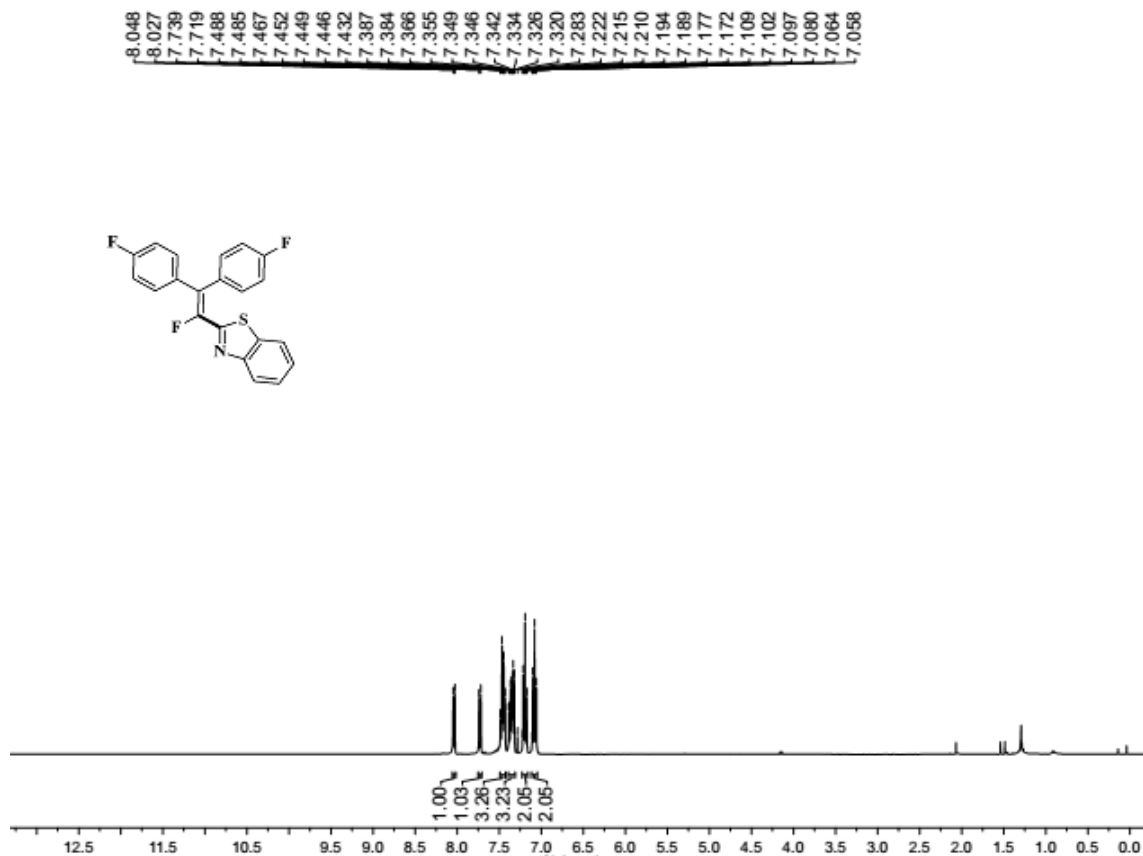

### <sup>19</sup>F NMR Spectrum of 3bb

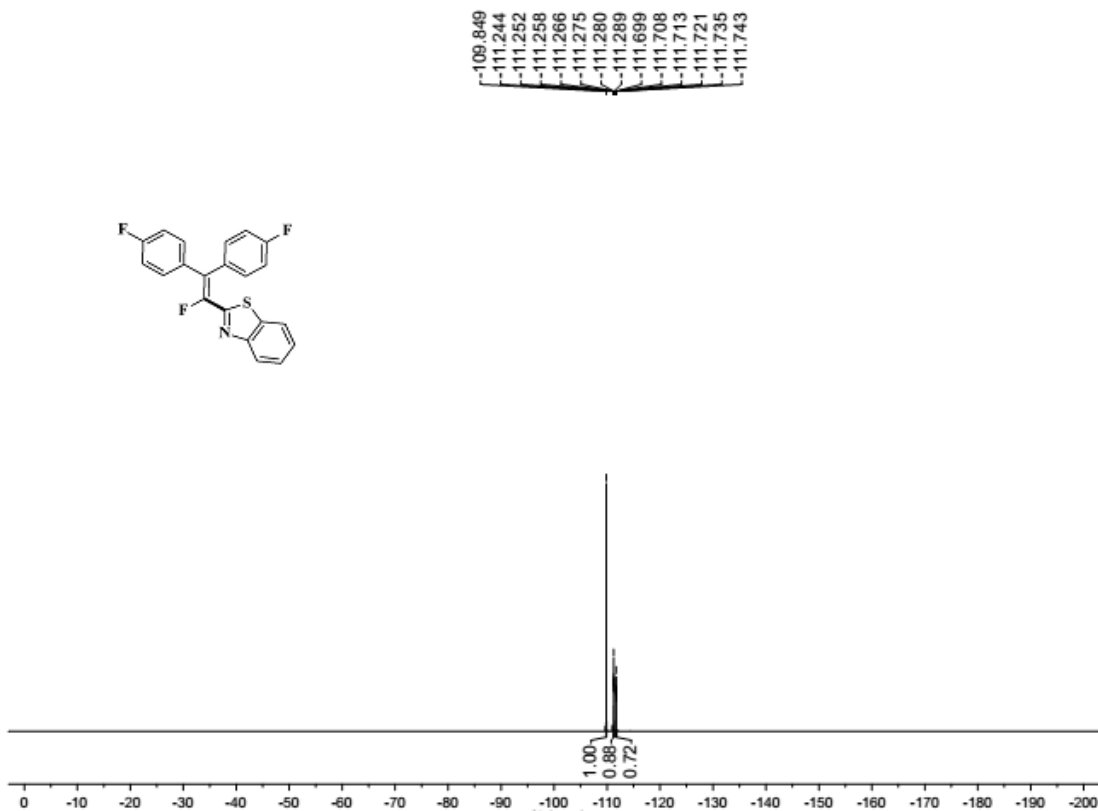

# <sup>13</sup>C NMR Spectrum of 3bb

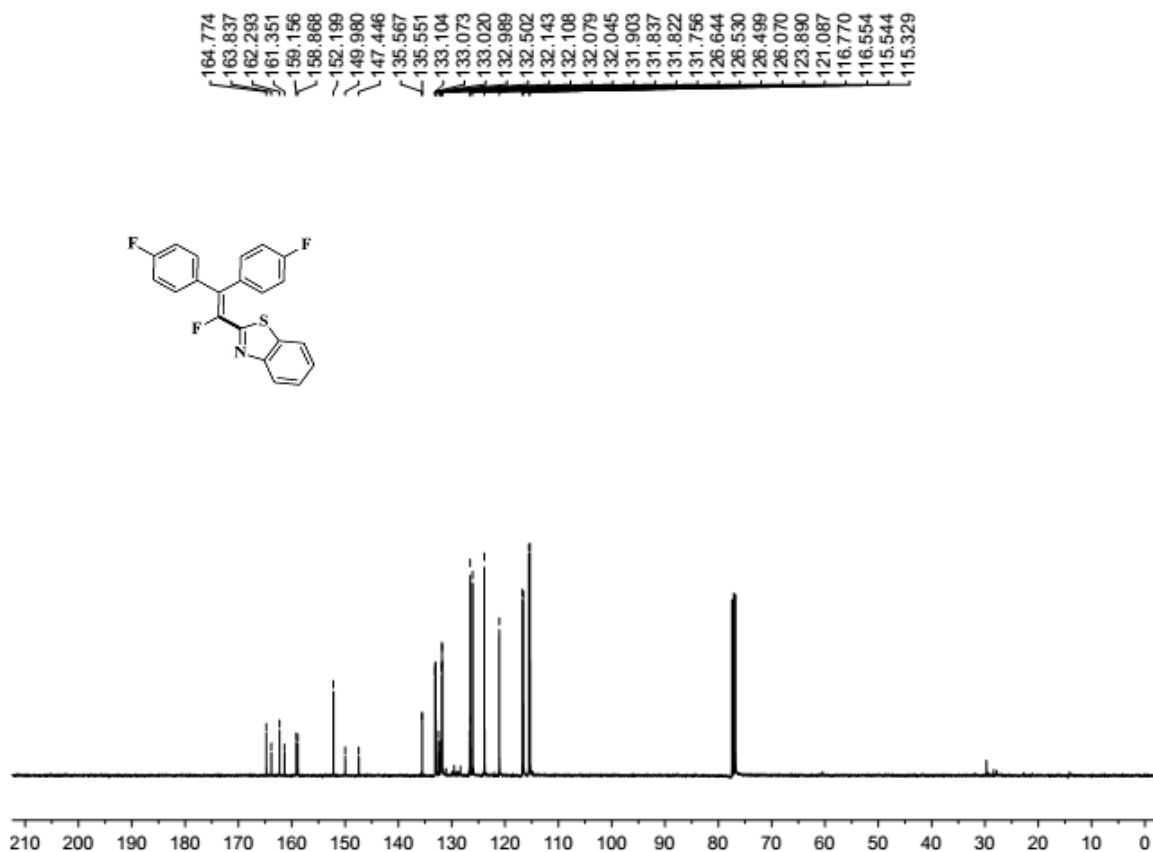

## HRMS (EI) of 3bb

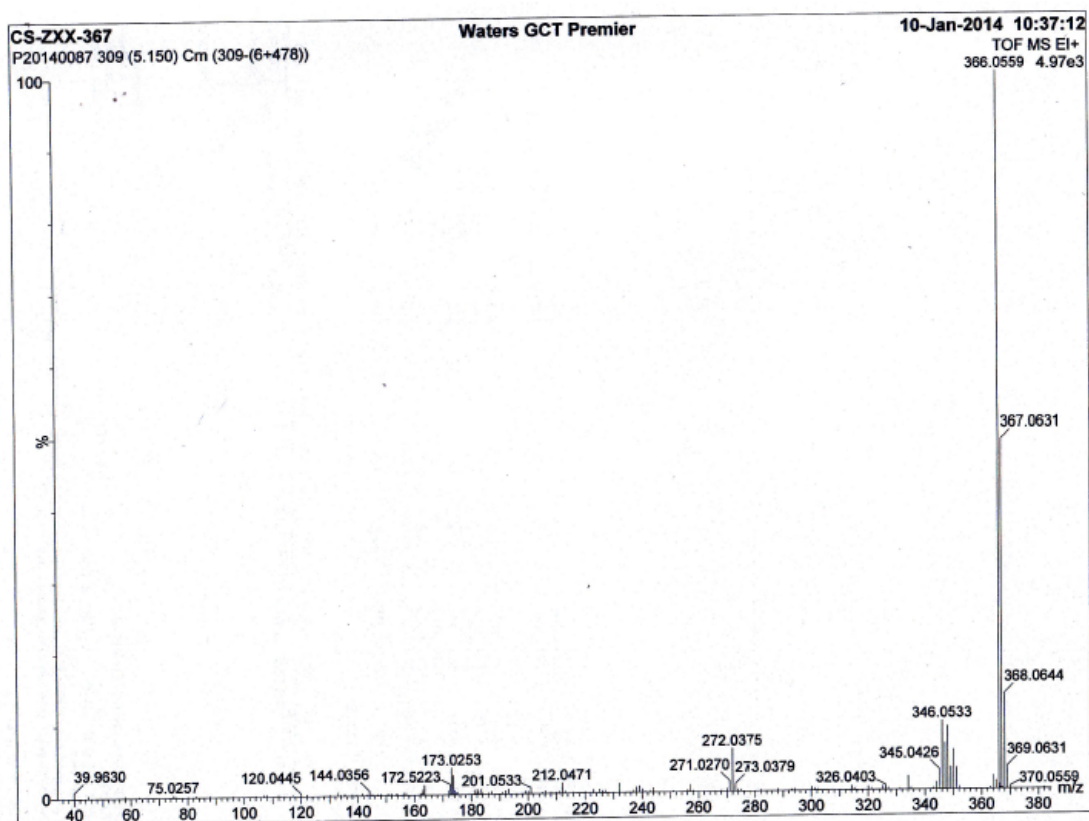

<sup>1</sup>H NMR Spectrum of 3db

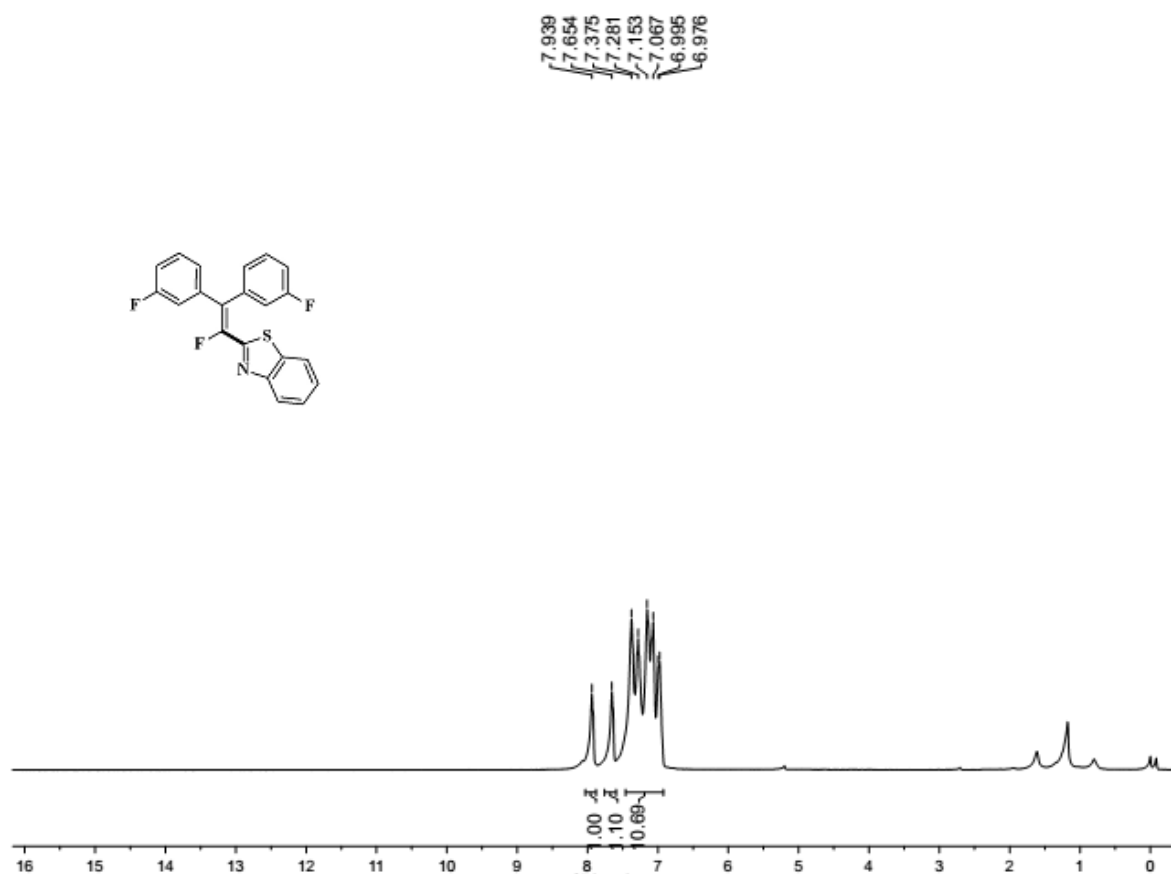

<sup>19</sup>F NMR Spectrum of 3db

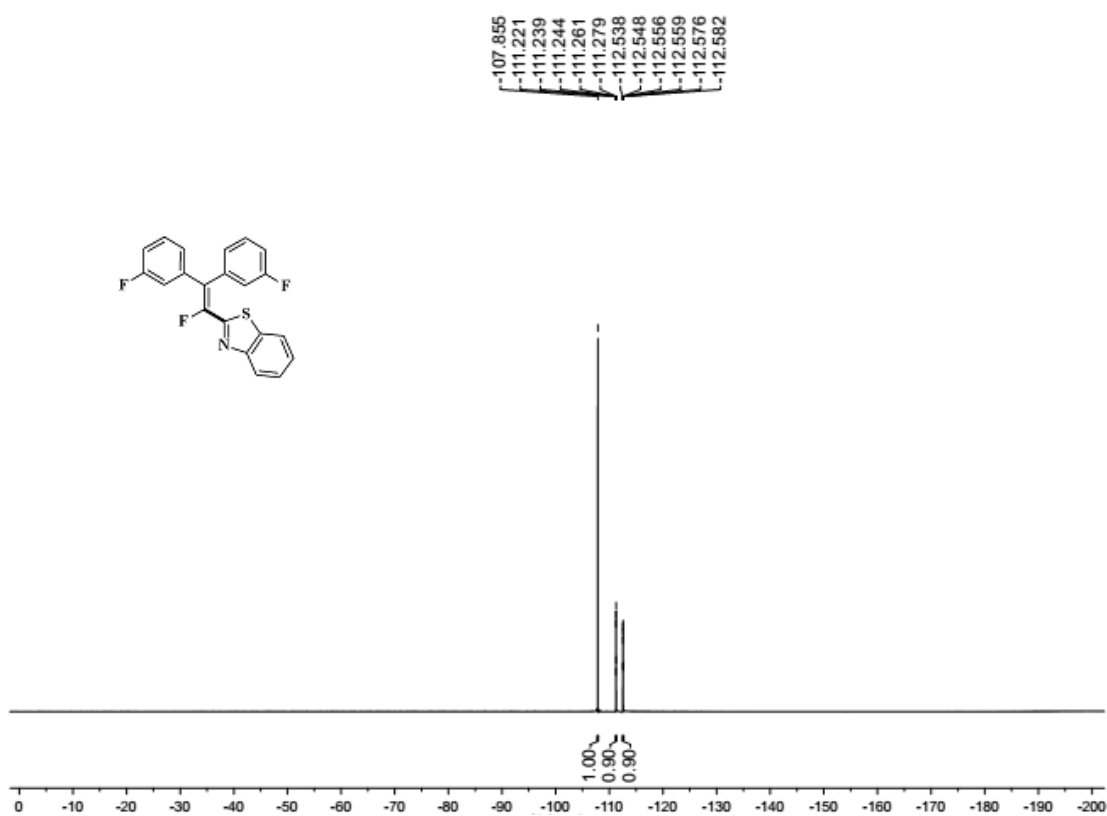

# <sup>13</sup>C NMR Spectrum of 3db

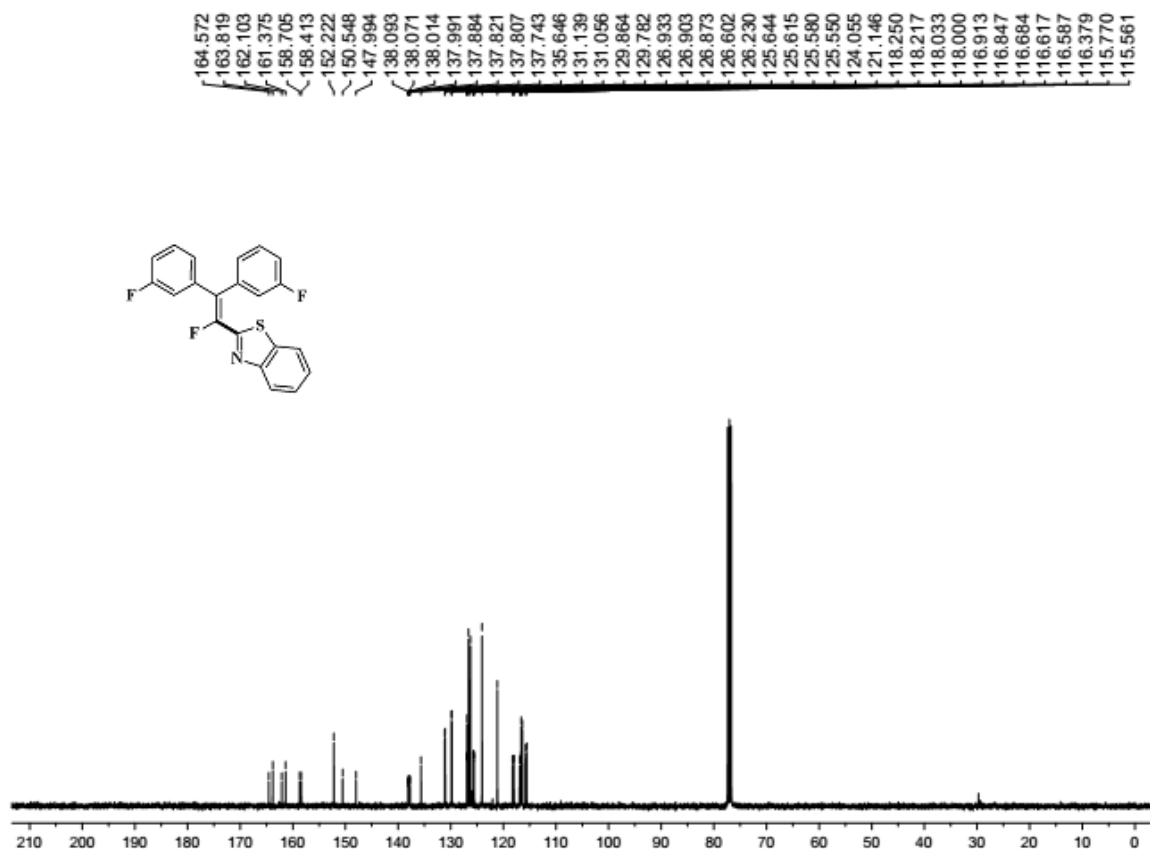

## HRMS (EI) of 3db

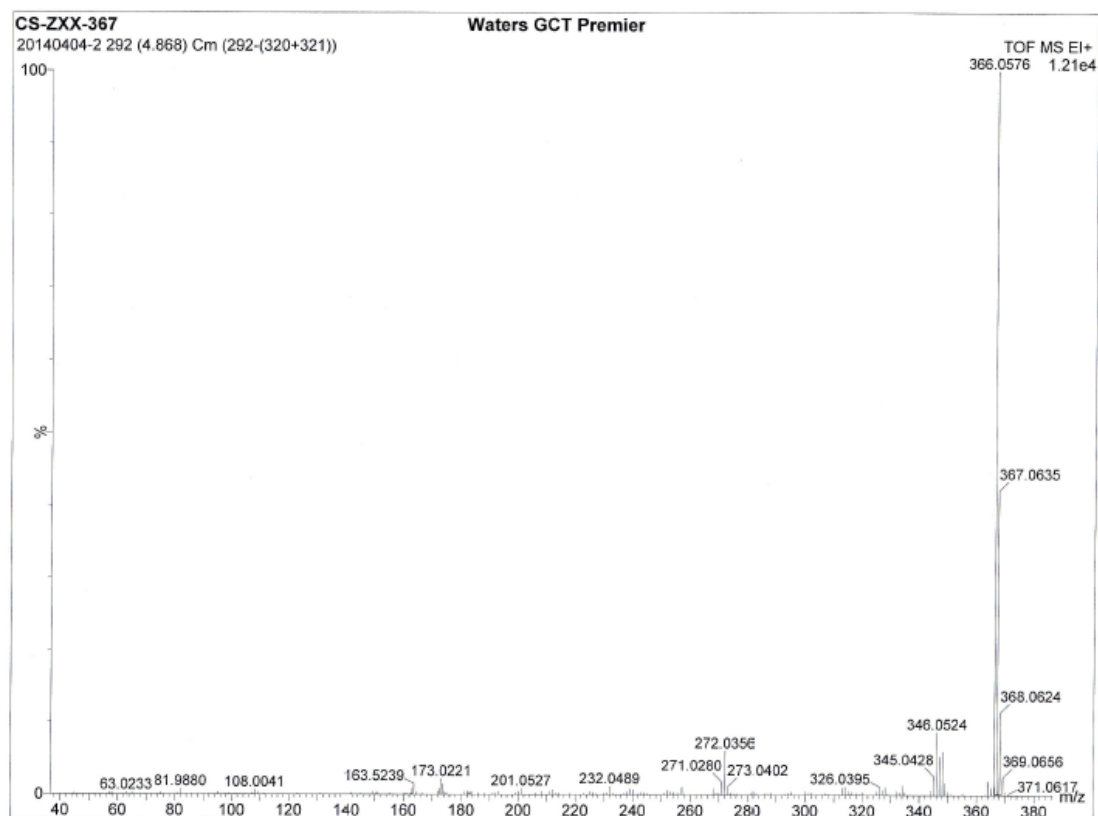

# <sup>1</sup>H NMR Spectrum of 3fb

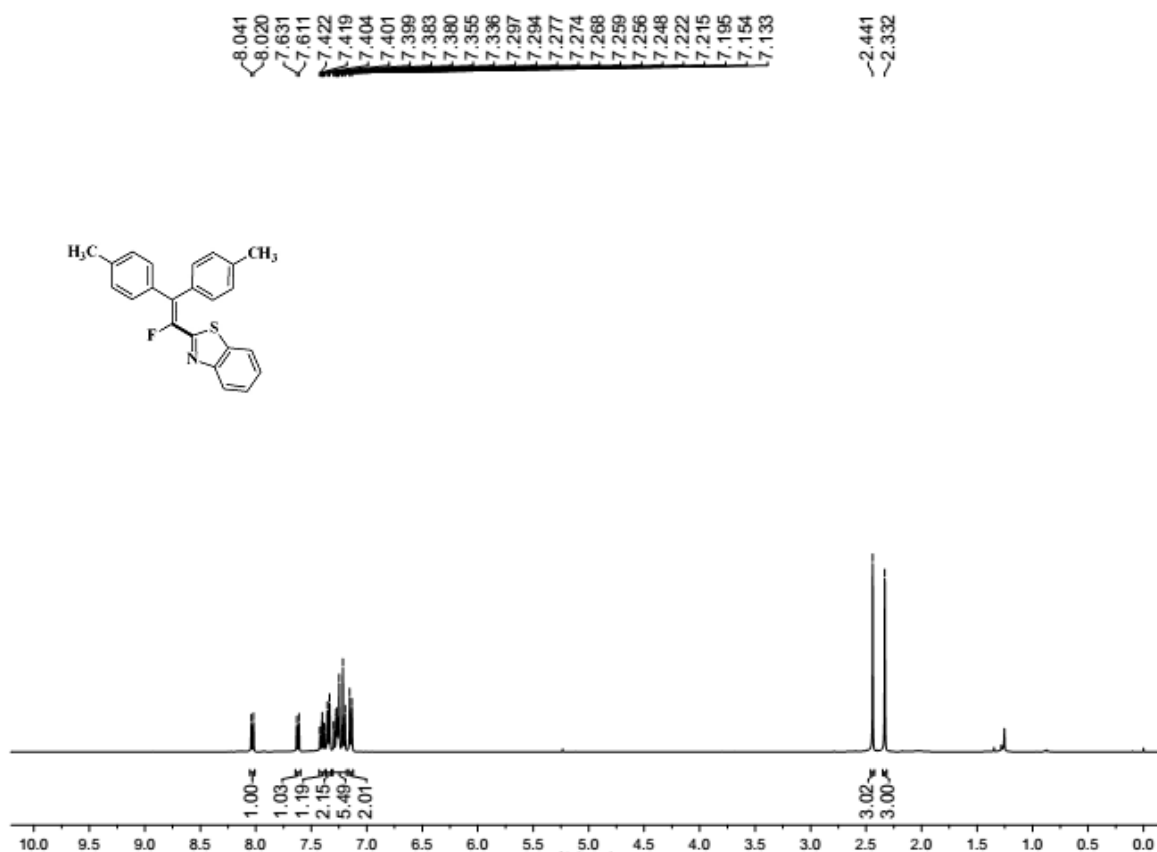

# <sup>19</sup>F NMR Spectrum of 3fb

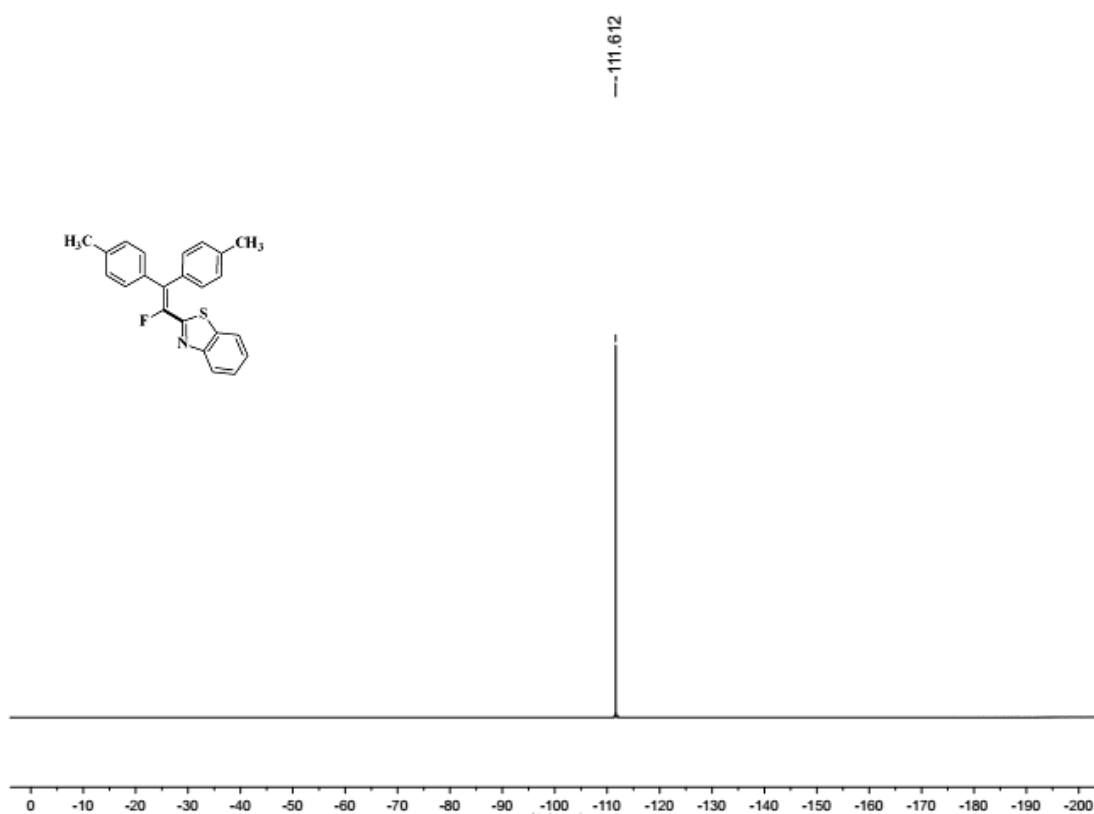

# <sup>13</sup>C NMR Spectrum of 3fb

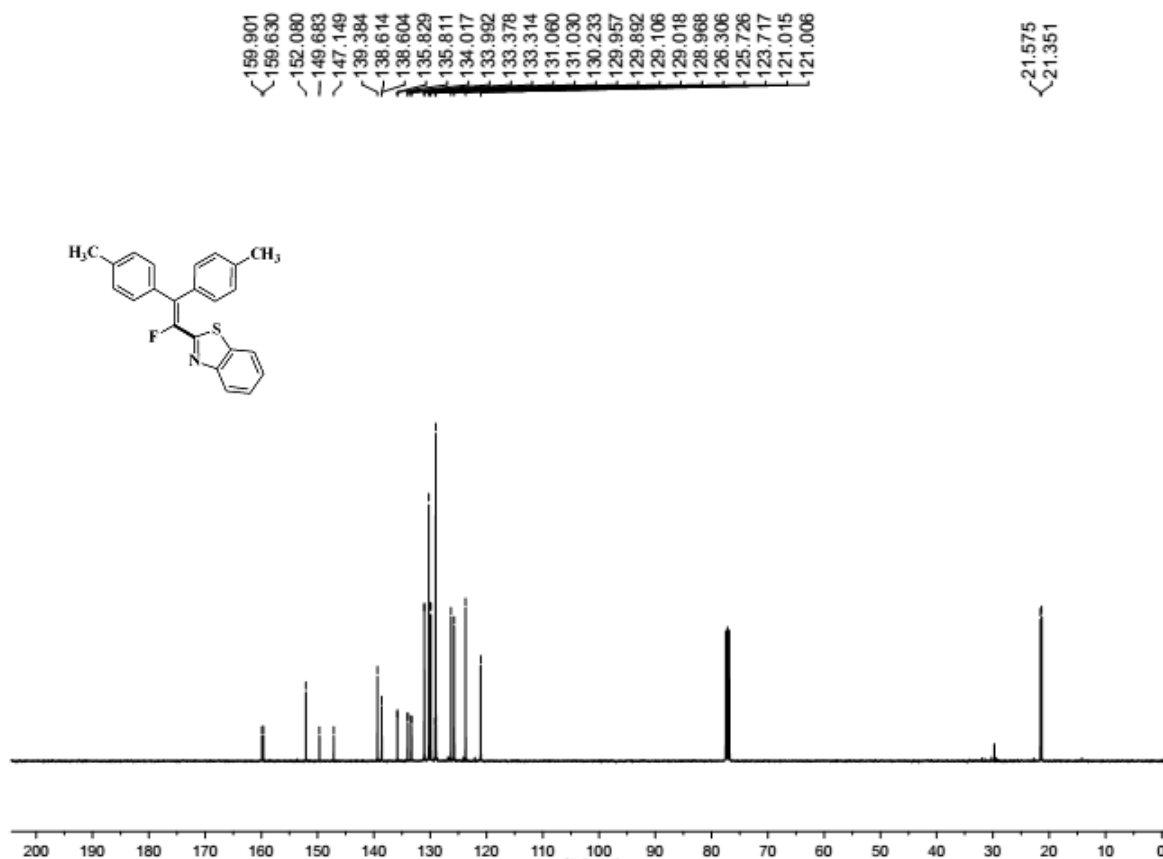

## HRMS (EI) of 3fb

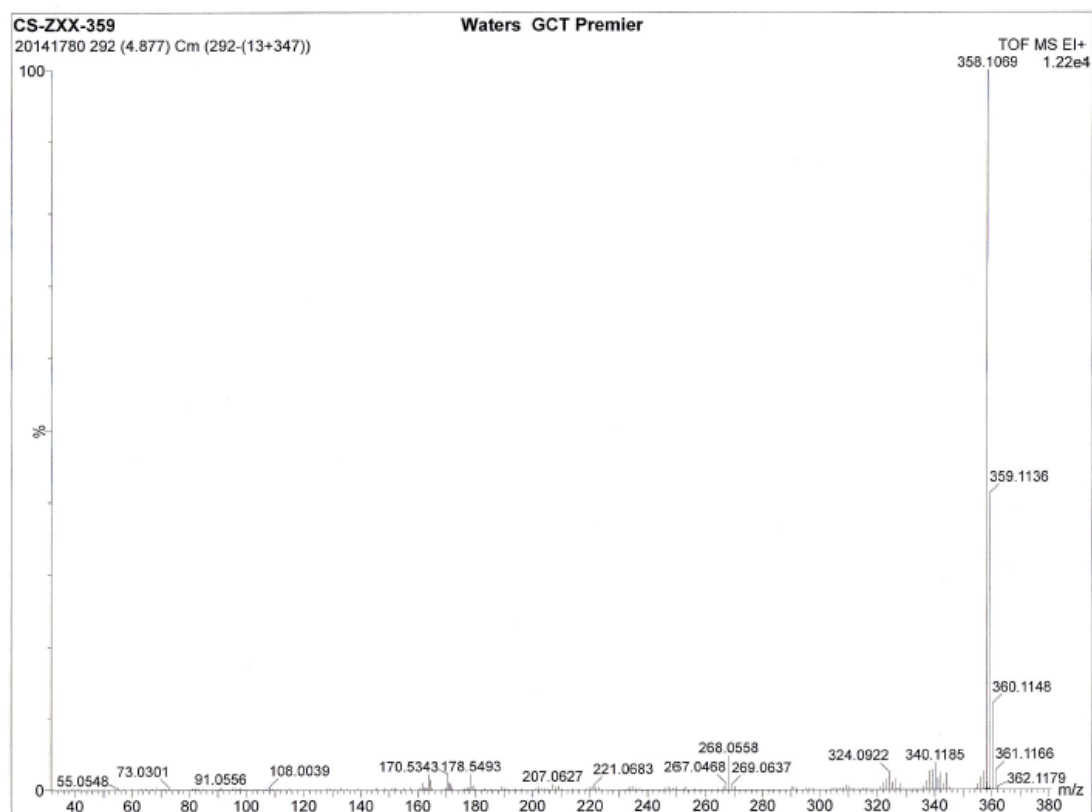

# <sup>1</sup>H NMR Spectrum of 3gb

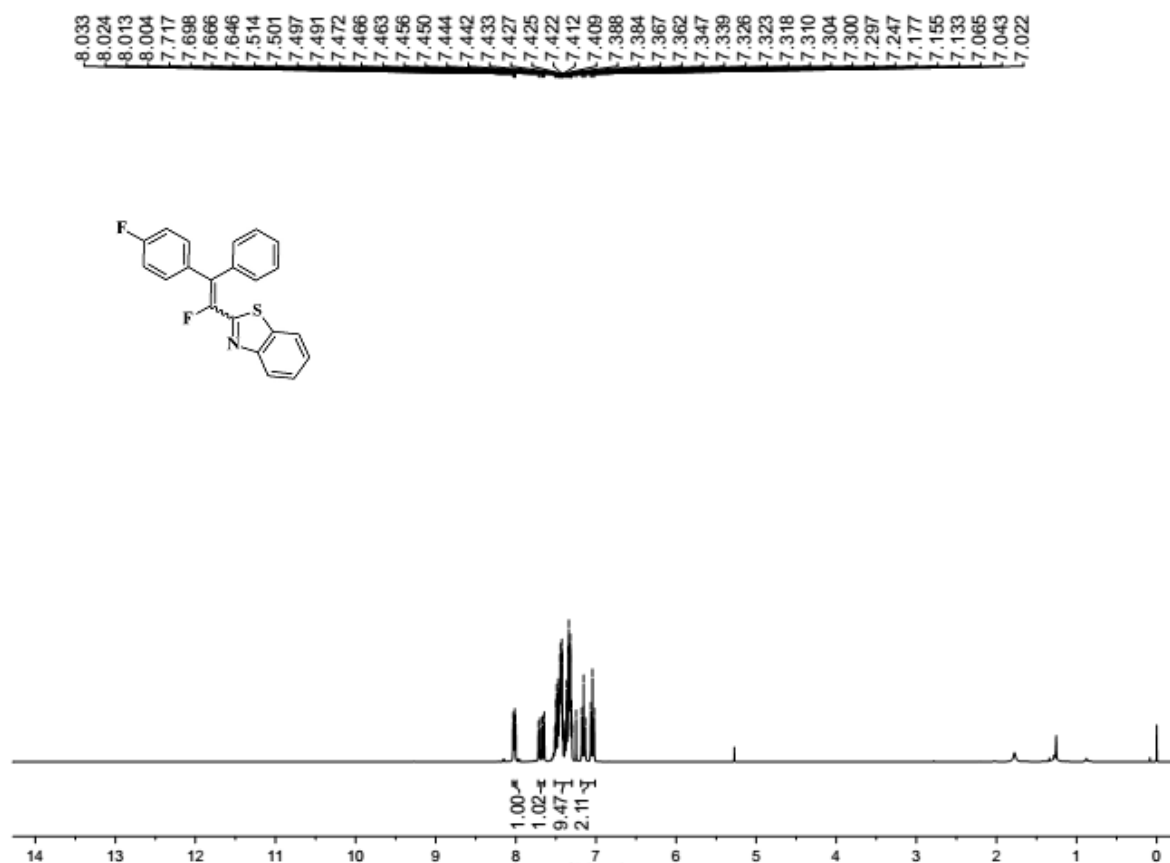

# <sup>19</sup>F NMR Spectrum of 3gb

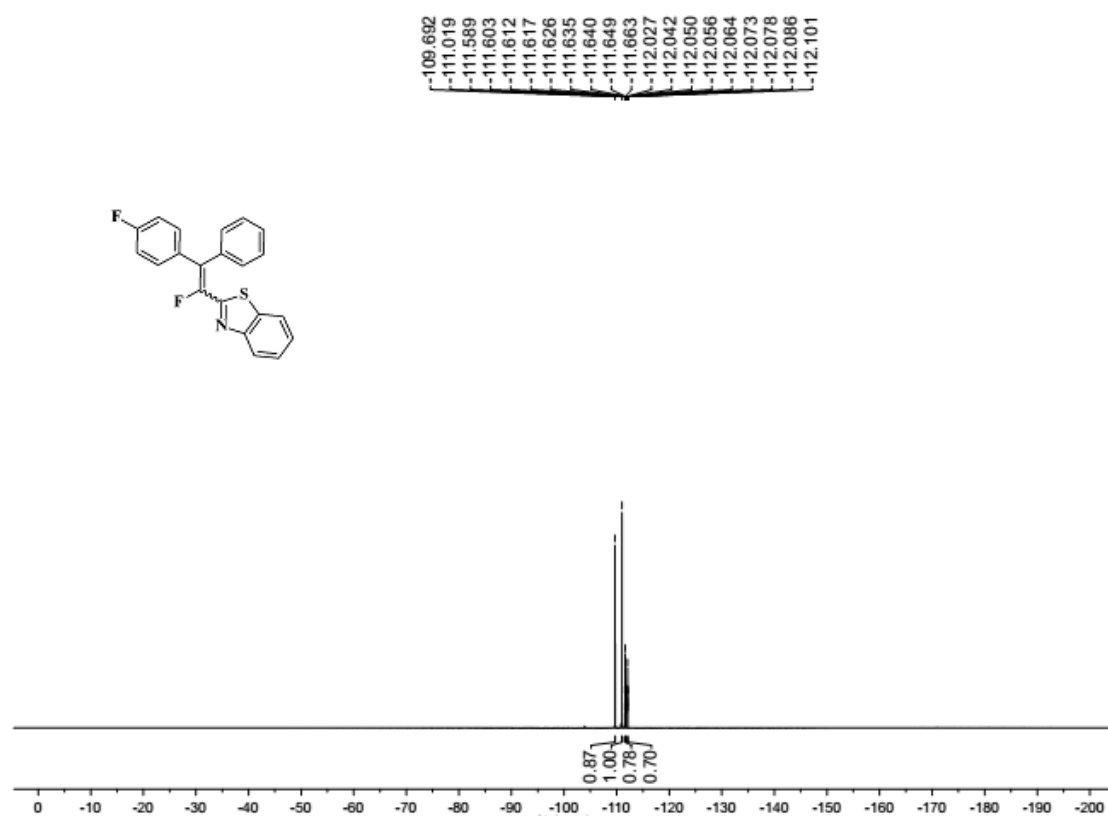

### $^{13}\text{C}$ NMR Spectrum of 3gb

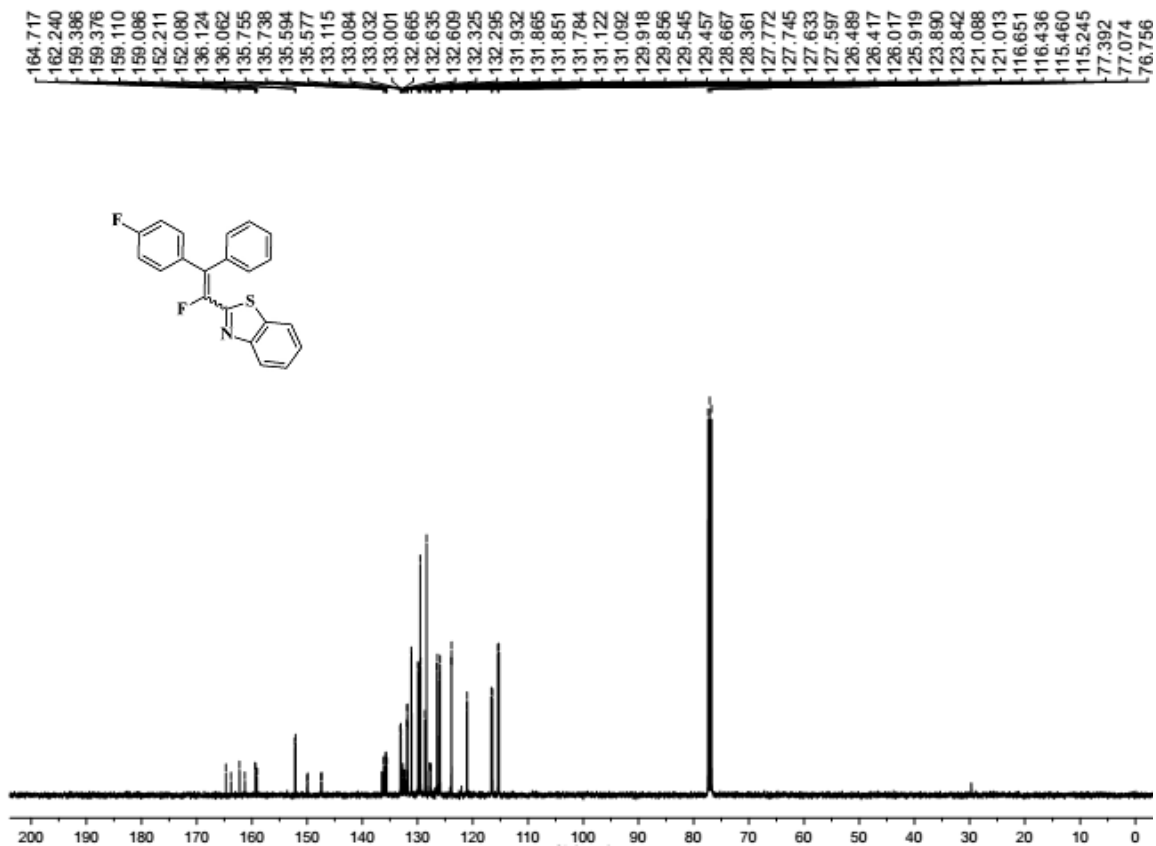

### HRMS (EI) of 3gb

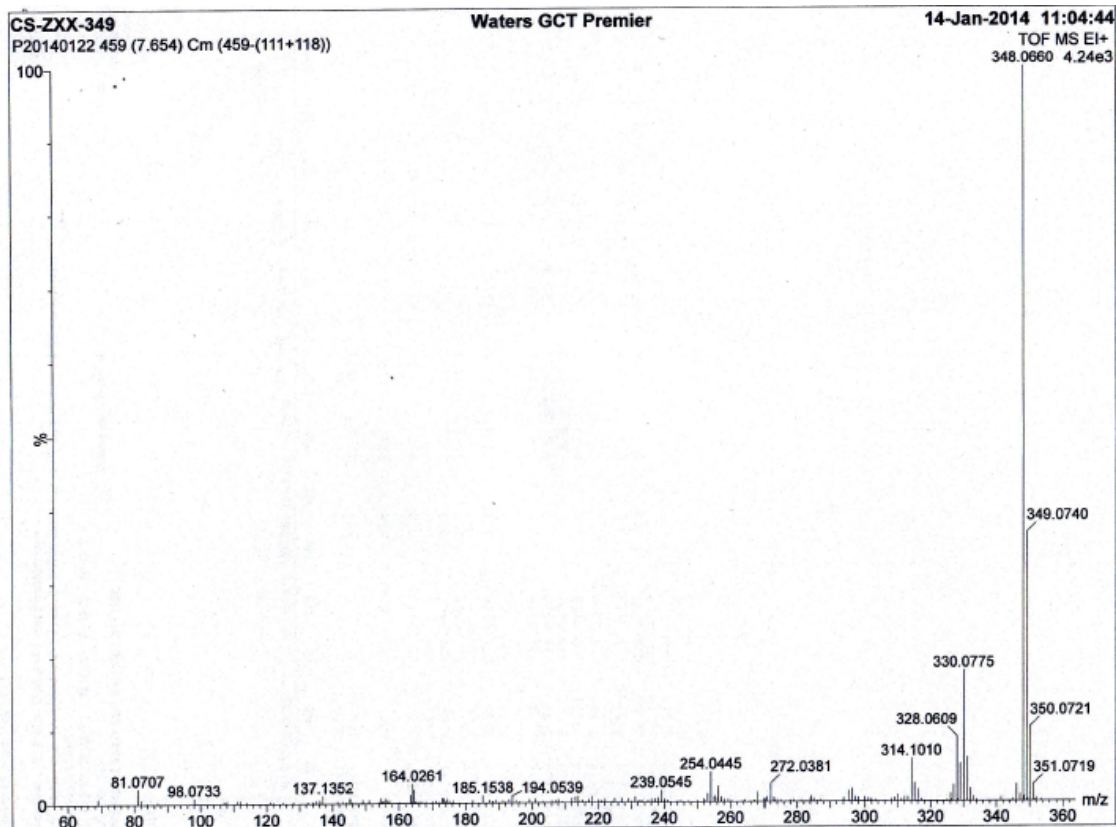

# <sup>1</sup>H NMR Spectrum of 3ac

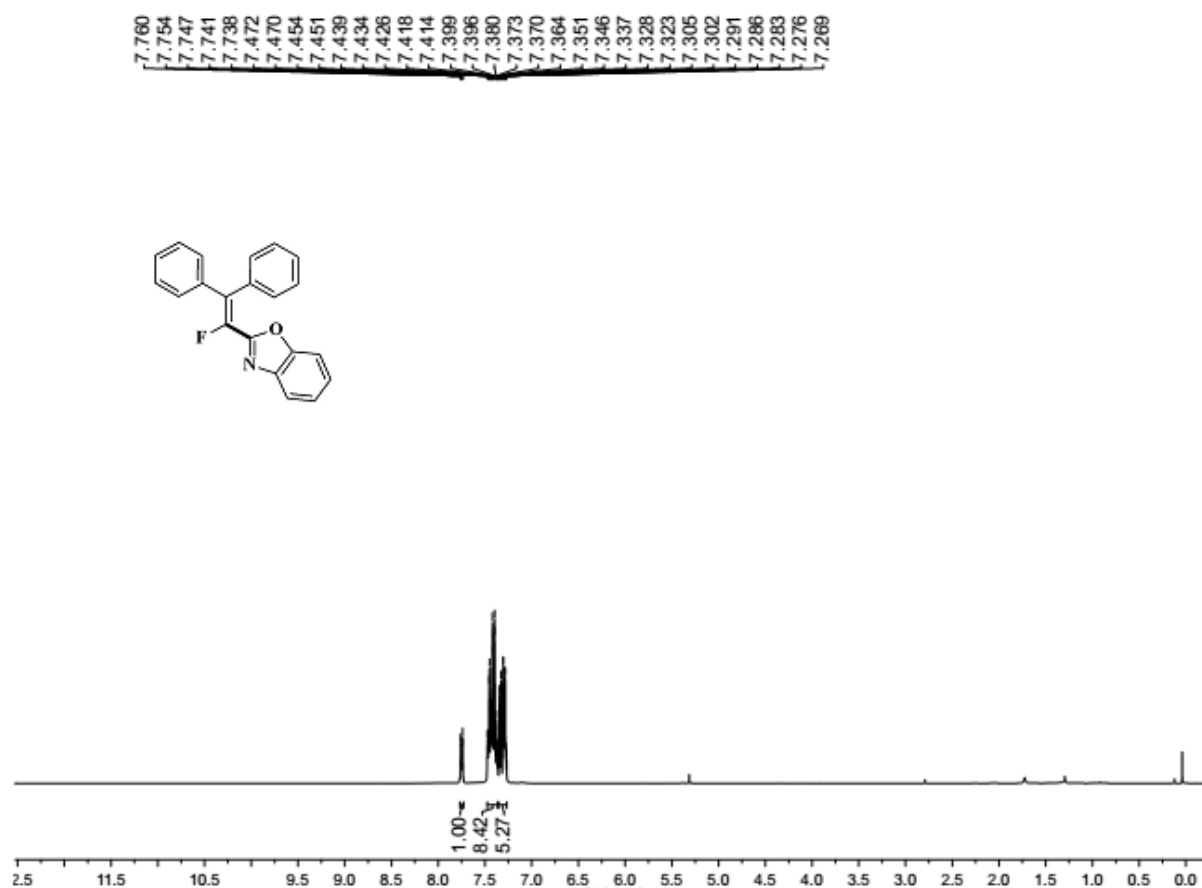

# <sup>19</sup>F NMR Spectrum of 3ac

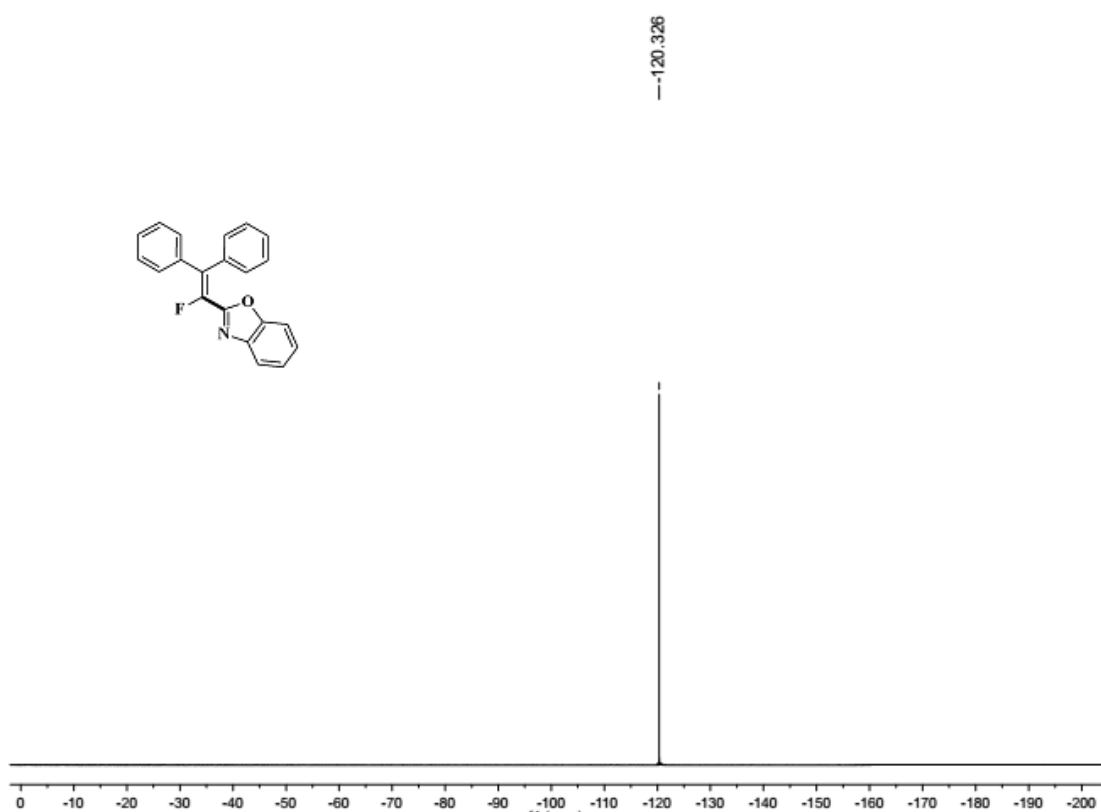

# <sup>13</sup>C NMR Spectrum of 3ac

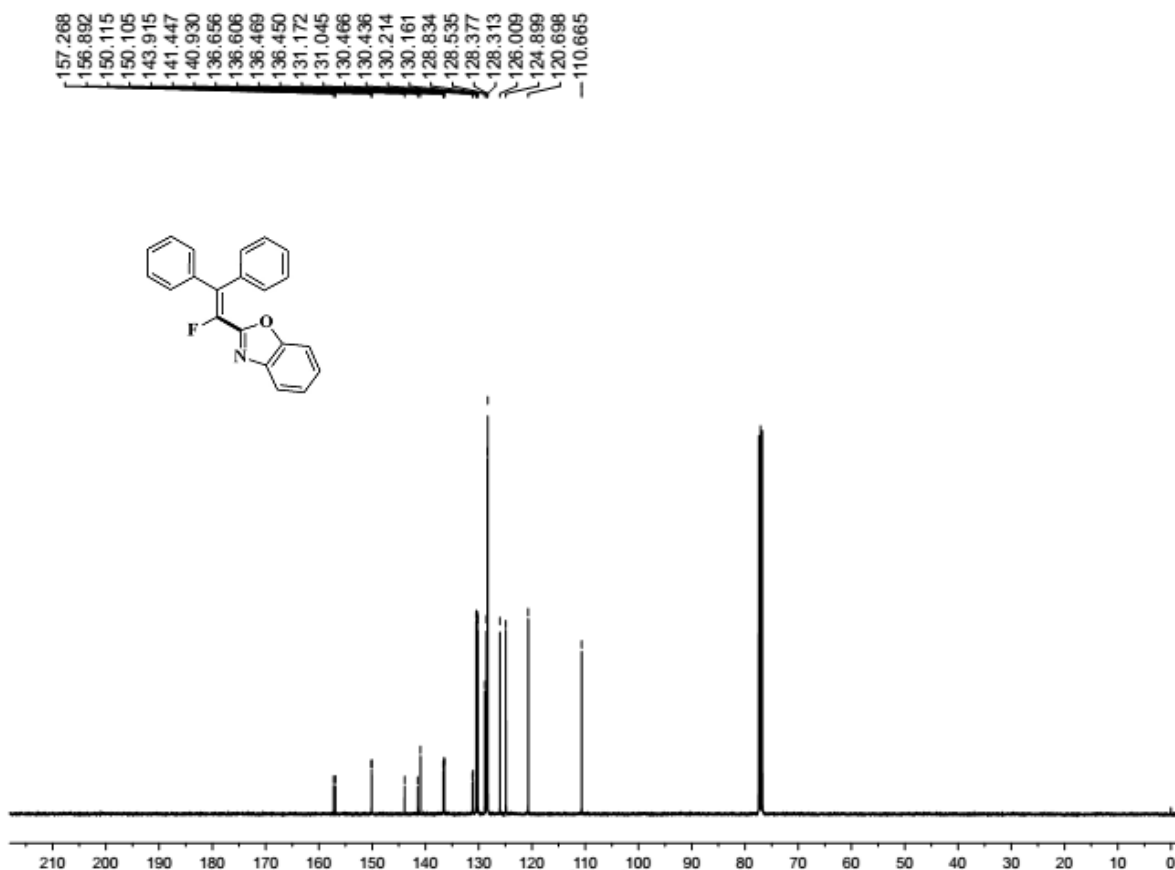

## HRMS (EI) of 3ac

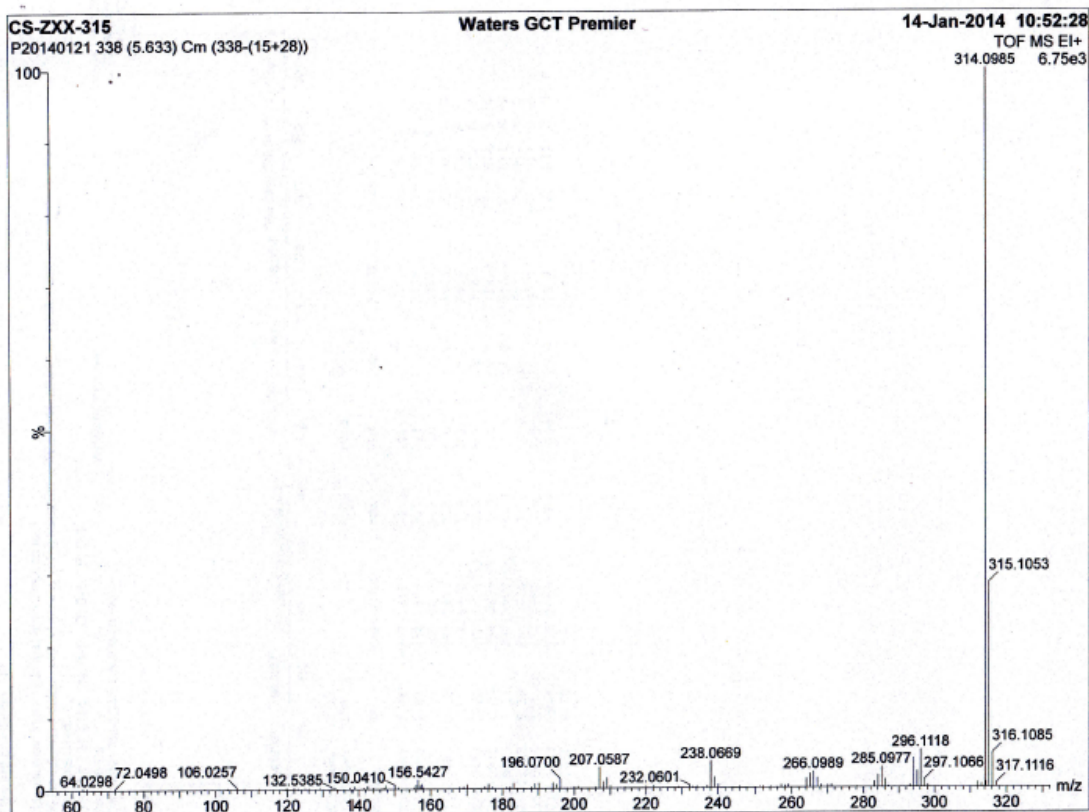

[illegible]

# <sup>13</sup>C NMR Spectrum of 3bc

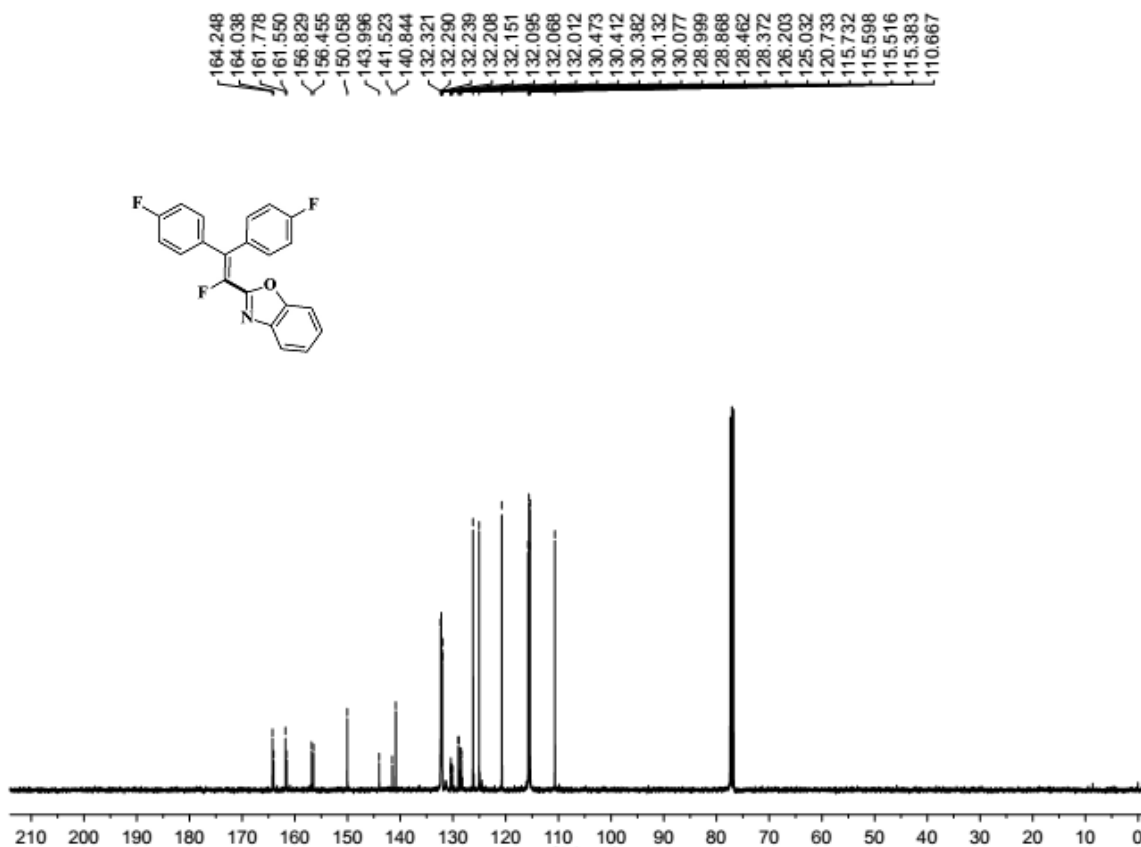

## HRMS (EI) of 3bc

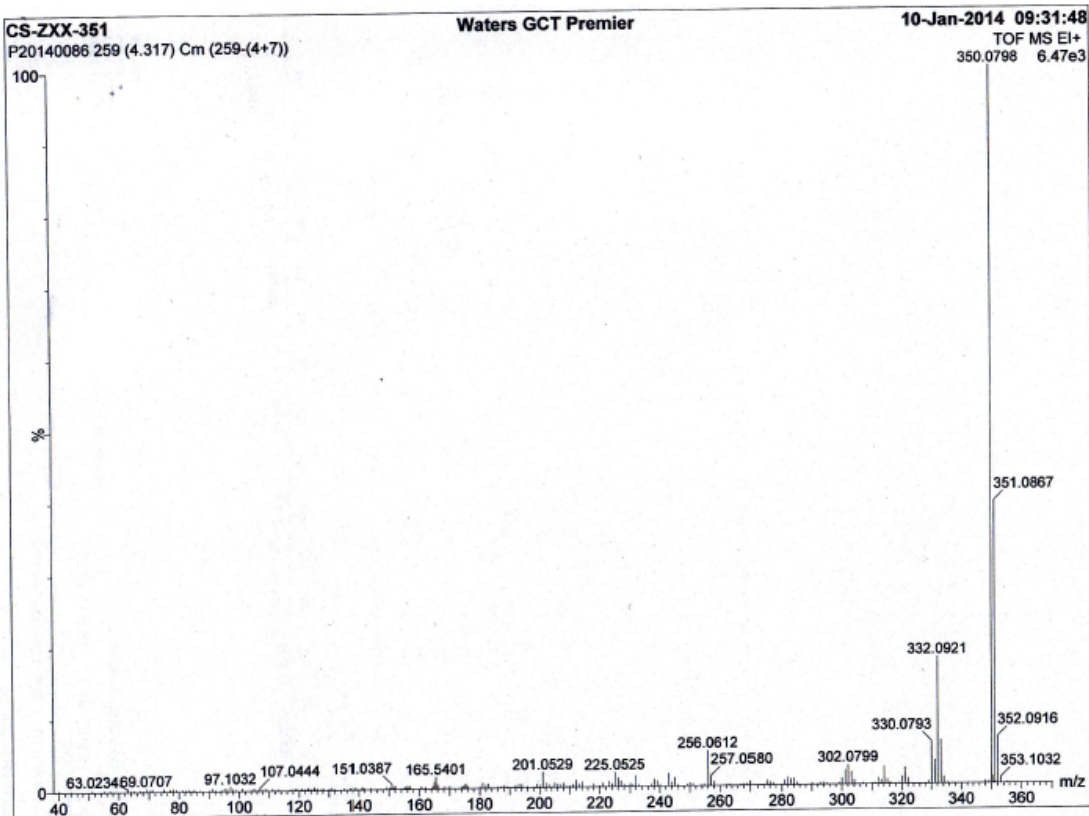

# <sup>1</sup>H NMR Spectrum of 3cc

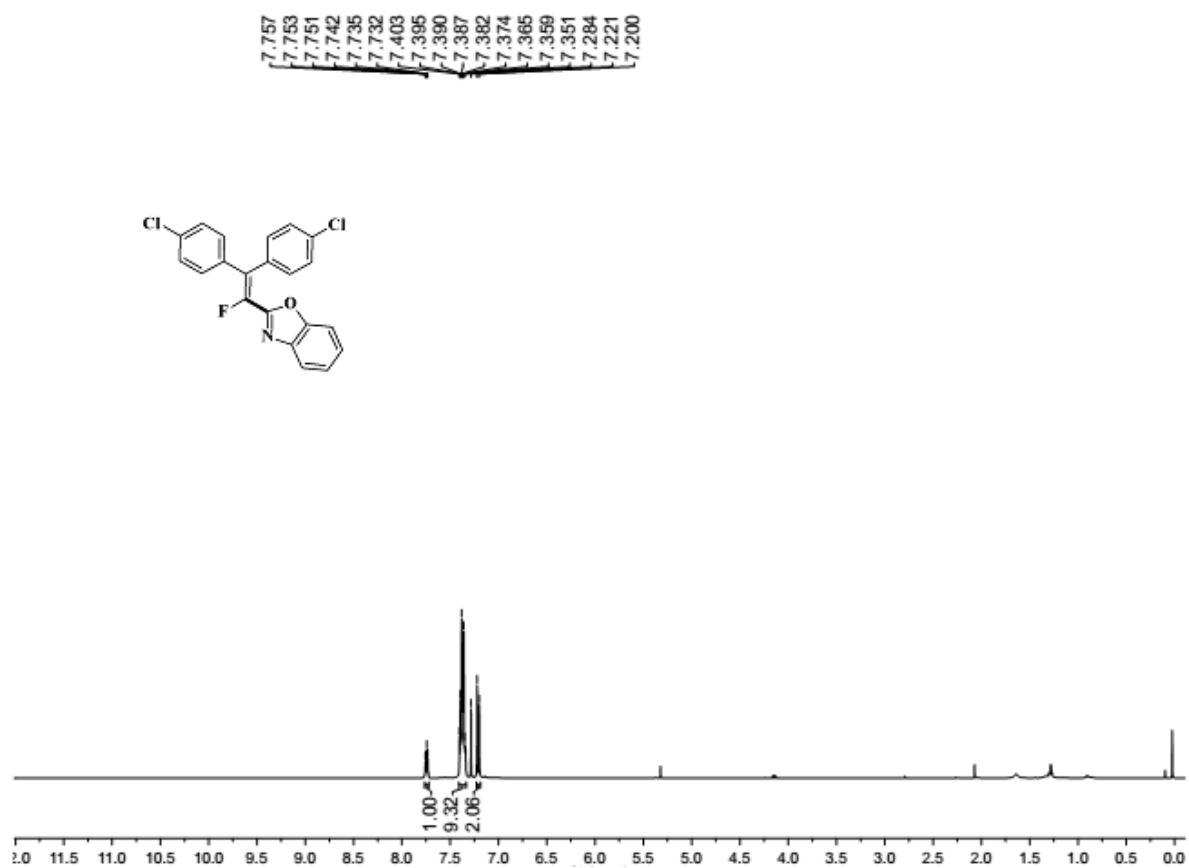

# <sup>19</sup>F NMR Spectrum of 3cc

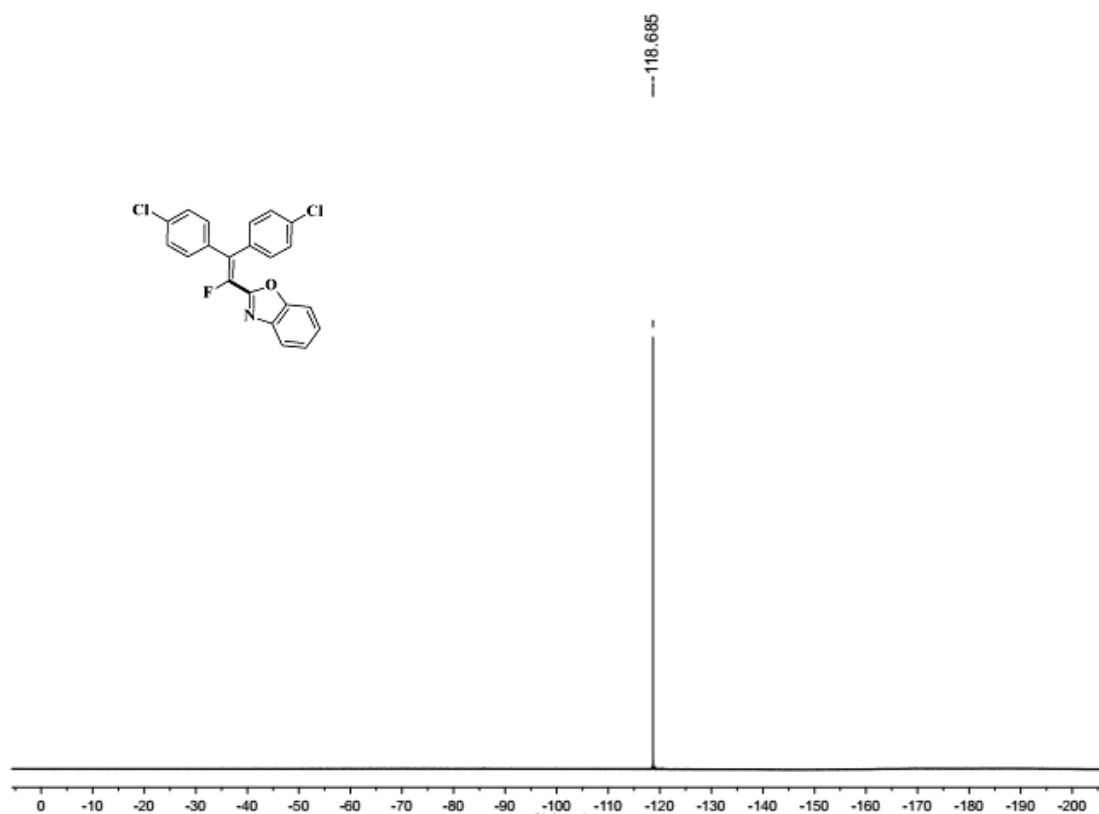

### <sup>13</sup>C NMR Spectrum of 3cc

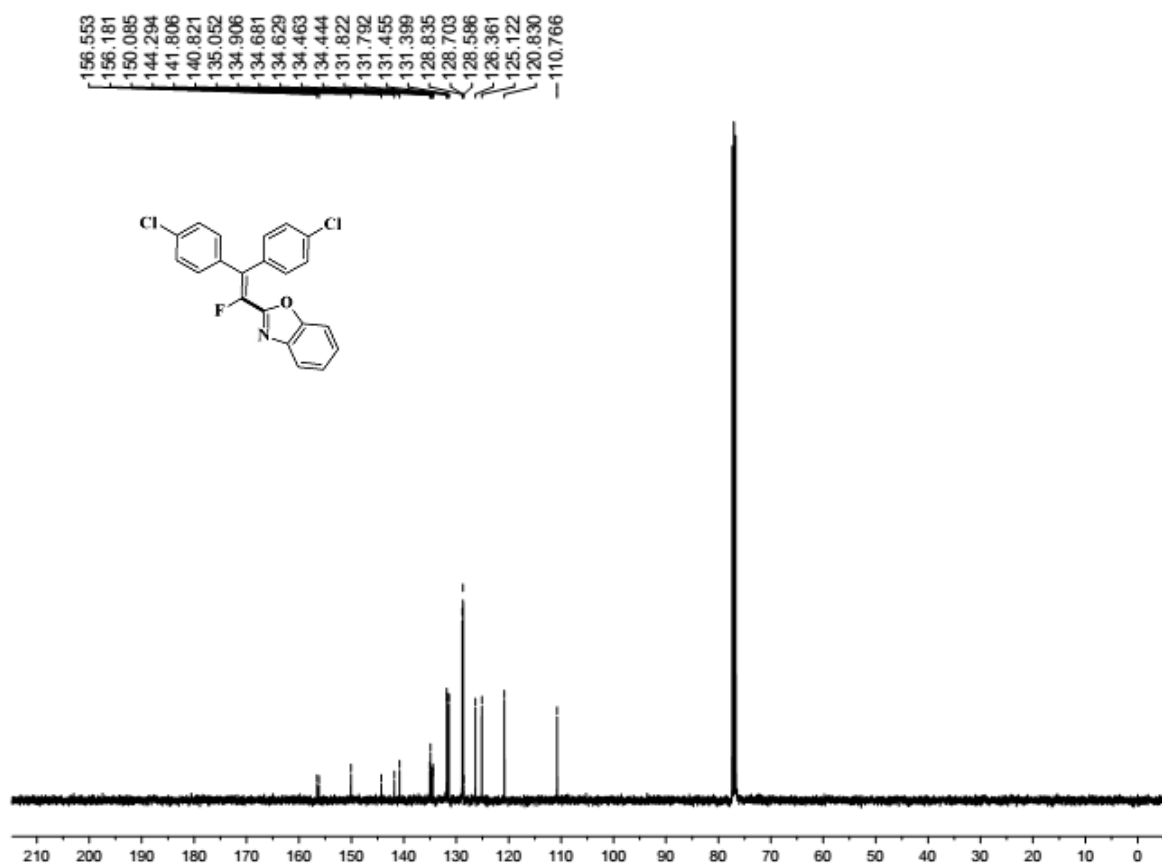

### HRMS (EI) of 3cc

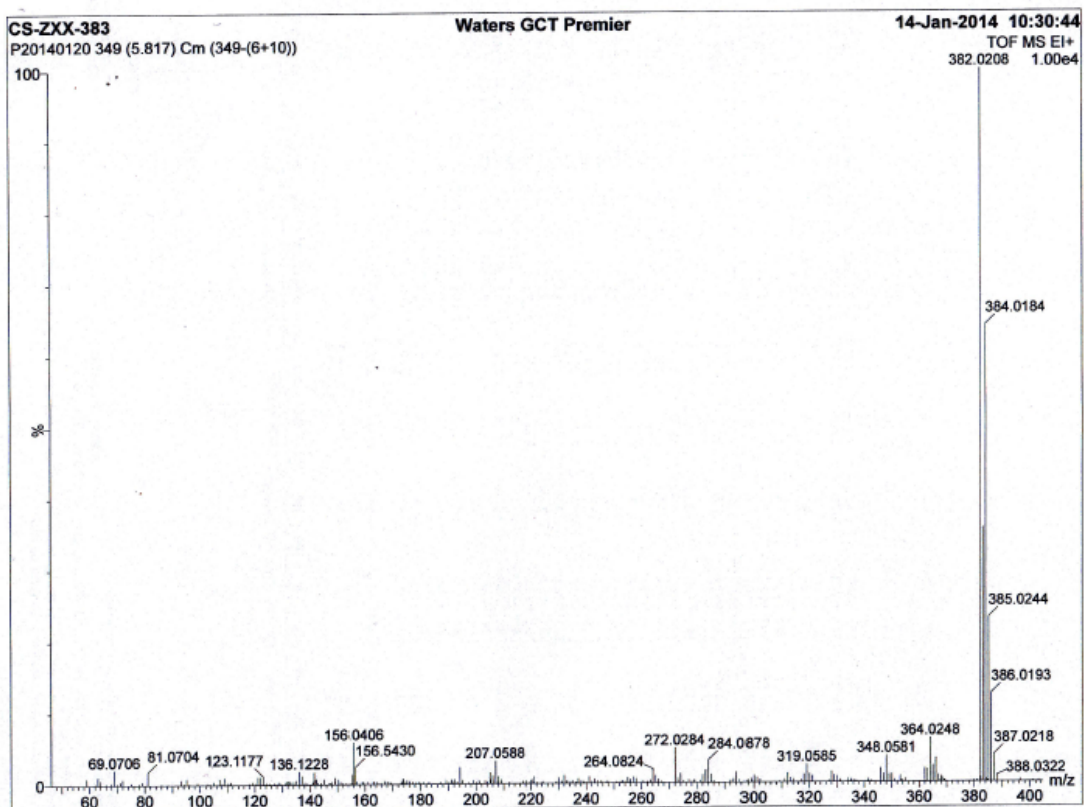

### <sup>1</sup>H NMR Spectrum of 3gc

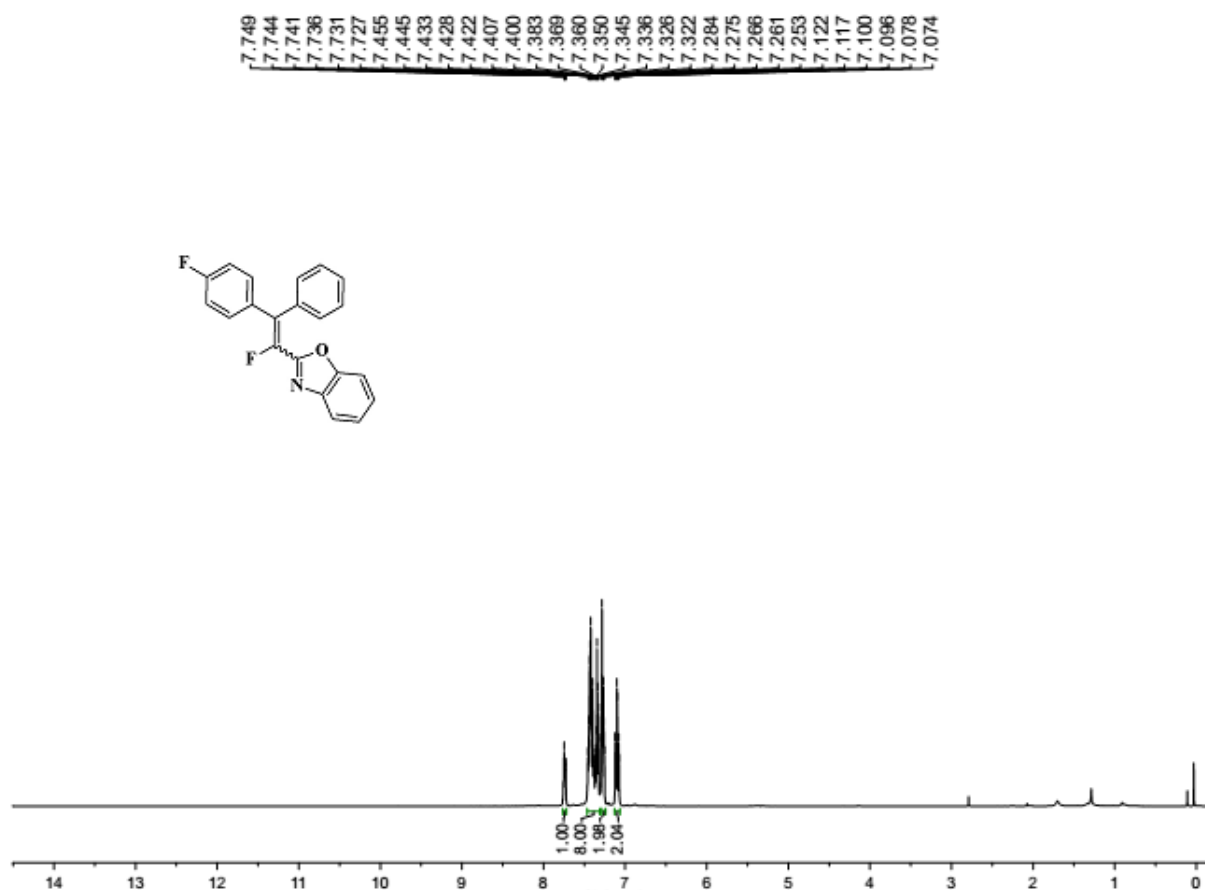

### <sup>19</sup>F NMR Spectrum of 3gc

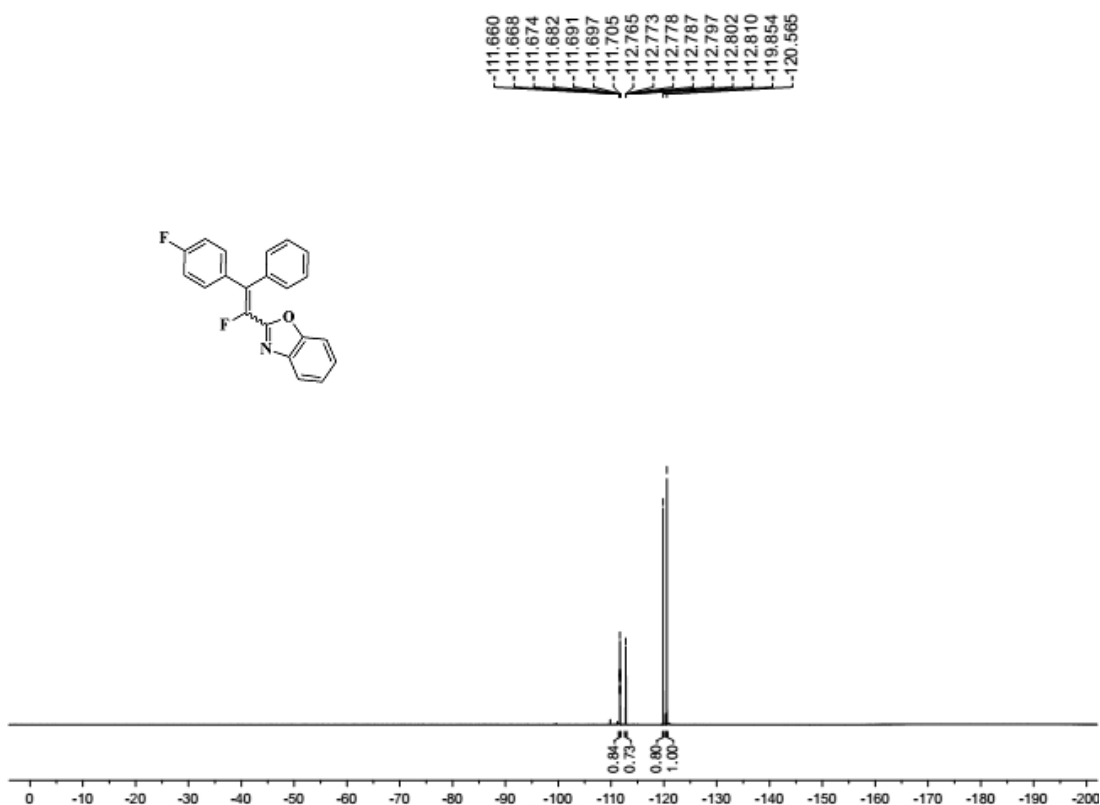

# <sup>13</sup>C NMR Spectrum of 3gc

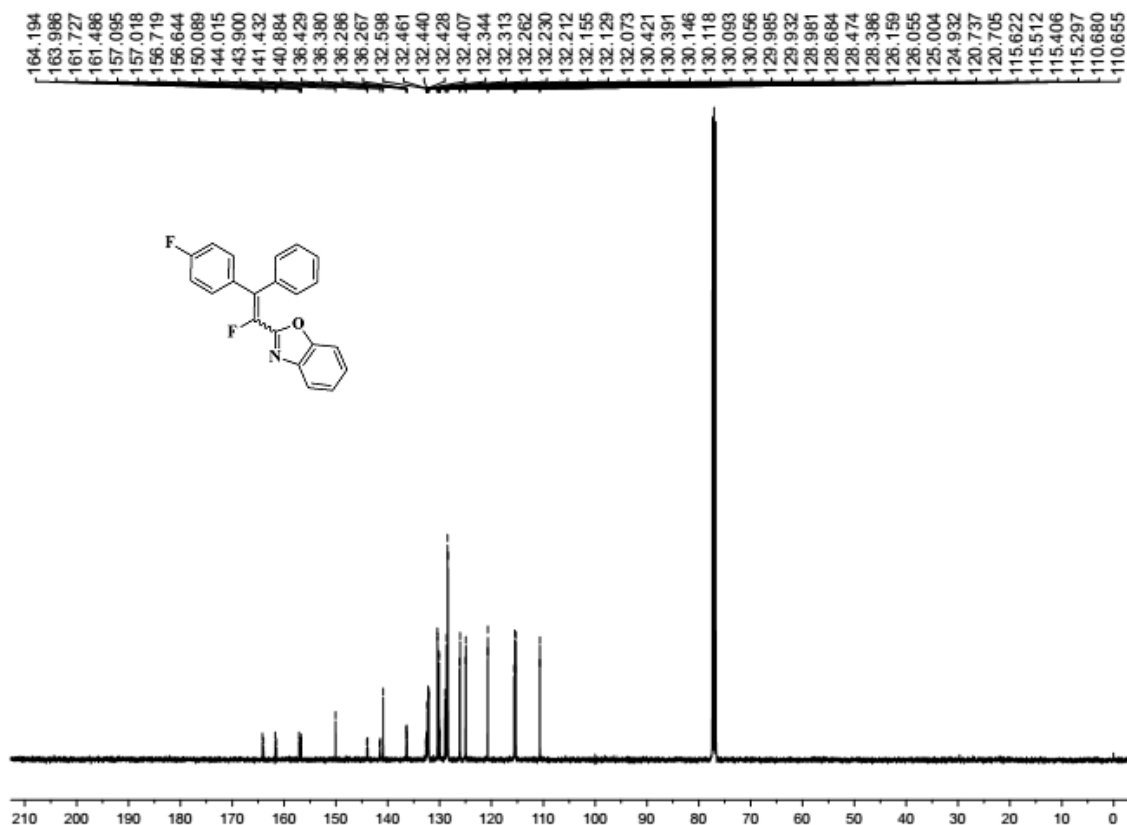

## HRMS (EI) of 3gc

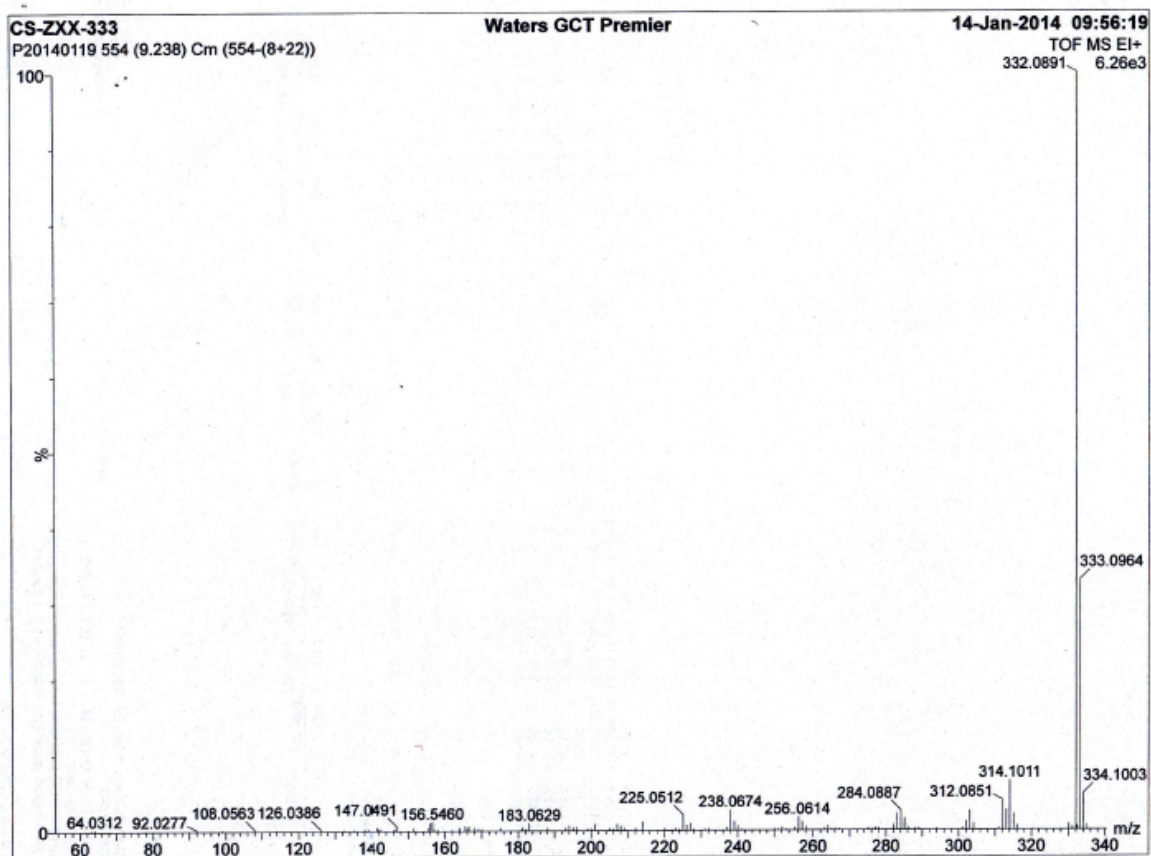

Supplement: c4ra13761b1.pdf [file c4ra13761b1.pdf]
